# Supplementary material for: The Mexican bean beetle (Epilachna varivestis) regurgitome and insights into beetle-borne virus specificity
Source: PLoS One. 2018 Jan 29;13(1):e0192003. doi: 10.1371/journal.pone.0192003 (PMC5788362; doi:10.1371/journal.pone.0192003)
Supplement: S2 Table — (XLSX) [file pone.0192003.s002.xlsx]

## Sheet: Sheet1
Table S3. Functional annotation of the 992 Epilachna varivestis contigs predicted to have a secretion signal.
Sequence name	Average Coverage	Manual Categorization	Sequence desc.	Notes	Top Orthololog	Sequence length	Hit desc.	Hit ACC	E-Value	Similarity	Bit-Score	Alignment length
contig_10027_45.04	45.04	Proteolysis	cathepsin b		Tribolium castaneum	1059	gi|282400164|ref|NP_001164205.1|cathepsin B precursor [Tribolium castaneum] >gi|270004839|gb|EFA01287.1| cathepsin B precursor [Tribolium castaneum]	NP_001164205	3.51854e-127	72	380.948	329
contig_100277_7.98	7.98	Proteolysis	serine-type enodpeptidase		Copidosoma floridanum	416	gi|936583303|ref|XP_014205679.1|PREDICTED: chymotrypsin-2-like [Copidosoma floridanum]	XP_014205679	4.00093e-08	60	60.077	56
contig_100772_5.30	5.3	Na/K-ATPase	v-type proton atpase 21 kda proteolipid subunit		Ceratosolen solmsi marchali	418	gi|766930766|ref|XP_011497534.1|PREDICTED: V-type proton ATPase 21 kDa proteolipid subunit-like [Ceratosolen solmsi marchali]	XP_011497534	2.52897e-68	87	217.624	139
contig_101162_11.00	11	Proteolysis	leishmanolysin-like peptidase		Tribolium castaneum	491	gi|189233723|ref|XP_970246.2|PREDICTED: leishmanolysin-like peptidase isoform X1 [Tribolium castaneum] >gi|1004403544|gb|EFA11490.2| Leishmanolysin-like peptidase [Tribolium castaneum]	XP_970246	5.42343e-37	78	144.821	111
contig_101335_13.19	13.19	RNA Processing	probable atp-dependent rna helicase dhx34		Tribolium castaneum	800	gi|189238427|ref|XP_973569.2|PREDICTED: probable ATP-dependent RNA helicase DHX34 [Tribolium castaneum] >gi|270008523|gb|EFA04971.1| putative ATP-dependent RNA helicase DHX34-like Protein [Tribolium castaneum]	XP_973569	2.76815e-102	83	333.569	258
contig_10151_29.49	29.49	Exocuticle-related	endocuticle structural glycoprotein bd-2-like		Acyrthosiphon pisum	720	gi|274324157|ref|NP_001162107.1|cuticle protein-like precursor [Acyrthosiphon pisum] >gi|239790598|dbj|BAH71851.1| ACYPI000444 [Acyrthosiphon pisum]	NP_001162107	1.51555e-69	93	221.861	125
contig_101652_8.39	8.39	Na/K-ATPase	sodium potassium calcium exchanger 4-like		Tribolium castaneum	992	gi|91083409|ref|XP_968752.1|PREDICTED: sodium/potassium/calcium exchanger 4 [Tribolium castaneum] >gi|270006894|gb|EFA03342.1| Sodium/potassium/calcium exchanger 5-like Protein [Tribolium castaneum]	XP_968752	6.45132e-136	77	408.683	313
contig_101822_12.12	12.12	Proteolysis	tpa_inf: cathepsin b		Aphis citricidus	400	gi|52630925|gb|AAU84926.1|putative cathepsin B-N [Aphis citricidus]	AAU84926	2.78625e-39	81	146.362	101
contig_10200_31.46	31.46	Defense/Immune Response	polyubiquitin		Naegleria gruberi	480	gi|290997001|ref|XP_002681070.1|polyubiquitin [Naegleria gruberi] >gi|284094693|gb|EFC48326.1| polyubiquitin [Naegleria gruberi]	XP_002681070	1.31961e-06	60	54.6842	71
contig_102668_6.46	6.46	UNKN	small integral membrane protein 14		Daphnia pulex	348	gi|321468955|gb|EFX79937.1|hypothetical protein DAPPUDRAFT_103759 [Daphnia pulex]	EFX79937	6.24534e-12	83	67.781	43
contig_104187_6.23	6.23	Signal Tranduction	interleukin-1 receptor-associated kinase 4-like		Acyrthosiphon pisum	453	gi|641656479|ref|XP_008179975.1|PREDICTED: interleukin-1 receptor-associated kinase 4-like [Acyrthosiphon pisum] >gi|641656481|ref|XP_008179976.1| PREDICTED: interleukin-1 receptor-associated kinase 4-like [Acyrthosiphon pisum] >gi|641656483|ref|XP_008179977.1| PREDICTED: interleukin-1 receptor-associated kinase 4-like [Acyrthosiphon pisum]	XP_008179975	1.08048e-41	89	155.606	99
contig_10436_17.51	17.51	Proteolysis	lysosomal aspartic protease-like		Tribolium castaneum	366	gi|91087085|ref|XP_974959.1|PREDICTED: aspartic proteinase A2 [Tribolium castaneum] >gi|1004398015|gb|KYB26436.1| Lysosomal aspartic protease-like Protein [Tribolium castaneum]	XP_974959	2.83877e-13	90	75.485	43
contig_10464_47.04	47.04	Structural	gelsolin isoform x1		Diuraphis noxia	1537	gi|985398198|ref|XP_015366663.1|PREDICTED: gelsolin-like [Diuraphis noxia]	XP_015366663	0	95	711.835	403
contig_104849_8.81	8.81	Detoxification	probable cytochrome p450 303a1		Halyomorpha halys	405	gi|939681879|ref|XP_014285899.1|PREDICTED: probable cytochrome P450 303a1 [Halyomorpha halys]	XP_014285899	1.59201e-13	58	77.0258	96
contig_10548_72.52	72.52	Transport	atp-binding cassette sub-family d member 3		Tribolium castaneum	2325	gi|1008451281|ref|XP_015838765.1|PREDICTED: ATP-binding cassette sub-family D member 3 [Tribolium castaneum] >gi|1004396381|gb|KYB25470.1| Multidrug resistance protein homolog 65 -like protein [Tribolium castaneum]	XP_015838765	0	89	1048.88	633
contig_10596_5.59	5.59	Fatty Acid & Lipid Metabolism	phospholipase a2-like isoform x1		Acyrthosiphon pisum	664	gi|326368257|ref|NP_001191907.1|phospholipase A2-like precursor [Acyrthosiphon pisum] >gi|641661632|ref|XP_008181953.1| PREDICTED: phospholipase A2-like isoform X1 [Acyrthosiphon pisum] >gi|641661634|ref|XP_008181954.1| PREDICTED: phospholipase A2-like isoform X1 [Acyrthosiphon pisum] >gi|641661636|ref|XP_008181955.1| PREDICTED: phospholipase A2-like isoform X1 [Acyrthosiphon pisum] >gi|641661638…	NP_001191907	1.08975e-50	89	177.178	102
contig_10615_31.85	31.85	Fatty Acid & Lipid Metabolism	lipase member h-a-like		Tribolium castaneum	1801	gi|1008451528|ref|XP_015838834.1|PREDICTED: lipase member H-A [Tribolium castaneum] >gi|1004396421|gb|KYB25494.1| Phospholipase A1 member A-like Protein [Tribolium castaneum]	XP_015838834	8.01086e-172	78	507.294	383
contig_107333_6.68	6.68	Protein & Amino Acid Metabolism	glycine cleavage system protein h		Variovorax paradoxus	461	gi|951108182|ref|WP_057597616.1|glycine cleavage system protein H [Variovorax paradoxus] >gi|939483271|gb|KPU88483.1| glycine cleavage system protein H [Variovorax paradoxus] >gi|939484458|gb|KPU89575.1| glycine cleavage system protein H [Variovorax paradoxus] >gi|939484825|gb|KPU89920.1| glycine cleavage system protein H [Variovorax paradoxus] >gi|939504412|gb|KPV08933.1| glycine cleavage system…	WP_057597616	8.886e-49	79	165.236	122
contig_10762_128.22	128.22	Defense/Immune Response	macrophage colony-stimulating factor 1 receptor	This receptor mediates most, if not all, of the biological effects of this cytokine (Examples of cytokines include the agents interleukin and the interferon which are involved in regulating the immune system's response to inflammation and infection)	Tribolium castaneum	772	gi|1004400557|gb|KYB27872.1|Vascular endothelial growth factor receptor 1-like Protein [Tribolium castaneum]	KYB27872	6.51901e-20	50	100.523	218
contig_108696_5.07	5.07	Transport	band 3 anion transport protein isoform x4		Acyrthosiphon pisum	436	gi|328713747|ref|XP_001951919.2|PREDICTED: anion exchange protein 3-like isoform X2 [Acyrthosiphon pisum]	XP_001951919	6.76935e-69	95	236.884	125
contig_109031_15.63	15.63	Translation	60s ribosomal protein partial		Strongylocentrotus purpuratus	300	gi|780115078|ref|XP_011677089.1|PREDICTED: 60S ribosomal protein L27 [Strongylocentrotus purpuratus]	XP_011677089	1.51884e-27	84	108.997	77
contig_109087_8.02	8.02	Na/K-ATPase	sodium potassium calcium exchanger 4		Danaus plexippus	448	gi|357627304|gb|EHJ77040.1|potassium-dependent sodium-calcium exchanger [Danaus plexippus]	EHJ77040	2.2369e-65	88	219.935	134
contig_110489_10.37	10.37	Exocuticle-related	membrane-bound lytic murein transglycosylase d precursor	Chitinase	Cystobacter violaceus Cb vi76	414	gi|667796836|gb|KFA86704.1|hypothetical protein Q664_52795 [Cystobacter violaceus Cb vi76]	KFA86704	2.41196e-40	78	144.821	111
contig_1107_203.84	203.84	Proteolysis	matrix metalloproteinase-14 isoform x2		Halyomorpha halys	499	gi|939680698|ref|XP_014285519.1|PREDICTED: matrix metalloproteinase-14-like [Halyomorpha halys]	XP_014285519	9.12408e-17	64	82.4185	102
contig_110716_17.63	17.63	Structural	laminin subunit alpha		Tribolium castaneum	303	gi|642916133|ref|XP_008190900.1|PREDICTED: laminin subunit alpha [Tribolium castaneum]	XP_008190900	1.77816e-35	83	140.584	91
contig_11102_63.81	63.81	Proteolysis	lysosomal thioesterase ppt2 homolog		Tribolium castaneum	1432	gi|91095125|ref|XP_971315.1|PREDICTED: lysosomal thioesterase PPT2 homolog [Tribolium castaneum]	XP_971315	2.9439e-140	87	417.157	267
contig_11113_81.44	81.44	Carbohydrate Metabolism	glycosyltransferase 25 family member		Tribolium castaneum	2139	gi|91078804|ref|XP_970300.1|PREDICTED: glycosyltransferase 25 family member [Tribolium castaneum] >gi|270003725|gb|EFA00173.1| Glycosyltransferase 25 family member-like Protein [Tribolium castaneum]	XP_970300	0	81	738.413	543
contig_111618_8.04	8.04	Transport	zinc transporter zip9		Acyrthosiphon pisum	512	gi|193659819|ref|XP_001948743.1|PREDICTED: zinc transporter ZIP9-B [Acyrthosiphon pisum]	XP_001948743	1.97917e-75	98	239.58	144
contig_11194_26.48	26.48	Sensory Respose	odorant binding protein 3		Aphis gossypii	569	gi|449332648|gb|AGE97633.1|odorant binding protein 3 [Aphis gossypii] >gi|520688593|gb|AGP04977.1| odorant-binding protein BP3 [Aphis gossypii]	AGE97633	1.6539e-96	100	288.886	141
contig_1124_64.06	64.06	Protein & Amino Acid Metabolism	tyrosine-protein phosphatase 99a isoform x1		Tribolium castaneum	3969	gi|1004403674|gb|KYB29709.1|Tyrosine-protein phosphatase 99A-like Protein [Tribolium castaneum]	KYB29709	0	90	1494.56	936
contig_113_5.763.52	5763.52	Defense/Immune Response	beta- -glucan-binding protein		Tribolium castaneum	1456	gi|91092316|ref|XP_970010.1|PREDICTED: beta-1,3-glucan-binding protein [Tribolium castaneum]	XP_970010	2.76041e-153	75	454.521	374
contig_113159_10.40	10.4	RNA Processing	cleavage and polyadenylation specificity factor subunit cg7185 isoform x3		Zootermopsis nevadensis	379	gi|646718923|gb|KDR21226.1|Cleavage and polyadenylation specificity factor subunit [Zootermopsis nevadensis]	KDR21226	1.79543e-09	91	65.4698	34
contig_113202_7.98	7.98	UNKN	type 11 methyltransferase		Rhizopus delemar RA 99-880	418	gi|384494475|gb|EIE84966.1|hypothetical protein RO3G_09676 [Rhizopus delemar RA 99-880]	EIE84966	8.75091e-43	79	153.68	101
contig_11349_72.62	72.62	Exocuticle-related	chitinase-like protein en03	Chitinase	Tribolium castaneum	1449	gi|113206042|ref|NP_001038092.1|imaginal disc growth factor 2 precursor [Tribolium castaneum] >gi|109895318|gb|ABG47451.1| imaginal disc growth factor 2 [Tribolium castaneum] >gi|270007357|gb|EFA03805.1| Chitinase-like protein Idgf4 [Tribolium castaneum]	NP_001038092	4.06e-176	76	514.998	417
contig_1140_37.10	37.1	Transport	de-cadherin isoform x1		Tribolium castaneum	6966	gi|642910969|ref|XP_001814885.2|PREDICTED: DE-cadherin [Tribolium castaneum]	XP_001814885	0	69	1463.74	1444
contig_115027_8.41	8.41	OX-REDOX	nadh dehydrogenase subunit partial		Trachymyrmex septentrionalis	308	gi|1009418670|gb|KYN37331.1|NADH-ubiquinone oxidoreductase chain 1 [Trachymyrmex septentrionalis]	KYN37331	2.47519e-23	87	97.8265	58
contig_1159_18.01	18.01	Transport	facilitated trehalose transporter tret1-like isoform x2		Zootermopsis nevadensis	1721	gi|646712959|gb|KDR17493.1|Sugar transporter ERD6-like 4 [Zootermopsis nevadensis]	KDR17493	2.55679e-122	69	383.259	388
contig_11689_227.46	227.46	Carbohydrate Metabolism	vesicular integral-membrane protein vip36	These results indicate that VIP36 functions as an intracellular lectin recognizing glycoproteins which possess high-mannose type glycans	Tribolium castaneum	1553	gi|91090624|ref|XP_973445.1|PREDICTED: vesicular integral-membrane protein VIP36 [Tribolium castaneum] >gi|270013907|gb|EFA10355.1| Vesicular integral-membrane protein VIP36-like Protein [Tribolium castaneum]	XP_973445	5.08715e-175	88	508.834	319
contig_117477_6.25	6.25	Structural	laminin subunit beta-1-like		Acyrthosiphon pisum	437	gi|641673056|ref|XP_008186171.1|PREDICTED: LOW QUALITY PROTEIN: laminin subunit beta-1 [Acyrthosiphon pisum]	XP_008186171	1.33921e-72	92	170.244	85
contig_11763_62.40	62.4	RNA Processing	sid1 transmembrane family member 1-like		Tribolium castaneum	2830	gi|1004399004|gb|EFA05674.2|SID1 transmembrane family member 1-like Protein [Tribolium castaneum]	EFA05674	0	80	997.268	757
contig_119045_5.29	5.29	Proteolysis	phosphate-regulating neutral partial		Rhizopus delemar RA 99-880	419	gi|384490863|gb|EIE82059.1|hypothetical protein RO3G_06764 [Rhizopus delemar RA 99-880]	EIE82059	1.04988e-79	99	258.455	139
contig_11935_79.07	79.07	DNA Replication & Repair	coiled-coil domain-containing protein 47		Tribolium castaneum	2212	gi|91088443|ref|XP_968621.1|PREDICTED: coiled-coil domain-containing protein 47 [Tribolium castaneum] >gi|1008449047|ref|XP_015838178.1| PREDICTED: coiled-coil domain-containing protein 47 [Tribolium castaneum] >gi|270011745|gb|EFA08193.1| Coiled-coil domain-containing protein 47-like Protein [Tribolium castaneum]	XP_968621	0	89	578.17	387
contig_119489_10.87	10.87	Na/K-ATPase	cation efflux pump		Batrachochytrium dendrobatidis JAM81	315	gi|575471498|ref|XP_006675042.1|hypothetical protein BATDEDRAFT_8761 [Batrachochytrium dendrobatidis JAM81] >gi|328774237|gb|EGF84274.1| hypothetical protein BATDEDRAFT_8761 [Batrachochytrium dendrobatidis JAM81]	XP_006675042	1.34388e-27	77	114.005	104
contig_119620_5.62	5.62	UNKN	disco-interacting protein 2 isoform x2		Diaphorina citri	313	gi|662200580|ref|XP_008473506.1|PREDICTED: disco-interacting protein 2 homolog A-like [Diaphorina citri]	XP_008473506	8.32069e-50	96	165.622	99
contig_120303_5.95	5.95	Carbohydrate Metabolism	alpha-n-acetylgalactosaminidase-like		Acyrthosiphon pisum	694	gi|328704370|ref|XP_001944081.2|PREDICTED: alpha-N-acetylgalactosaminidase-like [Acyrthosiphon pisum] >gi|641656675|ref|XP_008180056.1| PREDICTED: alpha-N-acetylgalactosaminidase-like [Acyrthosiphon pisum]	XP_001944081	2.48225e-135	97	400.208	198
contig_12031_252.38	252.38	Proteolysis	lysosomal aspartic protease		Tribolium castaneum	522	gi|91093044|ref|XP_966517.1|PREDICTED: lysosomal aspartic protease [Tribolium castaneum] >gi|270002651|gb|EEZ99098.1| Lysosomal aspartic protease-like Protein [Tribolium castaneum]	XP_966517	4.44113e-38	89	145.591	86
contig_120419_7.58	7.58	Metabolism	s-adenosylmethionine synthase		Botrytis cinerea B05.10	512	gi|154315126|ref|XP_001556886.1|S-adenosylmethionine synthetase [Botrytis cinerea B05.10] >gi|347837737|emb|CCD52309.1| similar to S-adenosylmethionine synthetase [Botrytis cinerea T4] >gi|472236840|gb|EMR81762.1| putative s-adenosylmethionine synthetase protein [Botrytis cinerea BcDW1]	XP_001556886	4.76484e-31	100	126.716	60
contig_120492_5.03	5.03	Proteolysis	aspartyl proteinase		Rhizopus delemar RA 99-880	343	gi|384484398|gb|EIE76578.1|hypothetical protein RO3G_01282 [Rhizopus delemar RA 99-880]	EIE76578	5.03282e-39	100	145.206	63
contig_12054_147.37	147.37	Cell Cycle & Processes	integrin beta-ps		Dendroctonus ponderosae	3811	gi|546683392|gb|ERL93211.1|hypothetical protein D910_10507, partial [Dendroctonus ponderosae]	ERL93211	0	77	950.658	787
contig_122755_5.53	5.53	Fatty Acid & Lipid Metabolism	lipase 3		Zootermopsis nevadensis	398	gi|646711129|gb|KDR16428.1|Lipase 3 [Zootermopsis nevadensis]	KDR16428	7.97841e-11	69	68.9366	65
contig_123_323.42	323.42	Na/K-ATPase	sodium hydrogen exchanger 8		Oryctes borbonicus	3801	gi|952521834|gb|KRT81874.1|Na/H antiporter [Oryctes borbonicus]	KRT81874	0	87	959.903	661
contig_12340_141.46	141.46	Proteolysis	digestive cysteine proteinase 1	A putative digestive cysteine proteinase from Drosophila melanogaster is predominantly expressed in the embryonic and larval midgut.	Tribolium castaneum	1973	gi|282158089|ref|NP_001164088.1|cathepsin L precursor [Tribolium castaneum]	NP_001164088	0	81	811.216	554
contig_123862_7.39	7.39	Structural	actin		Marssonina brunnea f. sp. 'multigermtubi'	660	gi|283484367|gb|ADB23413.1|actin [Marssonina brunnea f. sp. 'multigermtubi']	ADB23413	2.62538e-44	98	129.413	63
contig_124409_15.79	15.79	UNKN	uncharacterised protein		Macaca mulatta	306	gi|355560594|gb|EHH17280.1|hypothetical protein EGK_13646, partial [Macaca mulatta]	EHH17280	1.20403e-32	84	122.865	73
contig_12450_140.64	140.64	Proteolysis	chymotrypsin-c isoform x1	Chymotrypsin C is a member of the peptidase S1 family. The encoded protein is a serum calcium-decreasing factor that has chymotrypsin-like protease activity	Tribolium castaneum	2928	gi|189239809|ref|XP_970870.2|PREDICTED: transmembrane protease serine 2 isoform X2 [Tribolium castaneum] >gi|1004397424|gb|KYB26080.1| serine protease P68 [Tribolium castaneum]	XP_970870	1.36469e-131	78	421.779	299
contig_12512_92.53	92.53	Defense/Immune Response	myrosinase 1	Myrosinase is a family of enzymes involved in plant defense against herbivore	Tribolium castaneum	824	gi|91087403|ref|XP_975666.1|PREDICTED: myrosinase 1 [Tribolium castaneum]	XP_975666	1.706e-77	76	255.758	213
contig_126186_5.87	5.87	DNA Replication & Repair	dna replication atp-dependent helicase nuclease dna2 isoform x1		Dendroctonus ponderosae	356	gi|478254509|gb|ENN74756.1|hypothetical protein YQE_08664, partial [Dendroctonus ponderosae]	ENN74756	2.07624e-44	80	166.392	118
contig_126573_5.47	5.47	Proteolysis	pectinesterase 1-like	is a ubiquitous cell-wall-associated enzyme that presents several isoforms that facilitate plant cell wall modification and subsequent breakdown	Fraxinus excelsior	472	gi|589912875|gb|AHL24653.1|Fra e 11.01 allergen [Fraxinus excelsior]	AHL24653	1.50271e-88	91	275.404	157
contig_126892_8.14	8.14	OX-REDOX	peroxiredoxin 4 precursor		Aplysia californica	329	gi|524891178|ref|XP_005102125.1|PREDICTED: peroxiredoxin-1-like [Aplysia californica]	XP_005102125	1.77405e-25	85	107.071	68
contig_12913_25.59	25.59	Proteolysis	cd109 antigen		Tribolium castaneum	1421	gi|91085649|ref|XP_970922.1|PREDICTED: CD109 antigen [Tribolium castaneum] >gi|270011037|gb|EFA07485.1| CD109 antigen-like Protein [Tribolium castaneum]	XP_970922	1.72916e-131	72	429.869	363
contig_1296_903.36	903.36	Proteolysis	serine protease easter-like		Tribolium castaneum	1020	gi|270011110|gb|EFA07558.1|serine protease P136 [Tribolium castaneum]	EFA07558	4.70079e-20	56	99.3673	125
contig_129614_5.32	5.32	Metabolism	alpha-n-acetylgalactosaminidase-like		Zootermopsis nevadensis	417	gi|646723001|gb|KDR23773.1|Alpha-N-acetylgalactosaminidase [Zootermopsis nevadensis]	KDR23773	6.87181e-55	92	189.119	107
contig_12992_13.33	13.33	Fatty Acid & Lipid Metabolism	apolipoprotein d-like		Acyrthosiphon pisum	666	gi|641660819|ref|XP_008181632.1|PREDICTED: apolipoprotein D-like isoform X1 [Acyrthosiphon pisum]	XP_008181632	1.90574e-129	94	379.793	200
contig_13014_106.38	106.38	UNKN	transmembrane protein 165		Tribolium castaneum	1224	gi|91081711|ref|XP_971334.1|PREDICTED: transmembrane protein 165 [Tribolium castaneum] >gi|270006252|gb|EFA02700.1| Transmembrane protein 165-like Protein [Tribolium castaneum]	XP_971334	4.30348e-139	91	412.149	234
contig_13016_72.98	72.98	UNKN	transmembrane protein 161b		Tribolium castaneum	1433	gi|91093829|ref|XP_969227.1|PREDICTED: transmembrane protein 161B [Tribolium castaneum] >gi|1004395655|gb|KYB25035.1| Transmembrane protein 161B-like Protein [Tribolium castaneum]	XP_969227	0	88	573.548	362
contig_130535_5.81	5.81	Defense/Immune Response	tata-binding protein-associated factor 172		Diuraphis noxia	300	gi|985425675|ref|XP_015378317.1|PREDICTED: TATA-binding protein-associated factor 172-like, partial [Diuraphis noxia]	XP_015378317	1.24155e-64	99	206.838	100
contig_13072_77.04	77.04	Detoxification	venom carboxylesterase-6		Leptinotarsa decemlineata	1428	gi|728416727|gb|AIY68319.1|putative beta-esterase [Leptinotarsa decemlineata]	AIY68319	6.66623e-134	76	410.994	355
contig_131972_5.50	5.5	Signal Tranduction	bone morphogenetic protein receptor type-1b		Diuraphis noxia	402	gi|985421210|ref|XP_015376014.1|PREDICTED: bone morphogenetic protein receptor type-1B-like [Diuraphis noxia]	XP_015376014	3.76322e-53	96	186.808	90
contig_132455_5.57	5.57	Carbohydrate Metabolism	glycosyl hydrolase family 15		Sorangium cellulosum	403	gi|1005222518|gb|KYF89121.1|glucoamylase [Sorangium cellulosum]	KYF89121	1.056e-54	80	192.2	134
contig_135222_5.70	5.7	Heat Shock/Stess Response	heat shock 70 kda protein cognate 3		Bactrocera dorsalis	310	gi|751784443|ref|XP_011201513.1|PREDICTED: heat shock 70 kDa protein cognate 3 [Bactrocera dorsalis] >gi|751784445|ref|XP_011201514.1| PREDICTED: heat shock 70 kDa protein cognate 3 [Bactrocera dorsalis]	XP_011201513	2.44061e-21	89	98.5969	59
contig_135579_7.32	7.32	Nucleotide Metabolism	adenylate kinase isoenzyme 6		Daphnia pulex	301	gi|321462960|gb|EFX73979.1|hypothetical protein DAPPUDRAFT_307499 [Daphnia pulex]	EFX73979	2.54345e-12	84	69.707	45
contig_135686_5.45	5.45	Fatty Acid & Lipid Metabolism	plc-like phosphodiesterase		Erysiphe necator	316	gi|730182715|gb|KHJ34155.1|putative plc-like phosphodiesterase [Erysiphe necator]	KHJ34155	8.86422e-31	86	121.709	73
contig_136881_5.26	5.26	Heat Shock/Stess Response	peptidyl-prolyl cis-trans isomerase-like 4		Octopus bimaculoides	333	gi|918331801|gb|KOF95234.1|hypothetical protein OCBIM_22039116mg [Octopus bimaculoides]	KOF95234	2.65987e-09	83	62.7734	67
contig_137046_7.35	7.35	Transport	gtp-binding protein sara		Botrytis cinerea B05.10	351	gi|154291379|ref|XP_001546273.1|GTP-binding protein sarA [Botrytis cinerea B05.10] >gi|347839623|emb|CCD54195.1| similar to small COPII coat GTPase sar1 [Botrytis cinerea T4] >gi|472245212|gb|EMR89788.1| putative small monomeric gtpase protein [Botrytis cinerea BcDW1]	XP_001546273	3.11194e-61	100	197.978	96
contig_138145_6.95	6.95	Fatty Acid & Lipid Metabolism	pancreatic triacylglycerol lipase		Acyrthosiphon pisum	321	gi|193582584|ref|XP_001950950.1|PREDICTED: pancreatic lipase-related protein 2-like [Acyrthosiphon pisum]	XP_001950950	1.60141e-47	85	166.392	98
contig_1382_1.663.85	1663.85	Heat Shock/Stess Response	calreticulin		Tribolium castaneum	2100	gi|642933915|ref|XP_008197565.1|PREDICTED: calreticulin [Tribolium castaneum] >gi|270013651|gb|EFA10099.1| Calreticulin-like Protein [Tribolium castaneum]	XP_008197565	0	89	560.066	347
contig_138408_5.66	5.66	Transport	vesicle-trafficking protein sec22b-b		Zootermopsis nevadensis	305	gi|646713824|gb|KDR18017.1|Vesicle-trafficking protein SEC22b-B [Zootermopsis nevadensis]	KDR18017	1.1036e-21	94	95.9005	51
contig_138549_9.26	9.26	Heat Shock/Stess Response	cytochrome c oxidase copper chaperone		Diuraphis noxia	320	gi|985409544|ref|XP_015370172.1|PREDICTED: cytochrome c oxidase copper chaperone [Diuraphis noxia]	XP_015370172	4.58416e-26	94	103.605	55
contig_1392_580.69	580.69	Proteolysis	angiotensin-converting enzyme	ACE hydrolyzes peptides by the removal of a dipeptide from the C-terminus.	Tribolium castaneum	3553	gi|642925507|ref|XP_008194579.1|PREDICTED: angiotensin-converting enzyme [Tribolium castaneum] >gi|270008859|gb|EFA05307.1| Angiotensin-converting enzyme-like Protein [Tribolium castaneum]	XP_008194579	0	76	803.127	614
contig_13992_6.17	6.17	UNKN	hypothetical protein L969DRAFT_92722		Mixia osmundae IAM 14324	372	gi|953453079|ref|XP_014570092.1|hypothetical protein L969DRAFT_92722 [Mixia osmundae IAM 14324] >gi|358058627|dbj|GAA95590.1| hypothetical protein E5Q_02246 [Mixia osmundae IAM 14324] >gi|658166783|gb|KEI41493.1| hypothetical protein L969DRAFT_92722 [Mixia osmundae IAM 14324]	XP_014570092	2.65612e-09	57	65.0846	127
contig_14_359.01	359.01	Carbohydrate Metabolism	dolichyl-diphosphooligosaccharide--protein glycosyltransferase subunit 1		Tribolium castaneum	1506	gi|91095077|ref|XP_972905.1|PREDICTED: dolichyl-diphosphooligosaccharide--protein glycosyltransferase subunit 1 [Tribolium castaneum] >gi|270014775|gb|EFA11223.1| Dolichyl-diphosphooligosaccharide--protein glycosyltransferase subunit 1-like Protein [Tribolium castaneum]	XP_972905	0	83	601.282	458
contig_14050_82.29	82.29	Proteolysis	adam 17-like protease isoform x1		Tribolium castaneum	1463	gi|642913783|ref|XP_008201159.1|PREDICTED: ADAM 17-like protease isoform X1 [Tribolium castaneum] >gi|1004402853|gb|EEZ98535.2| ADAM 17-like protease [Tribolium castaneum]	XP_008201159	0	76	565.074	448
contig_1433_878.29	878.29	Fatty Acid & Lipid Metabolism	pancreatic lipase-related protein 2-like		Tribolium castaneum	1241	gi|91075982|ref|XP_969958.1|PREDICTED: inactive pancreatic lipase-related protein 1 [Tribolium castaneum] >gi|270014614|gb|EFA11062.1| Vitellogenin-3-like Protein [Tribolium castaneum]	XP_969958	8.21988e-63	63	216.468	245
contig_14376_5.79	5.79	Exocuticle-related	probable chitinase 3	Chitinase	Cimex lectularius	487	gi|939245209|ref|XP_014241974.1|PREDICTED: probable chitinase 3 [Cimex lectularius]	XP_014241974	2.59287e-10	50	69.3218	97
contig_145378_6.00	6	UNKN	transmembrane channel-like protein 3		Dendroctonus ponderosae	381	gi|478263474|gb|ENN81829.1|hypothetical protein YQE_01768, partial [Dendroctonus ponderosae]	ENN81829	1.73379e-25	84	112.079	110
contig_14580_11.31	11.31	Defense/Immune Response	c-type lectin-like precursor		Diuraphis noxia	878	gi|985408889|ref|XP_015369817.1|PREDICTED: uncharacterized protein LOC107165894 [Diuraphis noxia]	XP_015369817	2.45769e-159	100	455.677	217
contig_146695_5.54	5.54	Transport	probable manganese-transporting atpase pdr2		Dictyostelium purpureum	300	gi|330793267|ref|XP_003284706.1|hypothetical protein DICPUDRAFT_53138 [Dictyostelium purpureum] >gi|325085306|gb|EGC38715.1| hypothetical protein DICPUDRAFT_53138 [Dictyostelium purpureum]	XP_003284706	1.57743e-23	77	105.531	84
contig_1484_778.27	778.27	Heat Shock/Stess Response	heat shock 70 kda protein cognate 3		Tribolium castaneum	2380	gi|1008427630|ref|XP_008200986.2|PREDICTED: heat shock 70 kDa protein cognate 3 [Tribolium castaneum] >gi|1008427632|ref|XP_015838368.1| PREDICTED: heat shock 70 kDa protein cognate 3 [Tribolium castaneum] >gi|1004403302|gb|EEZ98819.2| Heat shock 70 kDa protein cognate 3-like Protein [Tribolium castaneum]	XP_008200986	0	97	1145.57	637
contig_149370_5.07	5.07	Sensory Response	hypoxia up-regulated protein 1		Dendroctonus ponderosae	429	gi|546684942|gb|ERL94524.1|hypothetical protein D910_11801 [Dendroctonus ponderosae]	ERL94524	1.01214e-38	85	150.214	96
contig_15330_51.59	51.59	Carbohydrate Metabolism	probable dol-p-man:man c -pp-dol alpha- -mannosyltransferase isoform x1		Tribolium castaneum	3163	gi|91094203|ref|XP_971608.1|PREDICTED: dol-P-Man:Man(7)GlcNAc(2)-PP-Dol alpha-1,6-mannosyltransferase [Tribolium castaneum]	XP_971608	0	88	758.059	478
contig_1546_54.48	54.48	Signal Tranduction	frizzled-7		Dendroctonus ponderosae	4183	gi|478258331|gb|ENN78450.1|hypothetical protein YQE_05088, partial [Dendroctonus ponderosae]	ENN78450	0	81	775.778	549
contig_1551_10.18	10.18	Carbohydrate Metabolism	udp-glucose 4-epimerase-like		Microplitis demolitor	541	gi|665795229|ref|XP_008545350.1|PREDICTED: UDP-glucose 4-epimerase [Microplitis demolitor] >gi|665795231|ref|XP_008545351.1| PREDICTED: UDP-glucose 4-epimerase [Microplitis demolitor]	XP_008545350	1.31335e-22	69	102.834	88
contig_15663_137.37	137.37	Proteolysis	isoform e	Nicastrin (abbreviated NCT) is a protein that is part of the gamma secretase protein complex, which is one of the proteases involved in processing amyloid precursor protein (APP) to the short Alzheimer's disease-associated peptide amyloid beta	Tribolium castaneum	4360	gi|642925855|ref|XP_008190573.1|PREDICTED: nicastrin [Tribolium castaneum] >gi|1004399105|gb|EFA05049.2| Nicastrin-like Protein [Tribolium castaneum]	XP_008190573	0	69	679.093	686
contig_157_991.54	991.54	Proteolysis	cathepsin l		Tribolium castaneum	1922	gi|902940839|ref|NP_001298082.1|cathepsin L precursor [Tribolium castaneum] >gi|270001249|gb|EEZ97696.1| cathepsin L precursor [Tribolium castaneum]	NP_001298082	0	86	544.273	335
contig_15889_17.55	17.55	UNKN	transmembrane emp24 domain-containing protein eca		Diuraphis noxia	800	gi|985392012|ref|XP_015363281.1|PREDICTED: transmembrane emp24 domain-containing protein eca [Diuraphis noxia]	XP_015363281	7.74501e-132	100	384.8	199
contig_1619_1.491.44	1491.44	Proteolysis	mast cell protease 6		Tenebrio molitor	781	gi|10697178|emb|CAC12696.1|prophenoloxidase activating factor [Tenebrio molitor]	CAC12696	2.14554e-48	83	176.407	106
contig_1623_1.516.39	1516.39	Proteolysis	prosaposin	They probably act by isolating the lipid substrate from the membrane surroundings, thus making it more accessible to the soluble degradative enzymes	Tribolium castaneum	3217	gi|91077504|ref|XP_966852.1|PREDICTED: prosaposin [Tribolium castaneum] >gi|270001598|gb|EEZ98045.1| Prosaposin-like Protein [Tribolium castaneum]	XP_966852	0	69	851.277	832
contig_16285_43.46	43.46	Heat Shock/Stess Response	calreticulin		Diuraphis noxia	1942	gi|985389747|ref|XP_015379492.1|PREDICTED: calreticulin [Diuraphis noxia]	XP_015379492	0	98	709.909	408
contig_1630_613.53	613.53	Proteolysis	lysosomal aspartic protease		Tribolium castaneum	1381	gi|91093044|ref|XP_966517.1|PREDICTED: lysosomal aspartic protease [Tribolium castaneum] >gi|270002651|gb|EEZ99098.1| Lysosomal aspartic protease-like Protein [Tribolium castaneum]	XP_966517	0	87	587.03	366
contig_165_151.31	151.31	UNKN	agap007259-pa-like protein		Tribolium castaneum	648	gi|1008434793|ref|XP_015834250.1|PREDICTED: uncharacterized protein CG1161 [Tribolium castaneum] >gi|1004401209|gb|EEZ99657.2| Uncharacterized protein CG1161-like Protein [Tribolium castaneum]	XP_015834250	5.56289e-37	80	139.428	138
contig_1650_108.97	108.97	Proteolysis	membrane-bound transcription factor site-1 protease		Tribolium castaneum	3202	gi|1004402030|gb|EFA00011.2|Membrane-bound transcription factor site-1 protease-like Protein [Tribolium castaneum]	EFA00011	0	89	1548.1	928
contig_16518_8.27	8.27	Defense/Immune Response	digestive cysteine proteinase 1		Zootermopsis nevadensis	1117	gi|646702402|gb|KDR11614.1|Counting factor associated protein D [Zootermopsis nevadensis]	KDR11614	5.72117e-110	68	345.51	308
contig_1654_1.352.18	1352.18	Proteolysis	serine protease easter		Oryctes borbonicus	678	gi|952513911|gb|KRT80414.1|Trypsin, partial [Oryctes borbonicus]	KRT80414	6.78195e-18	52	90.5077	136
contig_16558_58.91	58.91	Carbohydrate Metabolism	udp-glucose:glycoprotein glucosyltransferase		Tribolium castaneum	479	gi|642923178|ref|XP_008193642.1|PREDICTED: UDP-glucose:glycoprotein glucosyltransferase isoform X2 [Tribolium castaneum]	XP_008193642	3.55786e-13	67	77.7962	92
contig_16602_88.59	88.59	OD-REDOX	3-ketodihydrosphingosine reductase		Dendroctonus ponderosae	1499	gi|478257403|gb|ENN77559.1|hypothetical protein YQE_05855, partial [Dendroctonus ponderosae]	ENN77559	4.17532e-124	75	378.637	316
contig_16659_40.24	40.24	Heat Shock/Stess Response	protein disulfide-isomerase		Zootermopsis nevadensis	2668	gi|646718913|gb|KDR21216.1|Protein disulfide-isomerase [Zootermopsis nevadensis]	KDR21216	0	84	623.239	457
contig_1676_117.05	117.05	Development	protein catecholamines up	Catsup gene product is essential throughout development	Tribolium castaneum	1500	gi|91082985|ref|XP_974198.1|PREDICTED: protein catecholamines up [Tribolium castaneum] >gi|270007032|gb|EFA03480.1| Protein catecholamines up-like Protein [Tribolium castaneum]	XP_974198	3.25725e-101	76	320.087	345
contig_16885_97.31	97.31	Carbohydrate Metabolism	glucosyl glucuronosyl transferase		Tribolium castaneum	1320	gi|1008451562|ref|XP_015838844.1|PREDICTED: 2-hydroxyacylsphingosine 1-beta-galactosyltransferase isoform X2 [Tribolium castaneum]	XP_015838844	1.5291e-85	66	280.411	344
contig_17067_20.64	20.64	Cell Cycle & Processes	protein cueball	Has a role in spermatogenesis and oogenesis	Tribolium castaneum	1094	gi|642916400|ref|XP_008191007.1|PREDICTED: protein cueball [Tribolium castaneum] >gi|1004401937|gb|EFA00096.2| Protein cueball-like Protein [Tribolium castaneum]	XP_008191007	8.21901e-107	74	337.806	295
contig_17177_19.49	19.49	Exocuticle-related	chitinase 3-like protein	Chitinase	Tribolium castaneum	367	gi|86515376|ref|NP_001034517.1|chitinase 5 precursor [Tribolium castaneum] >gi|58220088|gb|AAW67572.1| chitinase 6 [Tribolium castaneum] >gi|270009862|gb|EFA06310.1| putative chitinase 3-like Protein [Tribolium castaneum]	NP_001034517	9.25991e-24	73	103.99	79
contig_1733_103.51	103.51	UNKN	transmembrane emp24 domain-containing protein 6		Tribolium castaneum	3047	gi|91090696|ref|XP_974756.1|PREDICTED: transmembrane emp24 domain-containing protein A [Tribolium castaneum] >gi|270013945|gb|EFA10393.1| Transmembrane emp24 domain-containing protein 5-like Protein [Tribolium castaneum]	XP_974756	1.29026e-114	87	365.54	224
contig_17353_16.16	16.16	Structural	tubulin gamma-2 chain		Tribolium castaneum	1745	gi|189238634|ref|XP_001811204.1|PREDICTED: tubulin gamma-1 chain isoform X2 [Tribolium castaneum] >gi|1004398895|gb|KYB26929.1| Tubulin gamma-1 chain-like Protein [Tribolium castaneum]	XP_001811204	0	93	770.77	441
contig_17449_22.26	22.26	Exocuticle-related	probable chitinase 2	Chitinase	Tribolium castaneum	1519	gi|189239365|ref|XP_970191.2|PREDICTED: probable chitinase 2 [Tribolium castaneum] >gi|270010475|gb|EFA06923.1| putative chitinase 2-like Protein [Tribolium castaneum]	XP_970191	0	80	577.015	398
contig_17497_187.11	187.11	Signal Tranduction	ldlr chaperone boca		Tribolium castaneum	821	gi|91077606|ref|XP_973520.1|PREDICTED: LDLR chaperone boca [Tribolium castaneum] >gi|270001559|gb|EEZ98006.1| LDLR chaperone boca-like Protein [Tribolium castaneum]	XP_973520	2.57031e-61	89	204.142	165
contig_17507_118.58	118.58	Proteolysis	alpha-2-macroglobulin receptor-associated protein	Alpha 2 macroglobulin acts as an antiprotease and is able to inactivate an enormous variety of proteinases	Tribolium castaneum	1395	gi|642913803|ref|XP_008201165.1|PREDICTED: alpha-2-macroglobulin receptor-associated protein [Tribolium castaneum] >gi|270002092|gb|EEZ98539.1| Alpha-2-macroglobulin receptor-associated protein-like Protein [Tribolium castaneum]	XP_008201165	5.92603e-157	80	462.611	346
contig_17755_78.81	78.81	Heat Shock/Stess Response	dnaj homolog subfamily c member 1-like		Tribolium castaneum	1591	gi|189239694|ref|XP_974769.2|PREDICTED: dnaJ homolog subfamily C member 1 [Tribolium castaneum] >gi|270011244|gb|EFA07692.1| Uncharacterized protein F54F2.9-like Protein [Tribolium castaneum]	XP_974769	2.6806e-170	78	501.13	403
contig_17898_65.12	65.12	Proteolysis	cathepsin l		Tenebrio molitor	2662	gi|751657229|gb|AJF94873.1|C1 family cathepsin L1 [Tenebrio molitor]	AJF94873	6.57204e-88	63	295.434	328
contig_1820_492.57	492.57	Proteolysis	matrix metalloproteinase-14 isoform x4		Dendroctonus ponderosae	1947	gi|546677987|gb|ERL88716.1|hypothetical protein D910_06098 [Dendroctonus ponderosae]	ERL88716	4.5935e-78	69	264.618	244
contig_18243_13.89	13.89	Metabolism	serine threonine kinase		Culex quinquefasciatus	711	gi|170033627|ref|XP_001844678.1|serine/threonine kinase [Culex quinquefasciatus] >gi|167874646|gb|EDS38029.1| serine/threonine kinase [Culex quinquefasciatus]	XP_001844678	3.19604e-53	86	179.874	109
contig_18350_67.04	67.04	Proteolysis	chymotrypsin-c isoform x1		Tribolium castaneum	2052	gi|642930915|ref|XP_008196139.1|PREDICTED: limulus clotting factor C isoform X2 [Tribolium castaneum] >gi|270012763|gb|EFA09211.1| serine protease P69 [Tribolium castaneum]	XP_008196139	1.16623e-159	68	481.871	479
contig_1842_804.49	804.49	Heat Shock/Stess Response	protein disulfide-isomerase a6	May function as a chaperone that inhibits aggregation of misfolded proteins	Tribolium castaneum	1626	gi|642911142|ref|XP_008200598.1|PREDICTED: protein disulfide-isomerase A6 [Tribolium castaneum] >gi|1004403664|gb|EFA11123.2| Protein disulfide-isomerase A6-like Protein [Tribolium castaneum]	XP_008200598	0	82	605.134	431
contig_18441_10.17	10.17	Cell Cycle & Processes	condensin complex subunit 1		Tribolium castaneum	956	gi|642919564|ref|XP_008191925.1|PREDICTED: condensin complex subunit 1 isoform X2 [Tribolium castaneum]	XP_008191925	4.83767e-79	72	273.092	280
contig_18593_56.01	56.01	Defense/Immune Response	palmitoyl-protein thioesterase 1		Dendroctonus ponderosae	1119	gi|546678868|gb|ERL89413.1|hypothetical protein D910_06780 [Dendroctonus ponderosae]	ERL89413	1.8716e-144	81	424.861	299
contig_18675_9.74	9.74	UNKN	transmembrane emp24 domain-containing protein bai		Blattella germanica	820	gi|237761908|emb|CAR94540.1|baiser CG11785-PA protein [Blattella germanica]	CAR94540	8.53292e-97	86	295.049	180
contig_18713_25.90	25.9	Signal Tranduction	tyrosine-protein kinase transmembrane receptor ror		Tribolium castaneum	2778	gi|642926286|ref|XP_008194862.1|PREDICTED: tyrosine-protein kinase transmembrane receptor Ror [Tribolium castaneum] >gi|1004399012|gb|EFA05483.2| Tyrosine-protein kinase transmembrane receptor Ror-like Protein [Tribolium castaneum]	XP_008194862	0	74	853.203	763
contig_1879_632.58	632.58	Heat Shock/Stess Response	endoplasmin		Tribolium castaneum	2697	gi|91089871|ref|XP_971540.1|PREDICTED: endoplasmin [Tribolium castaneum] >gi|270013565|gb|EFA10013.1| Heat shock protein 83-like Protein [Tribolium castaneum] >gi|570932729|gb|AHF20221.1| heat shock protein 90 [Tribolium castaneum]	XP_971540	0	91	1180.24	744
contig_1895_514.34	514.34	Carbohydrate Metabolism	dolichyl-diphosphooligosaccharide--protein glycosyltransferase subunit 2		Tribolium castaneum	2015	gi|91094833|ref|XP_971377.1|PREDICTED: dolichyl-diphosphooligosaccharide--protein glycosyltransferase subunit 2 [Tribolium castaneum] >gi|270006555|gb|EFA03003.1| Dolichyl-diphosphooligosaccharide--protein glycosyltransferase subunit 2-like Protein [Tribolium castaneum]	XP_971377	0	74	629.787	591
contig_1904_129.29	129.29	Proteolysis	e3 ubiquitin-protein ligase synoviolin a isoform x1		Tribolium castaneum	2567	gi|91087035|ref|XP_974421.1|PREDICTED: E3 ubiquitin-protein ligase synoviolin A [Tribolium castaneum] >gi|642929379|ref|XP_008195811.1| PREDICTED: E3 ubiquitin-protein ligase synoviolin A [Tribolium castaneum] >gi|270010520|gb|EFA06968.1| E3 ubiquitin-protein ligase HRD1-like Protein [Tribolium castaneum]	XP_974421	0	76	721.85	605
contig_19251_208.60	208.6	DNA Replication & Repair	multiprotein bridging factor 1	is an evolutionarily conserved transcriptional coactivator	Tribolium castaneum	379	gi|642916852|ref|XP_008199529.1|PREDICTED: endothelial differentiation-related factor 1 isoform X2 [Tribolium castaneum] >gi|1004402113|gb|EEZ99523.2| Endothelial differentiation-related factor 1-like Protein [Tribolium castaneum]	XP_008199529	2.72063e-40	97	142.895	73
contig_19256_96.91	96.91	UNKN	iron zinc purple acid phosphatase-like protein		Leptinotarsa decemlineata	2745	gi|549438521|gb|AGX25149.1|purple acid phosphatase-like protein [Leptinotarsa decemlineata]	AGX25149	0	87	678.322	433
contig_196_927.93	927.93	Heat Shock/Stess Response	erp60		Tribolium castaneum	1768	gi|91082695|ref|XP_971685.1|PREDICTED: protein disulfide-isomerase A3 [Tribolium castaneum] >gi|270014973|gb|EFA11421.1| Protein disulfide-isomerase-like Protein [Tribolium castaneum]	XP_971685	0	86	777.704	492
contig_19788_13.09	13.09	Translation	elongation factor 1 delta		Graphocephala atropunctata	593	gi|90820008|gb|ABD98761.1|putative elongation factor 1 delta [Graphocephala atropunctata]	ABD98761	5.85338e-54	96	185.267	113
contig_19831_19.90	19.9	Proteolysis	lysosomal aspartic protease		Pediculus humanus corporis	350	gi|242013446|ref|XP_002427417.1|Lysosomal aspartic protease precursor, putative [Pediculus humanus corporis] >gi|212511797|gb|EEB14679.1| Lysosomal aspartic protease precursor, putative [Pediculus humanus corporis]	XP_002427417	5.11016e-16	89	82.4185	48
contig_201_6.547.84	6547.84	Proteolysis	carboxypeptidase m		Tribolium castaneum	2555	gi|189241221|ref|XP_001812199.1|PREDICTED: carboxypeptidase D [Tribolium castaneum] >gi|1004396142|gb|EFA10782.2| carboxypeptidase A [Tribolium castaneum]	XP_001812199	5.26441e-144	69	447.203	415
contig_20176_14.51	14.51	Carbohydrate Metabolism	trehalase isoform x1	Trehalase is a glycoside hydrolase enzyme	Cephus cinctus	880	gi|1000743371|ref|XP_015594367.1|PREDICTED: trehalase-like isoform X3 [Cephus cinctus] >gi|1000743373|ref|XP_015594368.1| PREDICTED: trehalase-like isoform X3 [Cephus cinctus]	XP_015594367	2.7332e-70	70	241.891	210
contig_2024_316.95	316.95	UNKN	multiple coagulation factor deficiency protein 2 homolog		Tribolium castaneum	891	gi|91082581|ref|XP_967080.1|PREDICTED: multiple coagulation factor deficiency protein 2 isoform X1 [Tribolium castaneum] >gi|270015018|gb|EFA11466.1| Multiple coagulation factor deficiency protein 2 homolog-like Protein [Tribolium castaneum]	XP_967080	9.00365e-62	93	207.223	116
contig_20436_35.76	35.76	Signal Tranduction	tho complex subunit 1		Tribolium castaneum	1746	gi|91088827|ref|XP_970265.1|PREDICTED: THO complex subunit 1 [Tribolium castaneum] >gi|270012332|gb|EFA08780.1| THO complex subunit 1-like Protein [Tribolium castaneum]	XP_970265	8.62642e-152	79	464.151	361
contig_207_120.55	120.55	Nucleotide Metabolism	3 (2 ) -bisphosphate nucleotidase 1		Tribolium castaneum	1941	gi|642929514|ref|XP_008195868.1|PREDICTED: 3'(2'),5'-bisphosphate nucleotidase 1 isoform X2 [Tribolium castaneum] >gi|642929516|ref|XP_008195869.1| PREDICTED: 3'(2'),5'-bisphosphate nucleotidase 1 isoform X2 [Tribolium castaneum] >gi|270009600|gb|EFA06048.1| Putative inositol monophosphatase 3-like Protein [Tribolium castaneum]	XP_008195868	2.6442e-135	85	411.764	306
contig_20791_24.32	24.32	Fatty Acid & Lipid Metabolism	protein disulfide-isomerase a3	alkenyl glycerol ethers of both neutral lipid and phospholipid	Acyrthosiphon pisum	1947	gi|193713655|ref|XP_001950406.1|PREDICTED: protein disulfide-isomerase A3 [Acyrthosiphon pisum]	XP_001950406	0	97	924.08	490
contig_20985_18.77	18.77	Defense/Immune Response	calcium-binding protein cml24		Arabis alpina	439	gi|674240508|gb|KFK33273.1|hypothetical protein AALP_AA6G353700 [Arabis alpina]	KFK33273	1.52684e-06	62	54.299	66
contig_21064_14.97	14.97	Fatty Acid & Lipid Metabolism	gastric triacylglycerol lipase-like		Acyrthosiphon pisum	593	gi|328700272|ref|XP_003241200.1|PREDICTED: gastric triacylglycerol lipase-like [Acyrthosiphon pisum]	XP_003241200	2.99916e-106	95	326.25	166
contig_2123_696.53	696.53	Proteolysis	cathepsin l		Tribolium castaneum	535	gi|902940839|ref|NP_001298082.1|cathepsin L precursor [Tribolium castaneum] >gi|270001249|gb|EEZ97696.1| cathepsin L precursor [Tribolium castaneum]	NP_001298082	1.24687e-29	87	122.094	78
contig_2126_627.54	627.54	Proteolysis	cathepsin l		Tribolium castaneum	570	gi|902940839|ref|NP_001298082.1|cathepsin L precursor [Tribolium castaneum] >gi|270001249|gb|EEZ97696.1| cathepsin L precursor [Tribolium castaneum]	NP_001298082	4.21765e-47	82	169.088	117
contig_21860_32.07	32.07	Metabolism	alpha partial		Blaps mucronata	1523	gi|27450390|gb|AAO14612.1|AF462603_1alpha-amylase [Blaps mucronata]	AAO14612	0	76	659.833	488
contig_22088_10.29	10.29	Defense/Immune Response	protein drumstick		Tribolium castaneum	428	gi|91088521|ref|XP_971980.1|PREDICTED: protein drumstick isoform X2 [Tribolium castaneum]	XP_971980	2.33029e-40	91	142.124	81
contig_22111_15.47	15.47	UNKN	tan		Acyrthosiphon pisum	1130	gi|328706108|ref|XP_001943071.2|PREDICTED: uncharacterized protein LOC100164792 isoform X2 [Acyrthosiphon pisum]	XP_001943071	5.89944e-163	93	477.633	257
contig_22125_38.63	38.63	Translation	elongation factor 1 delta		Graphocephala atropunctata	867	gi|90820008|gb|ABD98761.1|putative elongation factor 1 delta [Graphocephala atropunctata]	ABD98761	1.74862e-60	84	205.297	206
contig_22596_11.48	11.48	RNA Processing	zinc finger rna-binding protein isoform x2		Acyrthosiphon pisum	306	gi|641671122|ref|XP_008185472.1|PREDICTED: zinc finger RNA-binding protein isoform X1 [Acyrthosiphon pisum]	XP_008185472	8.90256e-50	97	179.874	86
contig_22676_7.77	7.77	Fatty Acid & Lipid Metabolism	peroxisomal acyl-coenzyme a oxidase 3-like		Acyrthosiphon pisum	377	gi|193587201|ref|XP_001947058.1|PREDICTED: peroxisomal acyl-coenzyme A oxidase 3-like [Acyrthosiphon pisum] >gi|641675264|ref|XP_008186979.1| PREDICTED: peroxisomal acyl-coenzyme A oxidase 3-like [Acyrthosiphon pisum] >gi|641675267|ref|XP_008186980.1| PREDICTED: peroxisomal acyl-coenzyme A oxidase 3-like [Acyrthosiphon pisum] >gi|641675269|ref|XP_008186981.1| PREDICTED: peroxisomal acyl-coenzyme …	XP_001947058	7.57735e-73	97	241.506	125
contig_22752_42.56	42.56	Exocuticle-related	chitinase domain-containing protein 1	Chitinase	Tribolium castaneum	1319	gi|91088511|ref|XP_971647.1|PREDICTED: chitinase domain-containing protein 1 [Tribolium castaneum] >gi|270012228|gb|EFA08676.1| Chitinase domain-containing protein 1-like Protein [Tribolium castaneum]	XP_971647	1.67527e-140	71	420.624	367
contig_22849_12.09	12.09	Proteolysis	lysosomal alpha-glucosidase-like		Tribolium castaneum	1233	gi|91079350|ref|XP_969694.1|PREDICTED: lysosomal alpha-glucosidase [Tribolium castaneum] >gi|1004401792|gb|EEZ99945.2| Lysosomal alpha-glucosidase-like Protein [Tribolium castaneum]	XP_969694	3.31128e-76	64	266.929	282
contig_2302_934.26	934.26	Proteolysis	serine protease easter-like		Tenebrio molitor	1785	gi|315258628|dbj|BAG14262.2|44 kDa zymogen [Tenebrio molitor]	BAG14262	1.13254e-129	69	398.282	369
contig_2322_294.26	294.26	Proteolysis	proclotting enzyme		Tribolium castaneum	1337	gi|642911625|ref|XP_008200677.1|PREDICTED: trypsin I-P1 isoform X2 [Tribolium castaneum]	XP_008200677	5.31811e-156	75	460.299	370
contig_23785_38.58	38.58	Proteolysis	cathepsin b		Diabrotica virgifera virgifera	1181	gi|45822203|emb|CAE47498.1|cathepsin B-like proteinase [Diabrotica virgifera virgifera]	CAE47498	1.32607e-96	58	304.294	344
contig_238_3.486.19	3486.19	Proteolysis	matrix metalloproteinase-14 isoform x4		Dendroctonus ponderosae	972	gi|546677987|gb|ERL88716.1|hypothetical protein D910_06098 [Dendroctonus ponderosae]	ERL88716	2.33172e-77	73	252.677	240
contig_2396_595.28	595.28	Heat Shock/Stess Response	peptidyl-prolyl cis-trans isomerase 5		Tribolium castaneum	358	gi|91083463|ref|XP_971028.1|PREDICTED: peptidyl-prolyl cis-trans isomerase B [Tribolium castaneum] >gi|270010823|gb|EFA07271.1| Peptidyl-prolyl cis-trans isomerase-like Protein [Tribolium castaneum]	XP_971028	1.80347e-40	83	145.206	97
contig_2397_1.747.42	1747.42	Heat Shock/Stess Response	peptidyl-prolyl cis-trans isomerase 5		Tribolium castaneum	459	gi|91083463|ref|XP_971028.1|PREDICTED: peptidyl-prolyl cis-trans isomerase B [Tribolium castaneum] >gi|270010823|gb|EFA07271.1| Peptidyl-prolyl cis-trans isomerase-like Protein [Tribolium castaneum]	XP_971028	6.82995e-50	89	171.014	121
contig_24006_45.34	45.34	Proteolysis	serine protease easter		Tenebrio molitor	1500	gi|315258628|dbj|BAG14262.2|44 kDa zymogen [Tenebrio molitor]	BAG14262	7.5549e-135	72	408.297	370
contig_2401_40.81	40.81	Proteolysis	tpa_inf: cathepsin b		Aphis citricidus	1135	gi|161343879|tpg|DAA06120.1|TPA_inf: cathepsin B [Aphis citricidus]	DAA06120	0	97	643.654	340
contig_24472_7.35	7.35	Fatty Acid & Lipid Metabolism	n-acetylglucosaminyl transferase component gpi1		Sclerotinia sclerotiorum 1980	301	gi|156039495|ref|XP_001586855.1|hypothetical protein SS1G_11884 [Sclerotinia sclerotiorum 1980] >gi|154697621|gb|EDN97359.1| hypothetical protein SS1G_11884 [Sclerotinia sclerotiorum 1980 UF-70]	XP_001586855	1.03804e-60	99	206.838	100
contig_2448_1.082.92	1082.92	Proteolysis	matrix metalloproteinase 1 isoform x2		Tribolium castaneum	2992	gi|642923069|ref|XP_008193598.1|PREDICTED: matrix metalloproteinase 1 isoform X2 [Tribolium castaneum]	XP_008193598	0	85	783.097	523
contig_24593_37.83	37.83	Exocuticle-related	calreticulin		Drosophila virilis	1476	gi|968088836|ref|XP_002060216.2|uncharacterized protein Dvir_GJ22515 [Drosophila virilis] >gi|946558871|gb|EDW58213.2| uncharacterized protein Dvir_GJ22515 [Drosophila virilis]	XP_002060216	8.21368e-169	82	495.352	359
contig_2484_1.867.70	1867.7	Exocuticle-related	insect cuticle partial		Tribolium castaneum	2459	gi|642923955|ref|XP_008193939.1|PREDICTED: uncharacterized protein LOC100141833 [Tribolium castaneum]	XP_008193939	7.20519e-46	75	176.407	153
contig_25019_106.70	106.7	Fatty Acid & Lipid Metabolism	apolipoprotein d-like		Acyrthosiphon pisum	925	gi|641649326|ref|XP_001951488.2|PREDICTED: LOW QUALITY PROTEIN: apolipoprotein D [Acyrthosiphon pisum]	XP_001951488	5.56093e-131	91	384.415	213
contig_2506_966.95	966.95	UNKN	ferritin subunit		Fopius arisanus	1212	gi|755957653|ref|XP_011303826.1|PREDICTED: ferritin subunit isoform X1 [Fopius arisanus]	XP_011303826	2.78702e-82	77	263.848	191
contig_25077_32.22	32.22	Transport	thiamine transporter 1		Tribolium castaneum	783	gi|91085027|ref|XP_973943.1|PREDICTED: thiamine transporter 1 [Tribolium castaneum] >gi|642926240|ref|XP_008194841.1| PREDICTED: thiamine transporter 1 [Tribolium castaneum] >gi|1008442774|ref|XP_015836453.1| PREDICTED: thiamine transporter 1 [Tribolium castaneum] >gi|1008442776|ref|XP_015836454.1| PREDICTED: thiamine transporter 1 [Tribolium castaneum] >gi|270008518|gb|EFA04966.1| Thiamine trans…	XP_973943	8.67653e-90	82	285.034	197
contig_25215_72.80	72.8	OX-REDOX	retinol dehydrogenase 11		Tribolium castaneum	982	gi|642915782|ref|XP_008200076.1|PREDICTED: retinol dehydrogenase 11 [Tribolium castaneum] >gi|270003138|gb|EEZ99585.1| WW domain-containing oxidoreductase-like Protein [Tribolium castaneum]	XP_008200076	4.61514e-130	78	386.726	305
contig_2562_212.27	212.27	Fatty Acid & Lipid Metabolism	pancreatic triacylglycerol lipase-like isoform x2		Tribolium castaneum	4762	gi|189240775|ref|XP_969219.2|PREDICTED: pancreatic triacylglycerol lipase [Tribolium castaneum] >gi|1004396598|gb|KYB25598.1| Pancreatic triacylglycerol lipase-like Protein [Tribolium castaneum]	XP_969219	0	82	793.882	528
contig_25643_25.44	25.44	Detoxification	venom serine carboxypeptidase		Dendroctonus ponderosae	799	gi|478254749|gb|ENN74986.1|hypothetical protein YQE_08443, partial [Dendroctonus ponderosae]	ENN74986	4.06867e-75	74	241.891	190
contig_25848_41.96	41.96	Development	ecdysteroid udp-glucosyltransferase		Tribolium castaneum	351	gi|91081763|ref|XP_973188.1|PREDICTED: UDP-glucuronosyltransferase 2B20 [Tribolium castaneum] >gi|270005052|gb|EFA01500.1| Ecdysteroid UDP-glucosyltransferase-like Protein [Tribolium castaneum]	XP_973188	1.36957e-17	81	88.1965	65
contig_25849_100.06	100.06	Development	ecdysteroid udp-glucosyltransferase		Tribolium castaneum	384	gi|91081763|ref|XP_973188.1|PREDICTED: UDP-glucuronosyltransferase 2B20 [Tribolium castaneum] >gi|270005052|gb|EFA01500.1| Ecdysteroid UDP-glucosyltransferase-like Protein [Tribolium castaneum]	XP_973188	1.10408e-16	80	85.8853	65
contig_263_4.834.44	4834.44	Nucleotide Metabolism	nucleoside diphosphate kinase		Tribolium castaneum	768	gi|1008434434|ref|XP_967503.4|PREDICTED: nucleoside diphosphate kinase isoform X1 [Tribolium castaneum]	XP_967503	5.1983e-102	93	306.605	169
contig_2639_70.38	70.38	Proteolysis	furin-like protease 2 isoform x1		Tribolium castaneum	4314	gi|91076308|ref|XP_969307.1|PREDICTED: furin-like protease 2 [Tribolium castaneum]	XP_969307	0	77	1630.92	1210
contig_26944_11.88	11.88	Exocuticle-related	acidic mammalian chitinase-like isoform x1	Chitinase	Crassostrea gigas	452	gi|762099412|ref|XP_011432130.1|PREDICTED: acidic mammalian chitinase-like isoform X1 [Crassostrea gigas]	XP_011432130	1.72889e-05	59	53.9138	52
contig_26977_19.13	19.13	Na/K-ATPase	v-type proton atpase subunit s1		Acyrthosiphon pisum	1036	gi|274327605|ref|NP_001162140.1|uncharacterized protein LOC100169264 precursor [Acyrthosiphon pisum] >gi|239791130|dbj|BAH72074.1| ACYPI009898 [Acyrthosiphon pisum]	NP_001162140	0	90	555.444	317
contig_27_136.88	136.88	UNKN	transmembrane 9 superfamily member 4		Tribolium castaneum	2323	gi|1004399616|gb|KYB27333.1|Transmembrane 9 superfamily member 4-like Protein [Tribolium castaneum]	KYB27333	0	88	969.148	613
contig_2720_217.08	217.08	UNKN	selt-like protein		Tribolium castaneum	1651	gi|91083003|ref|XP_974477.1|PREDICTED: selT-like protein [Tribolium castaneum] >gi|270007025|gb|EFA03473.1| SelT-like protein [Tribolium castaneum]	XP_974477	2.22852e-89	88	286.189	172
contig_27309_11.09	11.09	Proteolysis	cathepsin b		Tenebrio molitor	366	gi|86279341|gb|ABC88766.1|putative cathepsin B-like like proteinase [Tenebrio molitor]	ABC88766	2.04129e-38	74	142.51	122
contig_27632_13.72	13.72	OX-REDOX	cytochrome b		Bradysia amoena	599	gi|254763531|gb|ACT80202.1|cytochrome b [Bradysia amoena]	ACT80202	3.35399e-66	79	219.935	179
contig_27833_24.55	24.55	Proteolysis	carboxypeptidase b-like		Limulus polyphemus	1578	gi|926649432|ref|XP_013791175.1|PREDICTED: carboxypeptidase B-like, partial [Limulus polyphemus]	XP_013791175	3.36317e-105	61	334.724	438
contig_27906_35.18	35.18	Proteolysis	carboxypeptidase e-like		Tribolium castaneum	1671	gi|189242016|ref|XP_001807518.1|PREDICTED: carboxypeptidase E [Tribolium castaneum] >gi|1004395402|gb|KYB24878.1| Carboxypeptidase D-like Protein [Tribolium castaneum]	XP_001807518	0	87	718.383	434
contig_2803_778.69	778.69	Proteolysis	lysosomal aspartic protease-like		Tribolium castaneum	1462	gi|91087085|ref|XP_974959.1|PREDICTED: aspartic proteinase A2 [Tribolium castaneum] >gi|1004398015|gb|KYB26436.1| Lysosomal aspartic protease-like Protein [Tribolium castaneum]	XP_974959	3.05445e-122	65	376.326	391
contig_28291_51.65	51.65	Exocuticle-related	endocuticle structural glycoprotein abd-4-like		Acyrthosiphon pisum	868	gi|240849399|ref|NP_001155786.1|RR1 cuticle protein 1 precursor [Acyrthosiphon pisum] >gi|239789436|dbj|BAH71343.1| ACYPI009006 [Acyrthosiphon pisum]	NP_001155786	1.55936e-59	86	198.364	135
contig_28848_5.25	5.25	Detoxification	cytochrome c oxidase assembly protein cox15 homolog		Acyrthosiphon pisum	465	gi|641675198|ref|XP_008186956.1|PREDICTED: cytochrome c oxidase assembly protein COX15 homolog [Acyrthosiphon pisum]	XP_008186956	2.06072e-64	93	214.542	129
contig_28922_19.66	19.66	Defense/Immune Response	myrosinase 1-like	Myrosinase is a family of enzymes involved in plant defense against herbivores	Tribolium castaneum	1995	gi|91087403|ref|XP_975666.1|PREDICTED: myrosinase 1 [Tribolium castaneum]	XP_975666	2.29243e-179	72	532.717	468
contig_29381_85.34	85.34	Proteolysis	cathepsin l-like proteinase		Tribolium castaneum	884	gi|283046734|ref|NP_001164314.1|cathepsin L precursor [Tribolium castaneum] >gi|270001247|gb|EEZ97694.1| cathepsin L precursor [Tribolium castaneum]	NP_001164314	1.62159e-70	65	233.417	253
contig_29466_27.03	27.03	Proteolysis	lysozyme 3		Acyrthosiphon pisum	1164	gi|240848843|ref|NP_001155465.1|uncharacterized protein LOC100160909 precursor [Acyrthosiphon pisum] >gi|239788427|dbj|BAH70897.1| ACYPI002175 [Acyrthosiphon pisum]	NP_001155465	6.49e-50	70	177.178	156
contig_29821_11.36	11.36	Fatty Acid & Lipid Metabolism	omega-3 fatty acid desaturase		Erysiphe necator	433	gi|730183138|gb|KHJ34345.1|putative omega-3 fatty acid desaturase [Erysiphe necator]	KHJ34345	2.0827e-99	100	305.449	144
contig_30125_15.57	15.57	Carbohydrate Metabolism	glycosyl hydrolase family 43		Thermoanaerobacterium thermosaccharolyticum M0795	823	gi|433293526|gb|AGB19348.1|putative beta-xylosidase [Thermoanaerobacterium thermosaccharolyticum M0795]	AGB19348	5.9927e-55	60	192.971	243
contig_30379_30.44	30.44	Transport	ionotropic receptor		Colaphellus bowringi	834	gi|959478442|gb|ALR72535.1|ionotropic receptor IR6 [Colaphellus bowringi]	ALR72535	3.33963e-97	82	317.39	229
contig_30404_12.94	12.94	UNKN	zinc finger bed domain-containing protein 4-like		Microplitis demolitor	660	gi|939670885|ref|XP_014298239.1|PREDICTED: zinc finger BED domain-containing protein 1-like [Microplitis demolitor]	XP_014298239	1.52023e-47	87	171.4	108
contig_30589_89.97	89.97	Defense/Immune Response	protein disulfide-isomerase a5		Oryctes borbonicus	1349	gi|952513542|gb|KRT80104.1|Thioredoxin [Oryctes borbonicus]	KRT80104	1.23725e-179	84	529.635	375
contig_30650_31.17	31.17	Heat Shock/Stess Response	peptidyl-prolyl cis-trans isomerase b		Halyomorpha halys	809	gi|939688455|ref|XP_014288129.1|PREDICTED: peptidyl-prolyl cis-trans isomerase B [Halyomorpha halys]	XP_014288129	2.20714e-92	84	284.648	204
contig_307_21.26	21.26	Signal Tranduction	dep domain-containing protein 5 isoform x1		Tribolium castaneum	2464	gi|642934828|ref|XP_008197827.1|PREDICTED: DEP domain-containing protein 5 isoform X3 [Tribolium castaneum]	XP_008197827	8.15542e-119	83	369.392	238
contig_30951_20.22	20.22	Proteolysis	cathepsin b-like proteinase		Acyrthosiphon pisum	414	gi|187097096|ref|NP_001119608.1|cathepsin B-348 precursor [Acyrthosiphon pisum] >gi|161343833|tpg|DAA06097.1| TPA_inf: cathepsin B [Acyrthosiphon pisum]	NP_001119608	1.37641e-10	71	67.781	63
contig_31184_61.23	61.23	Defense/Immune Response	myrosinase 1-like		Tribolium castaneum	1519	gi|91087403|ref|XP_975666.1|PREDICTED: myrosinase 1 [Tribolium castaneum]	XP_975666	0	70	545.043	485
contig_3173_149.34	149.34	Proteolysis	e3 ubiquitin-protein ligase rnf13-like		Tribolium castaneum	2203	gi|91095001|ref|XP_969305.1|PREDICTED: E3 ubiquitin-protein ligase RNF13 [Tribolium castaneum] >gi|270015391|gb|EFA11839.1| E3 ubiquitin-protein ligase RNF13-like Protein [Tribolium castaneum]	XP_969305	6.39441e-138	86	424.091	330
contig_31779_23.66	23.66	Proteolysis	fk506-binding protein 2 isoform x2		Monomorium pharaonis	1095	gi|826500934|ref|XP_012542000.1|PREDICTED: FK506-binding protein 2 isoform X2 [Monomorium pharaonis]	XP_012542000	7.76734e-90	76	282.337	215
contig_3210_112.51	112.51	Heat Shock/Stess Response	2-hydroxyacylsphingosine 1-beta-galactosyltransferase-like		Tribolium castaneum	1898	gi|91090214|ref|XP_967924.1|PREDICTED: 2-hydroxyacylsphingosine 1-beta-galactosyltransferase-like [Tribolium castaneum]	XP_967924	5.45713e-167	69	500.36	476
contig_3229_155.84	155.84	Other	endoplasmic reticulum resident protein 44 isoform x2		Tribolium castaneum	1875	gi|91092520|ref|XP_971182.1|PREDICTED: endoplasmic reticulum resident protein 44 [Tribolium castaneum] >gi|270012869|gb|EFA09317.1| Protein disulfide-isomerase-like Protein [Tribolium castaneum]	XP_971182	0	89	657.907	394
contig_32328_36.77	36.77	Proteolysis	tpa_inf: cathepsin b		Aphis gossypii	444	gi|161343827|tpg|DAA06094.1|TPA_inf: cathepsin B [Aphis gossypii]	DAA06094	4.27619e-50	94	171.4	105
contig_32397_26.90	26.9	Fatty Acid & Lipid Metabolism	protein disulfide-isomerase		Acyrthosiphon pisum	1892	gi|641664855|ref|XP_008183165.1|PREDICTED: protein disulfide-isomerase [Acyrthosiphon pisum]	XP_008183165	0	98	909.057	481
contig_32918_7.17	7.17	UNKN	calcium-translocating p-type pmca-type		Saitoella complicata NRRL Y-17804	309	gi|813209756|dbj|GAO49430.1|hypothetical protein G7K_3580-t1 [Saitoella complicata NRRL Y-17804]	GAO49430	8.25249e-19	69	92.4337	96
contig_33557_56.94	56.94	Exocuticle-related	chitinase-like protein en03	Chitinase	Diuraphis noxia	1727	gi|985401705|ref|XP_015368583.1|PREDICTED: chitinase-like protein EN03 [Diuraphis noxia]	XP_015368583	0	98	885.174	442
contig_33885_135.93	135.93	Nucleotide Metabolism	nucleoside diphosphate kinase		Diuraphis noxia	689	gi|985411874|ref|XP_015371417.1|PREDICTED: nucleoside diphosphate kinase-like isoform X1 [Diuraphis noxia]	XP_015371417	1.26825e-109	99	325.094	160
contig_34232_29.00	29	Proteolysis	cathepsin l		Aphis gossypii	1377	gi|262410743|gb|ACY66807.1|cathepsin L [Aphis gossypii]	ACY66807	0	98	701.434	341
contig_35678_16.97	16.97	Heat Shock/Stess Response	heat shock 70 kda protein cognate 3- partial		Wasmannia auropunctata	573	gi|780722018|ref|XP_011707184.1|PREDICTED: heat shock 70 kDa protein cognate 3-like, partial [Wasmannia auropunctata]	XP_011707184	1.24795e-64	89	209.534	123
contig_35883_8.31	8.31	Defense/Immune Response	glucan endo- -beta-d-glucosidase		Gammaproteobacteria bacterium Q1	786	gi|921092781|ref|WP_053084583.1|hypothetical protein [Gammaproteobacteria bacterium Q1]	WP_053084583	4.01677e-43	68	160.999	137
contig_3604_177.80	177.8	Cell Cycle & Processes	cysteine-rich with egf-like domain protein 2	this protein may function as a cell adhesion molecule	Tribolium castaneum	1769	gi|91095041|ref|XP_971778.1|PREDICTED: cysteine-rich with EGF-like domain protein 2 [Tribolium castaneum] >gi|270014762|gb|EFA11210.1| Cysteine-rich with EGF-like domain protein 2 [Tribolium castaneum]	XP_971778	5.6663e-175	81	513.457	373
contig_36070_9.41	9.41	Na/K-ATPase	v-type proton atpase subunit b		Diaphorina citri	577	gi|662208619|ref|XP_008477869.1|PREDICTED: V-type proton ATPase subunit B, partial [Diaphorina citri]	XP_008477869	1.08892e-66	98	213.772	105
contig_36649_34.80	34.8	Proteolysis	cathepsin b		Tribolium castaneum	1097	gi|282400164|ref|NP_001164205.1|cathepsin B precursor [Tribolium castaneum] >gi|270004839|gb|EFA01287.1| cathepsin B precursor [Tribolium castaneum]	NP_001164205	1.50373e-115	71	352.058	326
contig_36809_9.34	9.34	Proteolysis	serine (or cysteine) peptidase clade member 3k		Diuraphis noxia	590	gi|985396602|ref|XP_015365804.1|PREDICTED: leukocyte elastase inhibitor-like [Diuraphis noxia]	XP_015365804	5.38799e-60	81	207.608	186
contig_36865_9.26	9.26	Defense/Immune Response	thioredoxin-like protein 1		Halyomorpha halys	349	gi|939638592|ref|XP_014270327.1|PREDICTED: thioredoxin-like protein 1 [Halyomorpha halys]	XP_014270327	3.42898e-07	85	56.9954	34
contig_37_407.73	407.73	Translation	translocon-associated protein subunit alpha		Tribolium castaneum	1440	gi|91079082|ref|XP_975256.1|PREDICTED: translocon-associated protein subunit alpha [Tribolium castaneum] >gi|270004205|gb|EFA00653.1| Translocon-associated protein subunit alpha-like Protein [Tribolium castaneum]	XP_975256	5.51309e-113	88	347.821	261
contig_37210_39.33	39.33	OX-REDOX	ferritin subunit		Graphocephala atropunctata	915	gi|90819988|gb|ABD98751.1|putative ferritin [Graphocephala atropunctata]	ABD98751	1.23962e-102	85	311.997	201
contig_37402_25.24	25.24	Carbohydrate Metabolism	beta- -galactosyltransferase 5		Tribolium castaneum	1668	gi|1008434805|ref|XP_015834252.1|PREDICTED: beta-1,3-galactosyltransferase 5 [Tribolium castaneum]	XP_015834252	5.32596e-110	71	345.51	293
contig_37455_6.06	6.06	RNA Processing	pre-mrna-splicing factor rbm22		Acyrthosiphon pisum	413	gi|239792619|dbj|BAH72632.1|ACYPI009745 [Acyrthosiphon pisum]	BAH72632	4.80861e-30	100	119.783	55
contig_377_588.50	588.5	Heat Shock/Stess Response	calnexin		Tribolium castaneum	2358	gi|91080995|ref|XP_975051.1|PREDICTED: calnexin [Tribolium castaneum] >gi|642919970|ref|XP_008192150.1| PREDICTED: calnexin [Tribolium castaneum] >gi|642919972|ref|XP_008192151.1| PREDICTED: calnexin [Tribolium castaneum] >gi|270005348|gb|EFA01796.1| Calreticulin-like Protein [Tribolium castaneum]	XP_975051	0	82	735.332	513
contig_3774_344.70	344.7	Heat Shock/Stess Response	fk506-binding protein 2 isoform x2		Neodiprion lecontei	1307	gi|998497558|ref|XP_015524554.1|PREDICTED: FK506-binding protein 2 isoform X2 [Neodiprion lecontei]	XP_015524554	5.35539e-29	87	124.02	81
contig_37815_7.56	7.56	Proteolysis	venom protease-like		Diuraphis noxia	492	gi|985387426|ref|XP_015374853.1|PREDICTED: uncharacterized protein LOC107169577 [Diuraphis noxia]	XP_015374853	2.3428e-54	72	194.126	159
contig_38360_43.49	43.49	Proteolysis	tpa_inf: cathepsin b		Aphis citricidus	1244	gi|52630945|gb|AAU84936.1|putative cathepsin B-S [Aphis citricidus]	AAU84936	0	91	580.867	335
contig_38428_8.28	8.28	Fatty Acid & Lipid Metabolism	palmitoyltransferase zdhhc3	catalyzing the transfer of the acyl group of a long-chain fatty acyl-CoA from coenzyme A to l-carnitine.	Diuraphis noxia	339	gi|985393576|ref|XP_015364144.1|PREDICTED: palmitoyltransferase ZDHHC3 [Diuraphis noxia]	XP_015364144	6.43458e-66	100	213.001	112
contig_38461_23.82	23.82	Heat Shock/Stess Response	heat shock protein 70		Tenebrio molitor	427	gi|380854589|gb|AFE88579.1|heat shock protein 70 [Tenebrio molitor] >gi|380854591|gb|AFE88580.1| heat shock protein 70 [Tenebrio molitor]	AFE88579	1.49861e-56	100	197.978	92
contig_3851_87.99	87.99	Proteolysis	cathepsin b		Ixodes scapularis	1225	gi|240992699|ref|XP_002404474.1|cathepsin B endopeptidase, putative [Ixodes scapularis] >gi|215491571|gb|EEC01212.1| cathepsin B endopeptidase, putative [Ixodes scapularis]	XP_002404474	3.45634e-137	74	409.068	311
contig_38761_36.91	36.91	Exocuticle-related	juvenile hormone epoxide hydrolase 1-like protein		Tribolium castaneum	808	gi|270004120|gb|EFA00568.1|Juvenile hormone epoxide hydrolase 1-like Protein [Tribolium castaneum]	EFA00568	3.45596e-83	77	269.24	208
contig_3893_50.00	50	OX-REDOX	nadh dehydrogenase subunit 4		Zymoseptoria tritici	1461	gi|164422131|ref|YP_001648745.1|NADH dehydrogenase subunit 4 [Zymoseptoria tritici] >gi|155964394|gb|ABU40261.1| NADH dehydrogenase subunit 4 (mitochondrion) [Zymoseptoria tritici]	YP_001648745	0	93	544.273	476
contig_39141_10.59	10.59	Defense/Immune Response	methylmalonyl- partial	is the thioester consisting of coenzyme A	Blastocladiella emersonii	364	gi|117422548|gb|ABK34897.1|methylmalonyl-CoA-mutase [Blastocladiella emersonii]	ABK34897	2.46714e-65	91	209.92	120
contig_3939_278.97	278.97	Proteolysis	matrix metalloproteinase-25-like		Tribolium castaneum	2266	gi|1004396302|gb|EFA10593.2|Matrix metalloproteinase-16-like Protein [Tribolium castaneum]	EFA10593	3.10721e-85	73	292.352	264
contig_39583_15.68	15.68	Carbohydrate Metabolism	dolichyl-diphosphooligosaccharide--protein glycosyltransferase subunit 4		Sarcoptes scabiei	361	gi|934154615|gb|KPM05148.1|Oligosaccaryltransferase domain containing protein [Sarcoptes scabiei]	KPM05148	1.75019e-10	69	63.1586	59
contig_40390_7.31	7.31	DNA Replication & Repair	dna helicase mcm8-like		Diuraphis noxia	344	gi|985389934|ref|XP_015379596.1|PREDICTED: DNA helicase MCM8-like isoform X1 [Diuraphis noxia]	XP_015379596	6.46971e-71	99	237.654	114
contig_41585_20.37	20.37	UNKN	zinc finger mym-type protein 1-like		Hydra vulgaris	1545	gi|449667647|ref|XP_004206610.1|PREDICTED: zinc finger MYM-type protein 1-like [Hydra vulgaris]	XP_004206610	1.17108e-19	65	73.9442	97
contig_4182_325.16	325.16	Carbohydrate Metabolism	dolichyl-diphosphooligosaccharide--protein glycosyltransferase 48 kda subunit		Tribolium castaneum	1387	gi|1008452053|ref|XP_969003.3|PREDICTED: dolichyl-diphosphooligosaccharide--protein glycosyltransferase 48 kDa subunit [Tribolium castaneum]	XP_969003	0	84	651.744	425
contig_42101_10.60	10.6	DNA Replication & Repair	dna replication licensing factor mcm7		Dendroctonus ponderosae	380	gi|546684449|gb|ERL94088.1|hypothetical protein D910_11370 [Dendroctonus ponderosae]	ERL94088	2.85328e-44	83	163.31	125
contig_42212_39.29	39.29	Carbohydrate Metabolism	glucose dehydrogenase		FAD, quinone isoform X2	2226	gi|642926449|ref|XP_008191964.1|PREDICTED: glucose dehydrogenase [FAD, quinone] isoform X2 [Tribolium castaneum] >gi|642926451|ref|XP_008191965.1| PREDICTED: glucose dehydrogenase [FAD, quinone] isoform X2 [Tribolium castaneum]	XP_008191964	0	64	544.273	608
contig_42508_20.58	20.58	Fatty Acid & Lipid Metabolism	prostatic acid phosphatase	Prostatic acid phosphatase degrades lysophosphatidic acid in seminal plasma	Cryptolaemus montrouzieri	347	gi|972974383|gb|ALW95355.1|acid phosphatase, partial [Cryptolaemus montrouzieri]	ALW95355	2.22594e-18	68	88.5817	69
contig_4255_159.29	159.29	UNKN	transmembrane protein 179		Tribolium castaneum	2305	gi|91089221|ref|XP_967681.1|PREDICTED: transmembrane protein 179 [Tribolium castaneum] >gi|270011474|gb|EFA07922.1| Transmembrane protein 179-like Protein [Tribolium castaneum]	XP_967681	7.12778e-94	91	305.064	169
contig_43342_9.59	9.59	Transport	probable multidrug resistance-associated protein lethal 03659 isoform x1		Tribolium castaneum	407	gi|1008438454|ref|XP_015835266.1|PREDICTED: probable multidrug resistance-associated protein lethal(2)03659 isoform X3 [Tribolium castaneum]	XP_015835266	3.69411e-32	65	132.109	142
contig_4421_453.30	453.3	Other	nucleobindin-2 isoform x2	Encodes a protein with a suggested role in calcium level maintenance, eating regulation in the hypothalamus, and release of tumor necrosis factor from vascular endothelial cells.	Tribolium castaneum	2421	gi|189235372|ref|XP_968511.2|PREDICTED: nucleobindin-2 [Tribolium castaneum] >gi|270004247|gb|EFA00695.1| Nucleobindin-2-like Protein [Tribolium castaneum]	XP_968511	1.70172e-128	80	408.297	407
contig_4489_110.79	110.79	Cell Cycle & Processes	collagen alpha-1 chain		Tribolium castaneum	5749	gi|1008433178|ref|XP_015833709.1|PREDICTED: collagen alpha-1(XVIII) chain [Tribolium castaneum]	XP_015833709	1.65821e-149	74	499.975	636
contig_4502_405.50	405.5	Defense/Immune Response	thioredoxin-related transmembrane protein 1		Tribolium castaneum	2272	gi|642918507|ref|XP_008191501.1|PREDICTED: thioredoxin-related transmembrane protein 1 [Tribolium castaneum] >gi|270003220|gb|EEZ99667.1| Thioredoxin-related transmembrane protein 1-like Protein [Tribolium castaneum]	XP_008191501	4.86582e-85	88	282.722	199
contig_45108_8.43	8.43	Heat Shock/Stess Response	calnexin		Papilio machaon	321	gi|930676003|gb|KPJ16233.1|Calmegin [Papilio machaon]	KPJ16233	9.08895e-09	60	60.077	78
contig_45139_8.68	8.68	RNA Processing	heterogeneous nuclear ribonucleoprotein h3 isoform x2		Ceratosolen solmsi marchali	637	gi|766936620|ref|XP_011500729.1|PREDICTED: heterogeneous nuclear ribonucleoprotein H2 [Ceratosolen solmsi marchali]	XP_011500729	6.53167e-18	46	91.2781	197
contig_4552_698.03	698.03	Proteolysis	serine protease 42-like isoform x3		Tribolium castaneum	988	gi|91077984|ref|XP_968658.1|PREDICTED: serine protease 42 [Tribolium castaneum] >gi|270002734|gb|EEZ99181.1| serine protease H2 [Tribolium castaneum]	XP_968658	9.61181e-139	86	412.149	266
contig_4586_722.88	722.88	Exocuticle-related	chitinase 2-like protein	Chitinase	Tribolium castaneum	1361	gi|86515372|ref|NP_001034515.1|chitinase 3 precursor [Tribolium castaneum] >gi|58220084|gb|AAW67570.1| chitinase 3 [Tribolium castaneum]	NP_001034515	7.59772e-156	77	459.914	363
contig_46319_14.05	14.05	Carbohydrate Metabolism	keratinocyte-associated protein 2		Acyrthosiphon pisum	636	gi|240848961|ref|NP_001155495.1|keratinocyte-associated protein 2-like precursor [Acyrthosiphon pisum] >gi|985416555|ref|XP_015373730.1| PREDICTED: protein KRTCAP2 homolog [Diuraphis noxia] >gi|239789342|dbj|BAH71301.1| ACYPI002809 [Acyrthosiphon pisum]	NP_001155495	4.93107e-79	99	245.358	129
contig_46388_34.70	34.7	UNKN	ephrin-b2 isoform x2		Tribolium castaneum	853	gi|642929828|ref|XP_008195992.1|PREDICTED: ephrin-B1 [Tribolium castaneum] >gi|270010986|gb|EFA07434.1| Ephrin-B1-like Protein [Tribolium castaneum]	XP_008195992	3.91276e-87	91	273.478	148
contig_46950_17.51	17.51	Transport	tetrameric potassium-selective cyclic nucleotide gated channel		Amyelois transitella	649	gi|913299964|ref|XP_013198294.1|PREDICTED: uncharacterized protein LOC106141179 [Amyelois transitella]	XP_013198294	1.25281e-20	52	101.679	209
contig_46976_20.28	20.28	Transport	pickpocket protein 28		Tribolium castaneum	1081	gi|91089113|ref|XP_972237.1|PREDICTED: pickpocket protein 28 [Tribolium castaneum]	XP_972237	3.7529e-79	58	264.233	351
contig_47138_7.15	7.15	Fatty Acid & Lipid Metabolism	ribosome biogenesis protein enp2 homolog		Schizosaccharomyces pombe 972h-	358	gi|924121541|emb|CUA71079.1|Ribosome biogenesis protein enp2 homolog [Schizosaccharomyces pombe 972h-] [Rhizoctonia solani]	CUA71079	1.38676e-46	83	172.555	118
contig_4752_408.99	408.99	Signal Tranduction	sparc		Tribolium castaneum	1501	gi|91076986|ref|XP_975465.1|PREDICTED: SPARC [Tribolium castaneum] >gi|270001994|gb|EEZ98441.1| SPARC-like Protein [Tribolium castaneum]	XP_975465	1.12951e-118	78	363.229	276
contig_47624_7.55	7.55	Proteolysis	matrix metalloproteinase-24-like		Tribolium castaneum	662	gi|1008432856|ref|XP_015833621.1|PREDICTED: collagenase 3-like [Tribolium castaneum]	XP_015833621	2.54159e-16	54	87.8113	142
contig_47771_11.97	11.97	Proteolysis	serine protease		Culex quinquefasciatus	638	gi|170066901|ref|XP_001868269.1|thymus-specific serine protease [Culex quinquefasciatus] >gi|167863077|gb|EDS26460.1| thymus-specific serine protease [Culex quinquefasciatus]	XP_001868269	2.71169e-47	62	173.711	166
contig_4785_359.28	359.28	Metabolism	multiple inositol polyphosphate phosphatase 1		Tribolium castaneum	1921	gi|1008449210|ref|XP_015838212.1|PREDICTED: LOW QUALITY PROTEIN: multiple inositol polyphosphate phosphatase 1 [Tribolium castaneum]	XP_015838212	6.01115e-156	69	469.544	433
contig_47947_51.00	51	Proteolysis	trypsin		Anopheles gambiae str. PEST	865	gi|58389641|ref|XP_317172.2|AGAP008293-PA [Anopheles gambiae str. PEST] >gi|97537546|sp|P35041.2|TRY7_ANOGA RecName: Full=Trypsin-7; Flags: Precursor >gi|55237401|gb|EAA12262.3| AGAP008293-PA [Anopheles gambiae str. PEST]	XP_317172	7.48789e-65	63	216.468	238
contig_4847_145.74	145.74	OX-REDOX	peptidylglycine alpha-hydroxylating monooxygenase		Tribolium castaneum	3882	gi|91081201|ref|XP_975610.1|PREDICTED: peptidylglycine alpha-hydroxylating monooxygenase [Tribolium castaneum] >gi|270005264|gb|EFA01712.1| Peptidylglycine alpha-hydroxylating monooxygenase-like Protein [Tribolium castaneum]	XP_975610	2.71301e-151	78	472.626	341
contig_4901_162.49	162.49	Sensory Response	hypoxia up-regulated protein 1 isoform x1		Tribolium castaneum	3143	gi|91080263|ref|XP_973490.1|PREDICTED: hypoxia up-regulated protein 1 [Tribolium castaneum] >gi|270005695|gb|EFA02143.1| Hypoxia up-regulated protein 1-like Protein [Tribolium castaneum]	XP_973490	0	82	1109.75	841
contig_49087_8.28	8.28	Proteolysis	serine protease easter		Operophtera brumata	513	gi|914556235|gb|KOB65612.1|Uncharacterized protein OBRU01_17104 [Operophtera brumata]	KOB65612	9.9934e-24	58	103.219	138
contig_4921_107.89	107.89	Proteolysis	er degradation-enhancing alpha-mannosidase-like protein 2		Tribolium castaneum	2127	gi|91080889|ref|XP_973062.1|PREDICTED: ER degradation-enhancing alpha-mannosidase-like protein 2 [Tribolium castaneum] >gi|270005396|gb|EFA01844.1| Mannosyl-oligosaccharide alpha-1,2-mannosidase isoform A-like Protein [Tribolium castaneum]	XP_973062	0	84	971.074	654
contig_49276_10.73	10.73	Exocuticle-related	cuticle protein 19-like		Diuraphis noxia	785	gi|985394920|ref|XP_015364882.1|PREDICTED: cuticle protein 19-like [Diuraphis noxia] >gi|985394922|ref|XP_015364883.1| PREDICTED: cuticle protein 19-like [Diuraphis noxia]	XP_015364882	1.54969e-57	97	191.815	117
contig_50028_8.15	8.15	Transport	general substrate transporter		Wallemia mellicola CBS 633.66	330	gi|588258877|ref|XP_006958599.1|hypothetical protein WALSEDRAFT_69117 [Wallemia mellicola CBS 633.66] >gi|388580933|gb|EIM21244.1| hypothetical protein WALSEDRAFT_69117 [Wallemia mellicola CBS 633.66]	XP_006958599	1.62893e-70	100	232.646	110
contig_50103_11.14	11.14	Transport	sugar phosphate exchanger 2 isoform x1		Acyrthosiphon pisum	1043	gi|641662114|ref|XP_008182132.1|PREDICTED: sugar phosphate exchanger 2 isoform X4 [Acyrthosiphon pisum]	XP_008182132	2.83358e-78	99	260.381	138
contig_50416_28.49	28.49	Defense/Immune Response	thaumatin-like protein 1b	These results suggest that the AdTLP is a good candidate gene for enhancing stress resistance in crop plants.	Plasmodiophora brassicae	757	gi|857979243|emb|CEO94762.1|hypothetical protein PBRA_003575 [Plasmodiophora brassicae]	CEO94762	8.34883e-29	45	120.168	231
contig_51498_28.86	28.86	Fatty Acid & Lipid Metabolism	group xv phospholipase a2-like		Tribolium castaneum	1522	gi|1008440479|ref|XP_015835827.1|PREDICTED: group XV phospholipase A2 [Tribolium castaneum] >gi|270007779|gb|EFA04227.1| Group XV phospholipase A2-like Protein [Tribolium castaneum]	XP_015835827	0	85	604.749	398
contig_51543_9.99	9.99	Na/K-ATPase	soluble calcium-activated nucleotidase 1		Acyrthosiphon pisum	488	gi|641679008|ref|XP_001947326.3|PREDICTED: apyrase-like, partial [Acyrthosiphon pisum]	XP_001947326	2.66896e-48	78	169.474	142
contig_52058_19.64	19.64	Defense/Immune Response	endoplasmin		Hordeum vulgare subsp. vulgare	983	gi|326532784|dbj|BAJ89237.1|predicted protein [Hordeum vulgare subsp. vulgare]	BAJ89237	1.76956e-166	97	496.123	264
contig_5218_685.59	685.59	Fatty Acid & Lipid Metabolism	probable serine incorporator isoform x3		Tribolium castaneum	1814	gi|642923926|ref|XP_008193930.1|PREDICTED: probable serine incorporator isoform X3 [Tribolium castaneum]	XP_008193930	1.68793e-171	82	508.449	461
contig_52348_6.79	6.79	Fatty Acid & Lipid Metabolism	gastric triacylglycerol lipase-like	Enhances the incorporation of serine into phosphatidylserine and sphingolipids.	Hydra vulgaris	347	gi|449665365|ref|XP_002163647.2|PREDICTED: gastric triacylglycerol lipase-like [Hydra vulgaris]	XP_002163647	7.06192e-28	72	115.546	97
contig_53204_11.35	11.35	OX-REDOX	laccase-like multicopper oxidase 1		Culex pipiens pallens	1924	gi|195984431|gb|ACG63789.1|laccase-like protein [Culex pipiens pallens]	ACG63789	0	86	860.136	542
contig_53464_5.03	5.03	OX-REDOX	deoxyhypusine hydroxylase		Dufourea novaeangliae	538	gi|987900740|ref|XP_015434073.1|PREDICTED: deoxyhypusine hydroxylase [Dufourea novaeangliae]	XP_015434073	4.56317e-25	72	99.3673	103
contig_53600_5.84	5.84	Translation	30s ribosomal protein s27ae		Mucor circinelloides f. circinelloides 1006PhL	422	gi|511006499|gb|EPB87809.1|hypothetical protein HMPREF1544_05338 [Mucor circinelloides f. circinelloides 1006PhL]	EPB87809	2.44676e-19	100	89.7373	58
contig_54801_10.88	10.88	Transport	trafficking protein particle complex subunit 4		Tribolium castaneum	320	gi|91081497|ref|XP_974526.1|PREDICTED: trafficking protein particle complex subunit 4 [Tribolium castaneum] >gi|270005142|gb|EFA01590.1| Trafficking protein particle complex subunit 4-like Protein [Tribolium castaneum]	XP_974526	1.87913e-60	94	196.438	106
contig_55033_15.92	15.92	Sensory Response	limbic system-associated membrane protein		Tribolium castaneum	1181	gi|91088303|ref|XP_969204.1|PREDICTED: MAM domain-containing glycosylphosphatidylinositol anchor protein 2 [Tribolium castaneum] >gi|270012163|gb|EFA08611.1| Down syndrome cell adhesion molecule-like protein Dscam2 [Tribolium castaneum]	XP_969204	3.58983e-140	83	420.239	293
contig_55190_7.89	7.89	Translation	translocon-associated protein subunit delta		Diuraphis noxia	884	gi|985412775|ref|XP_015371914.1|PREDICTED: translocon-associated protein subunit delta [Diuraphis noxia]	XP_015371914	3.51814e-109	98	326.25	164
contig_5565_24.21	24.21	RNA Processing	serine threonine-protein kinase endoribonuclease ire1		Tribolium castaneum	2599	gi|642931541|ref|XP_008196629.1|PREDICTED: serine/threonine-protein kinase/endoribonuclease IRE1 [Tribolium castaneum] >gi|270012165|gb|EFA08613.1| Serine/threonine-protein kinase/endoribonuclease IRE2-like Protein [Tribolium castaneum]	XP_008196629	0	81	1087.79	777
contig_55829_7.31	7.31	Carbohydrate Metabolism	glycoside hydrolase deacetylase		Erysiphe necator	1401	gi|730182330|gb|KHJ34002.1|putative glycoside hydrolase deacetylase [Erysiphe necator]	KHJ34002	0	92	657.136	353
contig_56282_29.96	29.96	Metabolism	bis(5 -adenosyl)-triphosphatase enpp4-like		Tribolium castaneum	646	gi|1008433684|ref|XP_015833868.1|PREDICTED: ectonucleotide pyrophosphatase/phosphodiesterase family member 5 isoform X2 [Tribolium castaneum]	XP_015833868	1.24952e-55	78	194.512	139
contig_56288_9.34	9.34	Carbohydrate Metabolism	beta-galactosidase-1-like protein 2	is a glycoside hydrolase enzyme	Tribolium castaneum	304	gi|91078182|ref|XP_967647.1|PREDICTED: beta-galactosidase-1-like protein 2 [Tribolium castaneum] >gi|270001359|gb|EEZ97806.1| Beta-galactosidase-1-like protein 2 [Tribolium castaneum]	XP_967647	1.58933e-38	86	146.362	89
contig_5702_61.68	61.68	Transport	solute carrier family 35 member f5		Tribolium castaneum	5162	gi|642928007|ref|XP_008200118.1|PREDICTED: solute carrier family 35, member F5 isoform X1 [Tribolium castaneum]	XP_008200118	8.17092e-173	84	543.117	434
contig_5704_180.64	180.64	Heat Shock/Stess Response	dnaj homolog subfamily b member 11		Tribolium castaneum	1635	gi|91082963|ref|XP_973727.1|PREDICTED: dnaJ homolog subfamily B member 11 [Tribolium castaneum] >gi|1004399336|gb|EFA03492.2| DnaJ homolog subfamily B member 11-like Protein [Tribolium castaneum]	XP_973727	0	93	593.193	357
contig_57301_6.53	6.53	Transport	cationic amino acid transporter 3 isoform x1		Acyrthosiphon pisum	490	gi|328715005|ref|XP_001944828.2|PREDICTED: high affinity cationic amino acid transporter 1-like [Acyrthosiphon pisum]	XP_001944828	1.0028e-57	99	201.445	103
contig_57309_10.23	10.23	Protein & Amino Acid Metabolism	3-oxoacyl-		acyl-carrier-protein synthase, mitochondrial	340	gi|642936649|ref|XP_008198523.1|PREDICTED: 3-oxoacyl-[acyl-carrier-protein] synthase, mitochondrial [Tribolium castaneum] >gi|1008452442|ref|XP_015839091.1| PREDICTED: 3-oxoacyl-[acyl-carrier-protein] synthase, mitochondrial [Tribolium castaneum] >gi|270013058|gb|EFA09506.1| 3-oxoacyl-[acyl-carrier-protein] synthase, mitochondrial-like Protein [Tribolium castaneum]	XP_008198523	3.61316e-12	77	72.0182	53
contig_58089_14.88	14.88	Defense/Immune Response	interleukin-8		Homo sapiens	1134	gi|10834978|ref|NP_000575.1|interleukin-8 precursor [Homo sapiens] >gi|114594300|ref|XP_001156432.1| PREDICTED: interleukin-8 [Pan troglodytes] >gi|397524824|ref|XP_003832383.1| PREDICTED: interleukin-8 [Pan paniscus] >gi|426344618|ref|XP_004038858.1| PREDICTED: interleukin-8 [Gorilla gorilla gorilla] >gi|124359|sp|P10145.1|IL8_HUMAN RecName: Full=Interleukin-8; Short=IL-8; AltName: Full=C-X-C mo…	NP_000575	2.30992e-46	100	165.622	96
contig_58509_24.64	24.64	Proteolysis	serine protease easter		Cyphomyrmex costatus	556	gi|1009368727|gb|KYM93572.1|Serine protease easter [Cyphomyrmex costatus]	KYM93572	5.48022e-24	58	106.686	137
contig_5854_44.71	44.71	Fatty Acid & Lipid Metabolism	lipophorin receptor		Tribolium castaneum	4118	gi|1008455239|ref|XP_015839884.1|PREDICTED: very low-density lipoprotein receptor isoform X2 [Tribolium castaneum]	XP_015839884	0	79	1202.19	898
contig_59961_19.46	19.46	Proteolysis	carboxypeptidase q-like		Lasius niger	451	gi|861628625|gb|KMQ89450.1|plasma glutamate carboxypeptidase-like protein [Lasius niger]	KMQ89450	1.57543e-30	72	124.02	110
contig_60223_8.29	8.29	Signal Tranduction	vascular endothelial growth factor receptor kdr-like		Cyprinus carpio	402	gi|966703667|gb|KTG35908.1|hypothetical protein cypCar_00008248 [Cyprinus carpio]	KTG35908	1.6269e-22	64	89.7373	77
contig_61272_13.34	13.34	Proteolysis	trypsin- partial		Cephus cinctus	498	gi|1000725991|ref|XP_015585584.1|PREDICTED: trypsin-1-like [Cephus cinctus]	XP_015585584	2.79598e-12	59	72.0182	105
contig_613_1.092.23	1092.23	Defense/Immune Response	beta- -glucan-binding		Tribolium castaneum	1749	gi|91080023|ref|XP_972063.1|PREDICTED: beta-1,3-glucan-binding protein isoform X1 [Tribolium castaneum] >gi|270004908|gb|EFA01356.1| Gram-negative bacteria binding protein 3 [Tribolium castaneum]	XP_972063	5.05078e-173	70	512.686	465
contig_62035_42.05	42.05	Translation	ubiquitin-60s ribosomal protein l40		Rhizopus delemar RA 99-880	399	gi|384489624|gb|EIE80846.1|ubiquitin-60S ribosomal protein L40 [Rhizopus delemar RA 99-880] >gi|384499458|gb|EIE89949.1| ubiquitin-60S ribosomal protein L40 [Rhizopus delemar RA 99-880] >gi|384500325|gb|EIE90816.1| ubiquitin-60S ribosomal protein L40 [Rhizopus delemar RA 99-880] >gi|384501425|gb|EIE91916.1| ubiquitin-60S ribosomal protein L40 [Rhizopus delemar RA 99-880]	EIE80846	1.4467e-86	99	260.766	128
contig_62577_16.26	16.26	Sensory Response	odorant-binding protein partial		Aphis glycines	1201	gi|586829533|gb|AHJ80888.1|odorant binding protein 2 [Aphis glycines]	AHJ80888	6.33145e-91	100	251.521	155
contig_62611_9.03	9.03	Defense/Immune Response	myrosinase 1		Tribolium castaneum	571	gi|91086755|ref|XP_972182.1|PREDICTED: myrosinase 1-like [Tribolium castaneum] >gi|1004397785|gb|KYB26299.1| Myrosinase 1-like Protein [Tribolium castaneum]	XP_972182	4.4987e-36	74	142.124	111
contig_62619_27.15	27.15	Transport	niemann-pick type c-2a		Aedes aegypti	527	gi|157114477|ref|XP_001652290.1|AAEL006854-PA [Aedes aegypti] >gi|108877280|gb|EAT41505.1| AAEL006854-PA [Aedes aegypti]	XP_001652290	4.99163e-34	64	129.413	124
contig_62658_35.11	35.11	Nucleotide Metabolism	nucleoside diphosphate kinase		Graphocephala atropunctata	667	gi|90819960|gb|ABD98737.1|putative nucleoside diphosphate kinase [Graphocephala atropunctata]	ABD98737	1.17421e-115	98	340.117	170
contig_62709_11.80	11.8	Transport	facilitated trehalose transporter tret1-like isoform x1		Acyrthosiphon pisum	401	gi|641678063|ref|XP_008188015.1|PREDICTED: facilitated trehalose transporter Tret1-like isoform X3 [Acyrthosiphon pisum]	XP_008188015	3.01026e-80	100	256.914	122
contig_62827_8.80	8.8	Proteolysis	cathepsin l		Diaprepes abbreviatus	509	gi|152926446|gb|ABS32280.1|cathepsin L protease inhibitor 2 [Diaprepes abbreviatus]	ABS32280	1.20075e-16	73	81.6481	63
contig_6409_280.77	280.77	Defense/Immune Response	thioredoxin domain-containing protein		Oryctes borbonicus	998	gi|952540894|gb|KRT85930.1|Thioredoxin, partial [Oryctes borbonicus]	KRT85930	1.90497e-131	84	388.267	256
contig_6419_95.64	95.64	Proteolysis	lysosomal pro-x carboxypeptidase		Tribolium castaneum	1848	gi|91088397|ref|XP_972807.1|PREDICTED: lysosomal Pro-X carboxypeptidase [Tribolium castaneum] >gi|642931664|ref|XP_008196678.1| PREDICTED: lysosomal Pro-X carboxypeptidase [Tribolium castaneum] >gi|642931666|ref|XP_008196679.1| PREDICTED: lysosomal Pro-X carboxypeptidase [Tribolium castaneum] >gi|270012192|gb|EFA08640.1| Lysosomal Pro-X carboxypeptidase-like Protein [Tribolium castaneum]	XP_972807	0	72	533.487	486
contig_6556_308.59	308.59	UNKN	transmembrane 9 superfamily member 3		Tribolium castaneum	2200	gi|91094015|ref|XP_967117.1|PREDICTED: transmembrane 9 superfamily member 3 [Tribolium castaneum] >gi|1004402292|gb|EEZ99577.2| Transmembrane 9 superfamily member 3-like Protein [Tribolium castaneum]	XP_967117	0	93	1011.91	576
contig_65616_16.14	16.14	UNKN	transmembrane emp24 domain-containing protein bai		Diuraphis noxia	984	gi|985400085|ref|XP_015367695.1|PREDICTED: transmembrane emp24 domain-containing protein bai [Diuraphis noxia]	XP_015367695	2.5246e-141	98	410.994	201
contig_65624_9.08	9.08	Cell Cycle & Processes	s-phase kinase-associated protein 1		Cephus cinctus	395	gi|1000764645|ref|XP_015605411.1|PREDICTED: S-phase kinase-associated protein 1 isoform X1 [Cephus cinctus]	XP_015605411	3.93859e-30	98	117.857	74
contig_66439_17.10	17.1	DNA Replication & Repair	werner syndrome-like exonuclease		Dendroctonus ponderosae	397	gi|478251319|gb|ENN71787.1|hypothetical protein YQE_11521, partial [Dendroctonus ponderosae]	ENN71787	6.48501e-25	84	104.76	69
contig_666_300.32	300.32	Defense/Immune Response	protein disulfide-isomerase tmx3		Oryctes borbonicus	2219	gi|952512482|gb|KRT79210.1|Thioredoxin [Oryctes borbonicus]	KRT79210	0	81	592.423	406
contig_66886_13.97	13.97	Transport	mitochondrial import inner membrane translocase subunit tim14		Diuraphis noxia	493	gi|985394052|ref|XP_015364407.1|PREDICTED: mitochondrial import inner membrane translocase subunit TIM14 [Diuraphis noxia]	XP_015364407	5.10897e-54	100	178.718	90
contig_66962_7.79	7.79	Protein & Amino Acid Metabolism	protein tyrosine non-receptor type nt6		Acyrthosiphon pisum	385	gi|641658639|ref|XP_008180781.1|PREDICTED: tyrosine-protein phosphatase non-receptor type 21 [Acyrthosiphon pisum]	XP_008180781	3.13488e-56	99	199.519	109
contig_6698_24.05	24.05	Signal Tranduction	elmo domain-containing protein 2	ELMO (Engulfment and Cell Motility) is a family of related proteins (~82 kDa) involved in intracellular signalling networks	Tribolium castaneum	2178	gi|91091580|ref|XP_968111.1|PREDICTED: ELMO domain-containing protein 2 [Tribolium castaneum] >gi|270000910|gb|EEZ97357.1| ELMO domain-containing protein 1-like Protein [Tribolium castaneum]	XP_968111	1.93806e-149	81	450.669	311
contig_67067_5.64	5.64	Transport	atp-binding cassette sub-family g member 1-like		Halyomorpha halys	405	gi|939651251|ref|XP_014274727.1|PREDICTED: ATP-binding cassette sub-family G member 4-like [Halyomorpha halys]	XP_014274727	8.54291e-38	74	145.591	133
contig_673_62.55	62.55	Protein & Amino Acid Metabolism	tyrosine-protein phosphatase 10d isoform x2		Tribolium castaneum	5113	gi|642919049|ref|XP_008191713.1|PREDICTED: tyrosine-protein phosphatase 10D isoform X2 [Tribolium castaneum]	XP_008191713	0	88	2446.39	1521
contig_67557_15.26	15.26	Defense/Immune Response	protein disulfide-isomerase a3		Coptotermes formosanus	505	gi|506969315|gb|AGM33001.1|thioredoxin-like domain containing protein, partial [Coptotermes formosanus]	AGM33001	7.10905e-66	83	214.542	143
contig_6773_55.47	55.47	Exocuticle-related	chitinase-3-like protein 2	Chitinase	Operophtera brumata	883	gi|914559453|gb|KOB67109.1|Cht11 [Operophtera brumata]	KOB67109	2.36739e-31	63	132.109	158
contig_6774_40.42	40.42	Exocuticle-related	chitinase-3-like protein 2	Chitinase	Operophtera brumata	729	gi|914559453|gb|KOB67109.1|Cht11 [Operophtera brumata]	KOB67109	4.06284e-55	68	195.282	212
contig_67968_23.17	23.17	Translation	translocon-associated protein subunit beta		Acyrthosiphon pisum	1017	gi|641665889|ref|XP_008183536.1|PREDICTED: translocon-associated protein subunit beta [Acyrthosiphon pisum]	XP_008183536	7.16735e-132	97	387.111	198
contig_681_1.458.82	1458.82	UNKN	calumenin	involved in such ER functions as protein folding and sorting	Tribolium castaneum	2946	gi|91081545|ref|XP_974976.1|PREDICTED: calumenin [Tribolium castaneum] >gi|270006175|gb|EFA02623.1| Calumenin-like Protein [Tribolium castaneum]	XP_974976	2.78995e-164	92	497.278	302
contig_69994_36.16	36.16	Protein & Amino Acid Metabolism	protein-l-isoaspartate(d-aspartate) o-methyltransferase-like isoform x1		Tribolium castaneum	367	gi|642920758|ref|XP_971086.2|PREDICTED: protein-L-isoaspartate(D-aspartate) O-methyltransferase [Tribolium castaneum]	XP_971086	1.31281e-35	95	134.035	71
contig_70077_9.22	9.22	RNA Processing	cyclin-l1 isoform x2		Diuraphis noxia	1184	gi|985410595|ref|XP_015370752.1|PREDICTED: cyclin-L1-like isoform X3 [Diuraphis noxia]	XP_015370752	6.47498e-161	99	469.929	307
contig_70271_9.05	9.05	Fatty Acid & Lipid Metabolism	neutral ceramidase		Fundulus heteroclitus	300	gi|831569950|ref|XP_012734549.1|PREDICTED: neutral ceramidase [Fundulus heteroclitus]	XP_012734549	1.1408e-08	60	62.3882	76
contig_70581_12.91	12.91	Proteolysis	cathepsin l		Artemia franciscana	805	gi|55740402|gb|AAV63977.1|cathepsin L precursor [Artemia franciscana]	AAV63977	2.32681e-94	78	293.893	218
contig_70619_8.74	8.74	Proteolysis	pancreatic secretory trypsin inhibitor-like		Bombyx mori	458	gi|512909564|ref|XP_004926952.1|PREDICTED: leech-derived tryptase inhibitor C [Bombyx mori]	XP_004926952	2.60472e-07	59	55.0694	77
contig_7069_50.37	50.37	Carbohydrate Metabolism	partial		Stemphylium lycopersici	479	gi|909990404|gb|KNG47900.1|glycoside hydrolase family 45 protein [Stemphylium lycopersici]	KNG47900	4.96099e-47	88	164.466	95
contig_70871_8.13	8.13	Defense/Immune Response	legumain isoform x3		Zootermopsis nevadensis	711	gi|646718496|gb|KDR20936.1|Legumain [Zootermopsis nevadensis]	KDR20936	2.50042e-83	79	268.855	193
contig_70958_10.53	10.53	Exocuticle-related	maltase a1-like		Diuraphis noxia	566	gi|985420469|ref|XP_015375687.1|PREDICTED: maltase A1-like [Diuraphis noxia]	XP_015375687	9.0902e-75	91	245.743	135
contig_714_1.577.24	1577.24	Proteolysis	lysosomal aspartic protease-like		Tribolium castaneum	1528	gi|91087085|ref|XP_974959.1|PREDICTED: aspartic proteinase A2 [Tribolium castaneum] >gi|1004398015|gb|KYB26436.1| Lysosomal aspartic protease-like Protein [Tribolium castaneum]	XP_974959	3.7456e-124	69	382.104	343
contig_72057_35.77	35.77	Fatty Acid & Lipid Metabolism	apolipoprotein d-like		Acyrthosiphon pisum	381	gi|641660819|ref|XP_008181632.1|PREDICTED: apolipoprotein D-like isoform X1 [Acyrthosiphon pisum]	XP_008181632	9.54108e-50	90	172.17	91
contig_72729_9.99	9.99	Heat Shock/Stess Response	peptidyl-prolyl cis-trans isomerase b		Cephus cinctus	461	gi|1000747569|ref|XP_015596570.1|PREDICTED: peptidyl-prolyl cis-trans isomerase 5 isoform X1 [Cephus cinctus]	XP_015596570	3.41755e-48	79	166.777	136
contig_73225_7.64	7.64	UNKN	heavy subunit		Diuraphis noxia	531	gi|985389040|ref|XP_015379107.1|PREDICTED: putative ferritin heavy polypeptide-like 19 [Diuraphis noxia]	XP_015379107	6.88555e-89	96	271.937	134
contig_735_76.70	76.7	RNA Processing	poly -specific ribonuclease parn-like isoform x1		Tribolium castaneum	2418	gi|189240485|ref|XP_967921.2|PREDICTED: poly(A)-specific ribonuclease PARN [Tribolium castaneum] >gi|270011407|gb|EFA07855.1| Poly(A)-specific ribonuclease PARN-like Protein [Tribolium castaneum]	XP_967921	0	69	560.836	592
contig_73904_12.63	12.63	Na/K-ATPase	bumetanide-sensitive sodium- -chloride cotransporter		Tribolium castaneum	987	gi|1004402811|gb|KYB29205.1|Bumetanide-sensitive sodium-(potassium)-chloride cotransporter-like Protein [Tribolium castaneum]	KYB29205	1.07928e-153	92	487.263	290
contig_7395_54.72	54.72	Defense/Immune Response	tolloid-like protein 2		Tribolium castaneum	3888	gi|91091526|ref|XP_970162.1|PREDICTED: tolloid-like protein 1 [Tribolium castaneum] >gi|1004401663|gb|KYB28517.1| Dorsal-ventral patterning protein tolloid -like protein [Tribolium castaneum]	XP_970162	0	80	1514.59	1112
contig_7508_13.61	13.61	Defense/Immune Response	insulin-like growth factor-binding protein complex acid labile subunit		Riptortus pedestris	1630	gi|501297230|dbj|BAN21113.1|leucine-rich transmembrane protein [Riptortus pedestris]	BAN21113	9.26213e-91	59	305.449	499
contig_75483_10.28	10.28	DNA Replication & Repair	hypothetical protein RO3G_17192		Rhizopus delemar RA 99-880	631	gi|384501830|gb|EIE92321.1|hypothetical protein RO3G_17192 [Rhizopus delemar RA 99-880]	EIE92321	2.65768e-69	83	225.713	145
contig_75648_14.64	14.64	UNKN	plasma alpha-l-fucosidase		Tribolium castaneum	605	gi|642916091|ref|XP_008190884.1|PREDICTED: alpha-L-fucosidase-like isoform X1 [Tribolium castaneum]	XP_008190884	4.75713e-82	77	263.848	195
contig_75867_9.58	9.58	Proteolysis	myeloblastin		Tribolium castaneum	338	gi|91079312|ref|XP_967496.1|PREDICTED: brachyurin [Tribolium castaneum]	XP_967496	1.6732e-12	77	71.2478	62
contig_76182_5.37	5.37	Proteolysis	carboxypeptidase a-like		Strongylocentrotus purpuratus	366	gi|115938098|ref|XP_794139.2|PREDICTED: carboxypeptidase B [Strongylocentrotus purpuratus]	XP_794139	2.61205e-16	62	83.9593	110
contig_76686_7.68	7.68	Signal Tranduction	brefeldin a-inhibited guanine nucleotide-exchange protein 1		Solenopsis invicta	304	gi|322797660|gb|EFZ19669.1|hypothetical protein SINV_05038, partial [Solenopsis invicta]	EFZ19669	3.12731e-53	93	180.644	100
contig_77403_11.42	11.42	Exocuticle-related	insect cuticle partial		Dendroctonus ponderosae	537	gi|546681760|gb|ERL91786.1|hypothetical protein D910_09111, partial [Dendroctonus ponderosae]	ERL91786	5.48873e-69	83	233.032	160
contig_7815_186.90	186.9	Proteolysis	gpi-anchor transamidase		Tribolium castaneum	912	gi|91086227|ref|XP_972385.1|PREDICTED: putative GPI-anchor transamidase [Tribolium castaneum] >gi|1004398394|gb|KYB26647.1| Putative GPI-anchor transamidase-like Protein [Tribolium castaneum]	XP_972385	5.10225e-151	92	439.884	234
contig_7873_51.36	51.36	Proteolysis	cathepsin b		Tribolium castaneum	1480	gi|91078958|ref|XP_974220.1|PREDICTED: cathepsin B [Tribolium castaneum] >gi|642916227|ref|XP_008190938.1| PREDICTED: cathepsin B [Tribolium castaneum] >gi|270004841|gb|EFA01289.1| cathepsin B precursor [Tribolium castaneum]	XP_974220	6.64884e-167	80	487.649	327
contig_78774_8.41	8.41	Exocuticle-related	cuticle protein 7		Tribolium castaneum	674	gi|270007264|gb|EFA03712.1|Pupal cuticle protein Edg-84A-like Protein [Tribolium castaneum]	EFA03712	4.79605e-21	74	96.6709	74
contig_78954_8.04	8.04	Proteolysis	cathepsin l		Hordeum vulgare subsp. vulgare	317	gi|326501772|dbj|BAK02675.1|predicted protein [Hordeum vulgare subsp. vulgare]	BAK02675	3.78816e-57	92	191.43	102
contig_7916_28.65	28.65	Proteolysis	e3 ubiquitin-protein ligase march2		Tribolium castaneum	1287	gi|642927741|ref|XP_008195387.1|PREDICTED: uncharacterized protein LOC657278 [Tribolium castaneum] >gi|642927743|ref|XP_008195388.1| PREDICTED: uncharacterized protein LOC657278 [Tribolium castaneum] >gi|270009888|gb|EFA06336.1| hypothetical protein TcasGA2_TC009208 [Tribolium castaneum]	XP_008195387	7.60243e-168	86	495.352	351
contig_80239_7.61	7.61	Carbohydrate Metabolism	glucosyl glucuronosyl transferase		Tribolium castaneum	378	gi|1008451560|ref|XP_015838843.1|PREDICTED: UDP-glucuronosyltransferase 2A3 isoform X1 [Tribolium castaneum]	XP_015838843	3.85277e-21	71	98.2117	94
contig_80281_7.47	7.47	Fatty Acid & Lipid Metabolism	phosphoethanolamine transferase class o	used to construct sphingomyelins	Erysiphe necator	301	gi|730177471|gb|KHJ32160.1|putative gpi ethanolamine phosphate transferase [Erysiphe necator]	KHJ32160	1.6862e-32	88	131.339	90
contig_81072_10.54	10.54	Transport	proton-coupled amino acid transporter 4		Tribolium castaneum	961	gi|91081197|ref|XP_975607.1|PREDICTED: proton-coupled amino acid transporter 4 [Tribolium castaneum] >gi|270005269|gb|EFA01717.1| Proton-coupled amino acid transporter 4-like Protein [Tribolium castaneum]	XP_975607	1.31598e-70	68	150.214	144
contig_82032_10.73	10.73	Fatty Acid & Lipid Metabolism	protein disulfide-isomerase a6		Bombus impatiens	513	gi|350408527|ref|XP_003488434.1|PREDICTED: protein disulfide-isomerase A6 [Bombus impatiens]	XP_003488434	1.24929e-21	81	80.4925	69
contig_82423_21.56	21.56	Signal Tranduction	bone morphogenetic protein receptor type-2		Tribolium castaneum	1096	gi|91085823|ref|XP_974821.1|PREDICTED: bone morphogenetic protein receptor type-2 [Tribolium castaneum] >gi|270011027|gb|EFA07475.1| wishful thinking [Tribolium castaneum]	XP_974821	5.12507e-54	64	201.445	233
contig_83471_25.11	25.11	Proteolysis	serine protease easter		Polistes dominula	414	gi|972179686|ref|XP_015171119.1|PREDICTED: serine protease easter-like [Polistes dominula]	XP_015171119	9.42636e-21	62	96.2857	106
contig_835_113.14	113.14	Nucleotide Metabolism	guanylate cyclase 32e-like isoform x1		Tribolium castaneum	6646	gi|642936568|ref|XP_008198489.1|PREDICTED: guanylate cyclase 32E [Tribolium castaneum] >gi|1004396310|gb|EFA10586.2| Guanylate cyclase 32E-like Protein [Tribolium castaneum]	XP_008198489	0	81	1931.76	1366
contig_8368_259.53	259.53	UNKN	transmembrane emp24 domain-containing protein 7-like		Trichogramma pretiosum	440	gi|936713848|ref|XP_014234883.1|PREDICTED: transmembrane emp24 domain-containing protein 3-like [Trichogramma pretiosum]	XP_014234883	2.1063e-25	75	107.071	82
contig_83776_10.42	10.42	Defense/Immune Response	ubiquitin family		Aphanomyces astaci	316	gi|698787170|ref|XP_009826617.1|polyubiquitin [Aphanomyces astaci] >gi|813150409|ref|XP_012200851.1| hypothetical protein SPRG_06647 [Saprolegnia parasitica CBS 223.65] >gi|574117706|gb|ETV83187.1| polyubiquitin [Aphanomyces astaci] >gi|641534463|gb|KDO28410.1| hypothetical protein SPRG_06647 [Saprolegnia parasitica CBS 223.65]	XP_009826617	2.42981e-62	98	198.749	104
contig_84512_9.06	9.06	Fatty Acid & Lipid Metabolism	phosphatidylserine synthase 1	Phosphatidylserine is an important phospholipid membrane component which plays a key role in cell cycle signaling, specifically in relationship to apoptosis	Diuraphis noxia	396	gi|985419182|ref|XP_015375088.1|PREDICTED: phosphatidylserine synthase 1 [Diuraphis noxia]	XP_015375088	4.65934e-76	100	244.202	132
contig_84924_18.59	18.59	Proteolysis	cathepsin b-n		Sitobion avenae	1168	gi|300835056|gb|ADK37857.1|putative cathepsin precursor [Sitobion avenae]	ADK37857	0	93	560.836	339
contig_86195_6.05	6.05	Proteolysis	matrix metalloproteinase-14 isoform x1		Acyrthosiphon pisum	637	gi|328724691|ref|XP_001949484.2|PREDICTED: matrix metalloproteinase-16 isoform X3 [Acyrthosiphon pisum] >gi|641679317|ref|XP_008188506.1| PREDICTED: matrix metalloproteinase-16 isoform X3 [Acyrthosiphon pisum]	XP_001949484	2.78232e-79	95	259.225	132
contig_8671_67.11	67.11	OX-REDOX	laccase 1 isoform x1		Tribolium castaneum	2226	gi|86515378|ref|NP_001034514.1|laccase 1 [Tribolium castaneum] >gi|642912767|ref|XP_008201239.1| PREDICTED: laccase 1 isoform X1 [Tribolium castaneum] >gi|642912769|ref|XP_008201241.1| PREDICTED: laccase 1 isoform X1 [Tribolium castaneum] >gi|1008427979|ref|XP_015839414.1| PREDICTED: laccase 1 isoform X1 [Tribolium castaneum] >gi|1008427982|ref|XP_015839422.1| PREDICTED: laccase 1 isoform X1 [Tri…	NP_001034514	0	74	817.765	650
contig_8813_22.95	22.95	Protein & Amino Acid Metabolism	tyrosine-protein kinase dnt-like		Leptinotarsa decemlineata	1280	gi|971830653|gb|ALV82498.1|Drl [Leptinotarsa decemlineata]	ALV82498	0	82	531.176	424
contig_88334_8.69	8.69	Proteolysis	zinc carboxypeptidase-like		Chrysomela tremula	431	gi|227018358|gb|ACP18845.1|carboxypeptidase [Chrysomela tremula]	ACP18845	7.16526e-17	57	83.5741	113
contig_88767_7.11	7.11	Proteolysis	cd109 antigen		Tribolium castaneum	325	gi|1008440955|ref|XP_015835945.1|PREDICTED: CD109 antigen [Tribolium castaneum] >gi|270008246|gb|EFA04694.1| CD109 antigen-like Protein [Tribolium castaneum]	XP_015835945	2.66319e-06	78	55.8398	46
contig_8926_61.56	61.56	UNKN	transmembrane emp24 domain-containing protein 5		Tribolium castaneum	538	gi|91077438|ref|XP_966878.1|PREDICTED: transmembrane emp24 domain-containing protein 5 [Tribolium castaneum] >gi|270002130|gb|EEZ98577.1| Transmembrane emp24 domain-containing protein 5-like Protein [Tribolium castaneum]	XP_966878	4.72257e-49	85	170.629	111
contig_8951_80.69	80.69	Cell Cycle & Processes	lachesin		Tribolium castaneum	1497	gi|189238127|ref|XP_001814833.1|PREDICTED: lachesin [Tribolium castaneum] >gi|270008732|gb|EFA05180.1| Lachesin-like Protein [Tribolium castaneum]	XP_001814833	0	89	595.119	352
contig_90228_6.29	6.29	Carbohydrate Metabolism	beta-galactosidase-like		Diuraphis noxia	452	gi|985394689|ref|XP_015364755.1|PREDICTED: beta-galactosidase-like [Diuraphis noxia]	XP_015364755	4.82135e-40	96	152.525	80
contig_91096_11.13	11.13	Defense/Immune Response	programmed cell death protein 6 isoform x2		Zootermopsis nevadensis	300	gi|646723721|gb|KDR24234.1|Programmed cell death protein 6 [Zootermopsis nevadensis]	KDR24234	3.61827e-42	96	147.902	76
contig_9162_27.15	27.15	OX-REDOX	golgin subfamily a member 6-like protein 22		Acyrthosiphon pisum	1505	gi|193664402|ref|XP_001947745.1|PREDICTED: uncharacterized protein LOC100167781 [Acyrthosiphon pisum]	XP_001947745	0	98	530.02	413
contig_92302_14.49	14.49	Exocuticle-related	chitooligosaccharidolytic beta-n-acetylglucosaminidase	degrades chitin	Mamestra brassicae	415	gi|893713840|gb|AKR06190.1|beta-N-acetylglucosaminidase [Mamestra brassicae]	AKR06190	2.4282e-11	66	71.2478	59
contig_9254_59.92	59.92	UNKN	transmembrane protein 87a		Tribolium castaneum	2057	gi|642919365|ref|XP_008191841.1|PREDICTED: transmembrane protein 87A [Tribolium castaneum] >gi|642919367|ref|XP_008191842.1| PREDICTED: transmembrane protein 87A [Tribolium castaneum] >gi|270005808|gb|EFA02256.1| Transmembrane protein 87A-like Protein [Tribolium castaneum]	XP_008191841	0	82	707.983	496
contig_929_137.59	137.59	Transport	nicotinic acetylcholine receptor subunit alpha10		Tribolium castaneum	1641	gi|157954021|ref|NP_001103247.1|nicotinic acetylcholine receptor alpha 10 subunit precursor [Tribolium castaneum] >gi|154810991|gb|ABS86914.1| nicotinic acetylcholine receptor subunit alpha10 [Tribolium castaneum] >gi|270006358|gb|EFA02806.1| nicotinic acetylcholine receptor subunit alpha10 [Tribolium castaneum]	NP_001103247	0	81	570.466	418
contig_92914_5.03	5.03	Heat Shock/Stess Response	protein disulfide-isomerase		Diuraphis noxia	627	gi|985416314|ref|XP_015373608.1|PREDICTED: protein disulfide-isomerase, partial [Diuraphis noxia]	XP_015373608	4.11118e-87	98	276.944	139
contig_9292_22.05	22.05	OX-REDOX	ferritin subunit		Acyrthosiphon pisum	1815	gi|240848575|ref|NP_001155797.1|ferritin-like precursor [Acyrthosiphon pisum] >gi|239788704|dbj|BAH71020.1| ACYPI009403 [Acyrthosiphon pisum]	NP_001155797	6.23827e-148	97	439.113	219
contig_92962_13.30	13.3	Signal Tranduction	syndecan isoform x1	Syndecans are single transmembrane domain proteins that are thought to act as coreceptors, especially for G protein-coupled receptors	Diuraphis noxia	1056	gi|985405164|ref|XP_015369637.1|PREDICTED: syndecan [Diuraphis noxia]	XP_015369637	2.73459e-127	94	379.793	290
contig_93009_9.00	9	UNKN	serine threonine-protein kinase mitochondrial		Acyrthosiphon pisum	309	gi|641664128|ref|XP_008182900.1|PREDICTED: serine/threonine-protein kinase PINK1, mitochondrial [Acyrthosiphon pisum] >gi|641664130|ref|XP_008182901.1| PREDICTED: serine/threonine-protein kinase PINK1, mitochondrial [Acyrthosiphon pisum]	XP_008182900	8.13243e-53	95	185.267	91
contig_93848_5.09	5.09	Transport	protein transport protein sec24c		Acyrthosiphon pisum	384	gi|641665459|ref|XP_008183388.1|PREDICTED: protein transport protein Sec24D isoform X2 [Acyrthosiphon pisum]	XP_008183388	1.47329e-71	99	244.588	116
contig_9444_52.93	52.93	Proteolysis	serine protease snake		Oryctes borbonicus	1333	gi|952520437|gb|KRT80826.1|Trypsin, partial [Oryctes borbonicus]	KRT80826	3.79247e-66	63	229.18	246
contig_94868_14.28	14.28	Transport	solute carrier family 35 member b1		Acyrthosiphon pisum	433	gi|193664424|ref|XP_001950126.1|PREDICTED: solute carrier family 35 member B1 [Acyrthosiphon pisum]	XP_001950126	1.44436e-50	96	175.637	129
contig_95323_10.97	10.97	Defense/Immune Response	autophagy related lipase protein		Sclerotinia sclerotiorum 1980	302	gi|156058298|ref|XP_001595072.1|hypothetical protein SS1G_03160 [Sclerotinia sclerotiorum 1980] >gi|154700948|gb|EDO00687.1| hypothetical protein SS1G_03160 [Sclerotinia sclerotiorum 1980 UF-70]	XP_001595072	3.95834e-45	100	164.081	78
contig_95496_6.57	6.57	Cell Cycle & Processes	calsyntenin-1	type I transmembrane proteins that belong to the cadherin superfamily.	Acyrthosiphon pisum	523	gi|193697438|ref|XP_001943127.1|PREDICTED: calsyntenin-1 [Acyrthosiphon pisum]	XP_001943127	2.02655e-94	97	306.605	170
contig_95722_18.31	18.31	Exocuticle-related	probable chitinase 2	Chitinase	Melipona quadrifasciata	332	gi|925680265|gb|KOX77106.1|Chitotriosidase-1 [Melipona quadrifasciata]	KOX77106	3.00381e-06	71	55.0694	38
contig_95926_10.91	10.91	Na/K-ATPase	bumetanide-sensitive sodium- -chloride cotransporter isoform x1		Drosophila melanogaster	411	gi|442631934|ref|NP_001261758.1|sodium chloride cotransporter 69, isoform E [Drosophila melanogaster] >gi|440215689|gb|AGB94451.1| sodium chloride cotransporter 69, isoform E [Drosophila melanogaster]	NP_001261758	3.04469e-59	88	209.149	138
contig_9604_76.19	76.19	Proteolysis	lysosomal aspartic protease		Tigriopus japonicus	1724	gi|868477657|gb|AKO90276.1|cathepsin D [Tigriopus japonicus]	AKO90276	5.4606e-127	70	390.963	387
contig_96257_15.19	15.19	Other	epidermal growth factor receptor isoform x2		Tribolium castaneum	768	gi|642918480|ref|XP_008191494.1|PREDICTED: epidermal growth factor receptor isoform X2 [Tribolium castaneum]	XP_008191494	7.91127e-78	88	267.7	156
contig_97205_9.39	9.39	Carbohydrate Metabolism	maltase 2-like		Acyrthosiphon pisum	712	gi|187097094|ref|NP_001119607.1|sucrase precursor [Acyrthosiphon pisum] >gi|81159208|gb|ABB55878.1| sucrase [Acyrthosiphon pisum]	NP_001119607	4.19575e-139	96	415.616	220
contig_97353_8.30	8.3	Na/K-ATPase	potassium sodium hyperpolarization-activated cyclic nucleotide-gated channel 2 isoform x2		Diuraphis noxia	663	gi|985410995|ref|XP_015370951.1|PREDICTED: potassium/sodium hyperpolarization-activated cyclic nucleotide-gated channel 1-like isoform X2 [Diuraphis noxia]	XP_015370951	5.81676e-149	99	439.499	208
contig_98408_5.50	5.5	RNA Processing	rna-binding protein 8a		Nasonia vitripennis	301	gi|156553815|ref|XP_001604863.1|PREDICTED: RNA-binding protein 8A [Nasonia vitripennis]	XP_001604863	1.09443e-45	96	156.377	85
contig_98492_17.76	17.76	Exocuticle-related	chitinase partial	Chitinase	Daphnia pulex	711	gi|321479456|gb|EFX90412.1|hypothetical protein DAPPUDRAFT_189897 [Daphnia pulex]	EFX90412	9.79093e-76	79	251.521	166
contig_9902_249.51	249.51	Heat Shock/Stess Response	fk506-binding protein 2 isoform x2		Musca domestica	1056	gi|557750019|ref|XP_005174774.1|PREDICTED: FK506-binding protein 2 [Musca domestica]	XP_005174774	1.64179e-49	57	177.178	208
contig_99119_5.73	5.73	Heat Shock/Stess Response	heat shock 70 kda protein cognate 3		Wasmannia auropunctata	378	gi|780722018|ref|XP_011707184.1|PREDICTED: heat shock 70 kDa protein cognate 3-like, partial [Wasmannia auropunctata]	XP_011707184	2.72239e-50	91	169.859	98
contig_99375_13.18	13.18	Carbohydrate Metabolism	alpha- fungi		Sclerotinia sclerotiorum 1980	412	gi|156058746|ref|XP_001595296.1|hypothetical protein SS1G_03385 [Sclerotinia sclerotiorum 1980] >gi|154701172|gb|EDO00911.1| hypothetical protein SS1G_03385 [Sclerotinia sclerotiorum 1980 UF-70]	XP_001595296	1.82465e-63	100	214.927	117
contig_99722_7.64	7.64	Exocuticle-related	chitinase partial	Chitinase	Daphnia pulex	737	gi|385048516|gb|AFI40019.1|chitinase 16, partial [Daphnia pulex]	AFI40019	1.43076e-77	76	249.21	182
contig_99960_6.09	6.09	UNKN	endoplasmic reticulum resident protein 29		Acyrthosiphon pisum	370	gi|648215755|ref|NP_001280399.1|endoplasmic reticulum resident protein 29 precursor [Acyrthosiphon pisum] >gi|239789964|dbj|BAH71574.1| ACYPI000995 [Acyrthosiphon pisum]	NP_001280399	9.09595e-37	98	137.117	69
contig_100156_11.02	11.02	UNKN	nucleolar and coiled-body phosphoprotein 1-like isoform x3		Apis mellifera	476	gi|571554217|ref|XP_006566059.1|PREDICTED: nucleolar and coiled-body phosphoprotein 1-like isoform X3 [Apis mellifera]	XP_006566059	5.02806e-16	77	85.8853	89
contig_100240_9.04	9.04	Signal Tranduction	semaphorin-1a-like	They primarily act as short-range inhibitory signals and signal through multimeric receptor complexes	Acyrthosiphon pisum	336	gi|328707579|ref|XP_001944597.2|PREDICTED: semaphorin-1A-like [Acyrthosiphon pisum]	XP_001944597	3.29362e-68	98	229.18	111
contig_100325_8.99	8.99	detoxification	udp-glucuronosyltransferase 1-7-like protein		Tribolium castaneum	355	gi|642919302|ref|XP_008191817.1|PREDICTED: UDP-glucuronosyltransferase 1-7 isoform X3 [Tribolium castaneum] >gi|1004400522|gb|EFA02977.2| UDP-glucuronosyltransferase 1-7-like Protein [Tribolium castaneum]	XP_008191817	5.01312e-10	65	66.6254	72
contig_100402_7.79	7.79	Sensory Response	ejaculatory bulb-specific protein 3		Aedes aegypti	375	gi|157125722|ref|XP_001660749.1|AAEL001963-PA [Aedes aegypti] >gi|108882602|gb|EAT46827.1| AAEL001963-PA [Aedes aegypti]	XP_001660749	1.84249e-29	68	114.775	104
contig_100796_6.56	6.56	Fatty Acid & Lipid Metabolism	lipase member h-b-like		Acyrthosiphon pisum	405	gi|328717539|ref|XP_003246235.1|PREDICTED: lipase member H-B-like [Acyrthosiphon pisum]	XP_003246235	5.12125e-47	84	166.392	126
contig_10082_492.34	492.34	Defense/Immune Response	mesencephalic astrocyte-derived neurotrophic factor homolog	Involved in Inflammation by Negatively Regulating the NF-κB Pathway	Tribolium castaneum	951	gi|91085369|ref|XP_971638.1|PREDICTED: mesencephalic astrocyte-derived neurotrophic factor homolog [Tribolium castaneum] >gi|270009134|gb|EFA05582.1| Mesencephalic astrocyte-derived neurotrophic factor homolog-like Protein [Tribolium castaneum]	XP_971638	2.93825e-74	87	238.424	166
contig_101716_11.49	11.49	Development	serine threonine-protein kinase tousled-like 2 isoform x5	A. thaliana encodes a protein kinase homolog that is required for leaf and flower development	Diuraphis noxia	432	gi|985386548|ref|XP_015370334.1|PREDICTED: serine/threonine-protein kinase tousled-like 2 isoform X5 [Diuraphis noxia]	XP_015370334	7.03106e-48	97	175.252	107
contig_10187_112.97	112.97	Proteolysis	antichymotrypsin-2 isoform x2		Tribolium castaneum	1331	gi|1008429047|ref|XP_015840672.1|PREDICTED: antichymotrypsin-2 isoform X7 [Tribolium castaneum]	XP_015840672	1.27128e-91	63	295.434	390
contig_102219_21.14	21.14	Proteolysis	serine protease		Acyrthosiphon pisum	375	gi|328718793|ref|XP_001947565.2|PREDICTED: putative serine protease K12H4.7 [Acyrthosiphon pisum]	XP_001947565	8.52858e-12	52	71.633	89
contig_102382_9.67	9.67	Proteolysis	lysosomal acid phosphatase		Dendroctonus ponderosae	520	gi|478253847|gb|ENN74139.1|hypothetical protein YQE_09112, partial [Dendroctonus ponderosae] >gi|546684653|gb|ERL94270.1| hypothetical protein D910_11551 [Dendroctonus ponderosae]	ENN74139	9.36497e-18	78	88.9669	64
contig_103092_10.68	10.68	UNKN	polyhydroxybutyrate depolymerase		Capitella teleta	408	gi|443705034|gb|ELU01779.1|hypothetical protein CAPTEDRAFT_107773, partial [Capitella teleta]	ELU01779	1.2164e-20	70	95.1301	86
contig_1032_2.870.79	2870.79	UNKN	protein anon-37cs-like protein		Tribolium castaneum	1761	gi|270010262|gb|EFA06710.1|Protein anon-37Cs-like Protein [Tribolium castaneum]	EFA06710	6.15528e-101	59	327.405	448
contig_103243_9.76	9.76	Transport	atp-binding cassette sub-family a member 3		Diuraphis noxia	302	gi|985396001|ref|XP_015365480.1|PREDICTED: ATP-binding cassette sub-family A member 3-like isoform X1 [Diuraphis noxia]	XP_015365480	1.20926e-37	92	146.362	100
contig_10357_65.62	65.62	UNKN	hypothetical protein GYMLUDRAFT_34462		Gymnopus luxurians FD-317 M1	403	gi|751028334|gb|KIK70026.1|hypothetical protein GYMLUDRAFT_34462 [Gymnopus luxurians FD-317 M1]	KIK70026	1.00613e-39	82	140.584	84
contig_104083_5.43	5.43	Other	e3 ufm1-protein ligase 1 homolog		Acyrthosiphon pisum	311	gi|328718306|ref|XP_001942970.2|PREDICTED: E3 UFM1-protein ligase 1 homolog [Acyrthosiphon pisum]	XP_001942970	1.29766e-13	100	76.6406	35
contig_104150_9.35	9.35	UNKN	PREDICTED: uncharacterized protein LOC106141470		Amyelois transitella	322	gi|913333772|ref|XP_013198575.1|PREDICTED: uncharacterized protein LOC106141470 [Amyelois transitella]	XP_013198575	1.35843e-05	67	43.8986	43
contig_104155_8.54	8.54	Fatty Acid & Lipid Metabolism	lipase member i		Sarcoptes scabiei	831	gi|934156988|gb|KPM06762.1|Pancreatic triacylglycerol lipase-like protein [Sarcoptes scabiei]	KPM06762	5.35131e-44	59	164.851	215
contig_104604_9.68	9.68	Proteolysis	peptidase family m28		Rhizopus delemar RA 99-880	516	gi|384490257|gb|EIE81479.1|hypothetical protein RO3G_06184 [Rhizopus delemar RA 99-880]	EIE81479	8.46265e-14	53	78.1814	145
contig_104903_9.77	9.77	UNKN	er membrane protein complex subunit 7		Copidosoma floridanum	381	gi|936580479|ref|XP_014204652.1|PREDICTED: ER membrane protein complex subunit 7 [Copidosoma floridanum]	XP_014204652	1.63237e-14	72	77.411	65
contig_10524_36.43	36.43	Development	synaptotagmin partial		Caenorhabditis brenneri	971	gi|341891935|gb|EGT47870.1|hypothetical protein CAEBREN_31448 [Caenorhabditis brenneri]	EGT47870	1.16712e-08	45	66.2402	235
contig_105321_9.15	9.15	UNKN	PREDICTED: uncharacterized protein LOC100571834		Acyrthosiphon pisum	317	gi|641657667|ref|XP_008180435.1|PREDICTED: uncharacterized protein LOC100571834 [Acyrthosiphon pisum]	XP_008180435	1.68685e-40	90	146.747	84
contig_105594_9.79	9.79	Development	protein scabrous		Acyrthosiphon pisum	459	gi|328699407|ref|XP_001944698.2|PREDICTED: protein scabrous [Acyrthosiphon pisum]	XP_001944698	6.23759e-83	93	268.085	147
contig_105815_5.61	5.61	UNKN	hypothetical protein GLOTRDRAFT_140754		Gloeophyllum trabeum ATCC 11539	397	gi|630360759|ref|XP_007869654.1|hypothetical protein GLOTRDRAFT_140754 [Gloeophyllum trabeum ATCC 11539] >gi|521721342|gb|EPQ51749.1| hypothetical protein GLOTRDRAFT_140754 [Gloeophyllum trabeum ATCC 11539]	XP_007869654	9.58864e-38	71	142.124	132
contig_10627_359.36	359.36	Other	prion-like-(q n-rich) domain-bearing protein 25 isoform x2		Cephus cinctus	1494	gi|1000751994|ref|XP_015598858.1|PREDICTED: prion-like-(Q/N-rich) domain-bearing protein 25 isoform X1 [Cephus cinctus]	XP_015598858	6.45871e-30	49	129.798	302
contig_10649_241.53	241.53	UNKN	PREDICTED: uncharacterized protein LOC107165607		Diuraphis noxia	875	gi|985403224|ref|XP_015369419.1|PREDICTED: uncharacterized protein LOC107165607 [Diuraphis noxia]	XP_015369419	1.19355e-74	83	238.81	161
contig_10672_178.86	178.86	UNKN	PREDICTED: uncharacterized protein LOC100141605		Tribolium castaneum	762	gi|189239542|ref|XP_001816493.1|PREDICTED: uncharacterized protein LOC100141605 [Tribolium castaneum] >gi|1008446677|ref|XP_015837545.1| PREDICTED: uncharacterized protein LOC100141605 [Tribolium castaneum] >gi|1008446679|ref|XP_015837546.1| PREDICTED: uncharacterized protein LOC100141605 [Tribolium castaneum] >gi|1004397886|gb|EFA05969.2| hypothetical protein TcasGA2_TC008790 [Tribolium castaneu…	XP_001816493	5.26452e-54	77	184.111	135
contig_106930_16.25	16.25	Defense/Immune Response	stromal cell-derived factor 2	belong to the chemokine family, members of which activate leukocytes and are often induced by proinflammatory stimuli	Mucor circinelloides f. circinelloides 1006PhL	304	gi|511002731|gb|EPB84157.1|hypothetical protein HMPREF1544_09079 [Mucor circinelloides f. circinelloides 1006PhL]	EPB84157	3.19907e-20	73	91.6633	65
contig_106939_16.35	16.35	Cell Cycle & Processes	reticulon 1 isoform 1	Reticulons are associated with the endoplasmic reticulum, and are involved in neuroendocrine secretion or in membrane trafficking in neuroendocrine cells	Acyrthosiphon pisum	322	gi|326368259|ref|NP_001191909.1|reticulon 1 isoform 1 [Acyrthosiphon pisum]	NP_001191909	4.78587e-05	68	51.2174	60
contig_1070_940.11	940.11	Development	protein yellow		Tribolium castaneum	1050	gi|270011535|gb|EFA07983.1|Protein yellow-like Protein [Tribolium castaneum]	EFA07983	1.25529e-74	71	249.98	212
contig_10719_449.55	449.55	detoxification	venom carboxylesterase-6		Leptinotarsa decemlineata	798	gi|728418583|gb|AIY68374.1|putative pheromone esterase, partial [Leptinotarsa decemlineata]	AIY68374	2.83609e-79	71	260.381	212
contig_10765_44.66	44.66	fatty Acid & Lipid Metabolism	rare lipoprotein a		Acyrthosiphon pisum	1048	gi|328725445|ref|XP_003248481.1|PREDICTED: uncharacterized protein LOC100570509 [Acyrthosiphon pisum] >gi|641680551|ref|XP_008189069.1| PREDICTED: uncharacterized protein LOC100570509 [Acyrthosiphon pisum]	XP_003248481	1.06645e-41	64	155.606	177
contig_10783_8.40	8.4	UNKN	PREDICTED: uncharacterized protein LOC103309066		Acyrthosiphon pisum	663	gi|641661359|ref|XP_008181850.1|PREDICTED: uncharacterized protein LOC103309066 [Acyrthosiphon pisum]	XP_008181850	6.40378e-05	58	50.8322	62
contig_107916_10.21	10.21	UNKN	PREDICTED: uncharacterized protein LOC100158844 isoform X1		Acyrthosiphon pisum	347	gi|328712024|ref|XP_001948029.2|PREDICTED: uncharacterized protein LOC100158844 isoform X1 [Acyrthosiphon pisum]	XP_001948029	4.43633e-58	97	205.682	115
contig_108051_5.08	5.08	Proteolysis	cystinosin homolog isoform x1	protein is located in the membrane of lysosomes, which are compartments in the cell that digest and recycle materials	Acyrthosiphon pisum	588	gi|239790134|dbj|BAH71649.1|ACYPI006713 [Acyrthosiphon pisum]	BAH71649	1.85385e-103	92	310.071	196
contig_108118_7.13	7.13	Sensory Response	odorant binding protein 4		Dendroctonus ponderosae	470	gi|478257270|gb|ENN77433.1|hypothetical protein YQE_06257, partial [Dendroctonus ponderosae] >gi|546683808|gb|ERL93561.1| hypothetical protein D910_10850 [Dendroctonus ponderosae]	ENN77433	4.3778e-08	64	58.9214	57
contig_108341_6.70	6.7	UNKN	cupin	"Cupins" are the most functionally diverse protein superfamily	Lentzea albidocapillata	399	gi|663698777|ref|WP_030475651.1|cupin [Lentzea albidocapillata]	WP_030475651	1.32382e-21	62	94.7449	109
contig_1085_454.22	454.22	Defense/Immune Response	peptidoglycan-recognition protein lc-like isoform x1		Tribolium castaneum	1872	gi|642916772|ref|XP_008192547.1|PREDICTED: peptidoglycan-recognition protein LE [Tribolium castaneum] >gi|270004832|gb|EFA01280.1| Peptidoglycan-recognition protein LE-like Protein [Tribolium castaneum]	XP_008192547	5.07238e-53	70	197.978	167
contig_10860_68.39	68.39	Development	fasciclin-3 isoform x3	suggests that fasciclin III plays a role in growth cone guidance	Tribolium castaneum	3187	gi|1004398833|gb|EFA04881.2|Fasciclin-3-like Protein [Tribolium castaneum]	EFA04881	2.05019e-144	78	452.595	412
contig_10876_28.25	28.25	UNKN	PREDICTED: uncharacterized protein LOC107168880		Diuraphis noxia	1618	gi|985416905|ref|XP_015373911.1|PREDICTED: uncharacterized protein LOC107168880 [Diuraphis noxia]	XP_015373911	1.49713e-135	94	407.527	278
contig_108945_13.28	13.28	UNKN	PREDICTED: uncharacterized protein LOC100570074 isoform X1		Acyrthosiphon pisum	336	gi|641668314|ref|XP_008184414.1|PREDICTED: uncharacterized protein LOC100570074 isoform X1 [Acyrthosiphon pisum]	XP_008184414	7.91565e-20	71	88.9669	88
contig_1092_767.16	767.16	UNKN	PREDICTED: uncharacterized protein LOC100142033		Tribolium castaneum	965	gi|189237379|ref|XP_001814267.1|PREDICTED: uncharacterized protein LOC100142033 [Tribolium castaneum] >gi|270007074|gb|EFA03522.1| hypothetical protein TcasGA2_TC013524 [Tribolium castaneum]	XP_001814267	3.5599e-32	61	130.954	192
contig_10933_73.46	73.46	Heat Shock/Stess Response	dnaj homolog subfamily c member 10-like		Tribolium castaneum	3326	gi|642914570|ref|XP_008190269.1|PREDICTED: dnaJ homolog subfamily C member 10-like [Tribolium castaneum]	XP_008190269	0	73	900.582	771
contig_10952_163.43	163.43	Fatty Acid & Lipid Metabolism	pancreatic triacylglycerol lipase-like		Dendroctonus ponderosae	1169	gi|546685306|gb|ERL94833.1|hypothetical protein D910_12106 [Dendroctonus ponderosae]	ERL94833	6.36383e-53	62	191.045	281
contig_110160_10.50	10.5	Proteolysis	proclotting enzyme-like		Acyrthosiphon pisum	300	gi|193582431|ref|XP_001945529.1|PREDICTED: uncharacterized protein LOC100167515 [Acyrthosiphon pisum]	XP_001945529	1.81249e-43	92	149.828	78
contig_110307_6.44	6.44	Heat Shock/Stess Response	neuroendocrine protein 7b2	It functions as a chaperone protein	Tribolium castaneum	423	gi|91081787|ref|XP_973692.1|PREDICTED: uncharacterized protein LOC662508 [Tribolium castaneum] >gi|1004401127|gb|EFA02732.2| Neuroendocrine protein 7B2-like Protein [Tribolium castaneum]	XP_973692	1.04071e-12	59	72.7886	114
contig_110586_6.81	6.81	Structural	myosin-2 heavy chain-like	responsible for actin-based motility	Diaphorina citri	386	gi|662211031|ref|XP_008479185.1|PREDICTED: myosin-2 heavy chain-like [Diaphorina citri]	XP_008479185	0.000837699	55	47.7506	96
contig_110603_5.27	5.27	Carbohydrate Metabolism	mannose-binding protein c-like		Acyrthosiphon pisum	458	gi|239788606|dbj|BAH70975.1|ACYPI007675 [Acyrthosiphon pisum]	BAH70975	5.11878e-42	88	147.132	85
contig_111112_7.60	7.6	Proteolysis	serine protease easter-like isoform x1		Musca domestica	533	gi|557753887|ref|XP_005176688.1|PREDICTED: serine protease easter-like isoform X1 [Musca domestica]	XP_005176688	8.33118e-05	48	51.9878	98
contig_111181_5.60	5.6	UNKN	umecyanin-like	Probable electron transfer copper protein that serves as a direct electron donor	Nelumbo nucifera	756	gi|720098345|ref|XP_010247602.1|PREDICTED: umecyanin-like [Nelumbo nucifera]	XP_010247602	1.17255e-30	61	123.635	127
contig_111289_7.45	7.45	Proteolysis	probable serine carboxypeptidase cpvl		Lottia gigantea	300	gi|676495247|ref|XP_009066827.1|hypothetical protein LOTGIDRAFT_134569 [Lottia gigantea] >gi|556093821|gb|ESO82474.1| hypothetical protein LOTGIDRAFT_134569 [Lottia gigantea]	XP_009066827	2.60058e-13	76	75.0998	60
contig_111808_9.97	9.97	UNKN	hypothetical protein SARC_03241		Sphaeroforma arctica JP610	532	gi|929766919|ref|XP_014158440.1|hypothetical protein SARC_03241 [Sphaeroforma arctica JP610] >gi|906955852|gb|KNC84538.1| hypothetical protein SARC_03241 [Sphaeroforma arctica JP610]	XP_014158440	1.82063e-07	42	58.5362	154
contig_111852_13.47	13.47	Cell Cycle & Processes	cell cycle control protein 50a		Diuraphis noxia	303	gi|985402568|ref|XP_015369057.1|PREDICTED: cell cycle control protein 50A [Diuraphis noxia]	XP_015369057	6.64835e-52	93	178.333	103
contig_11221_64.97	64.97	Defense/Immune Response	calcineurin-like phosphoesterase	activates the T cells of the immune system and can be blocked by drugs	Aspergillus terreus NIH2624	580	gi|115387287|ref|XP_001211149.1|predicted protein [Aspergillus terreus NIH2624] >gi|114195233|gb|EAU36933.1| predicted protein [Aspergillus terreus NIH2624]	XP_001211149	8.0622e-13	73	73.1738	64
contig_112263_12.07	12.07	UNKN	PREDICTED: uncharacterized protein LOC107399075		Tribolium castaneum	505	gi|1008456468|ref|XP_015840241.1|PREDICTED: uncharacterized protein LOC107399075 [Tribolium castaneum]	XP_015840241	0.000844826	59	48.9062	131
contig_11323_24.54	24.54	Cell Cycle & Processes	nuclear pore complex protein nup107	esponsible for the protected exchange of components between the nucleus and cytoplasm and for preventing the transport of material not destined to cross the nuclear envelope	Tribolium castaneum	645	gi|91091274|ref|XP_969501.1|PREDICTED: nuclear pore complex protein Nup107 [Tribolium castaneum] >gi|270013089|gb|EFA09537.1| Nuclear pore complex protein Nup107-like Protein [Tribolium castaneum]	XP_969501	1.32183e-60	74	214.157	200
contig_113247_9.25	9.25	DNA Replication & Repair	exonuclease 3 -5 domain-containing protein 2		Diuraphis noxia	301	gi|985395204|ref|XP_015365039.1|PREDICTED: exonuclease 3'-5' domain-containing protein 2 [Diuraphis noxia]	XP_015365039	2.0175e-22	91	100.908	57
contig_113296_8.10	8.1	Proteolysis	serine protease		Biomphalaria glabrata	481	gi|908500368|ref|XP_013062026.1|PREDICTED: putative serine protease K12H4.7 [Biomphalaria glabrata]	XP_013062026	2.36797e-16	51	85.8853	139
contig_113339_7.31	7.31	Defense/Immune Response	virulence factor domain protein		Bordetella bronchiseptica A1-7	419	gi|633372490|gb|KDB59713.1|virulence factor BrkB domain protein [Bordetella bronchiseptica A1-7]	KDB59713	0.000180147	74	47.3654	35
contig_11393_404.74	404.74	Defense/Immune Response	attacin 2		Microdera dzhungarica	320	gi|576864472|gb|AHH34163.1|attacin 2 [Microdera dzhungarica]	AHH34163	2.79279e-08	59	58.5362	77
contig_1143_326.08	326.08	Exocuticle-related	chitin-binding protein	Chitinase	Ciona intestinalis	2135	gi|459184382|ref|XP_002120924.2|PREDICTED: chondroitin proteoglycan 2-like [Ciona intestinalis]	XP_002120924	1.31948e-40	36	169.859	698
contig_114381_6.96	6.96	Cell Cycle & Processes	neuroglian isoform x2		Diuraphis noxia	340	gi|985416359|ref|XP_015373633.1|PREDICTED: neuroglian-like [Diuraphis noxia]	XP_015373633	1.89306e-13	90	76.2554	53
contig_11520_18.31	18.31	DNA Replication & Repair	rna-directed dna polymerase from transposon partial		Tribolium castaneum	388	gi|1008451853|ref|XP_015838953.1|PREDICTED: uncharacterized protein LOC107398643 [Tribolium castaneum] >gi|1008455787|ref|XP_015840045.1| PREDICTED: uncharacterized protein LOC107398970 [Tribolium castaneum]	XP_015838953	1.02066e-27	61	114.005	127
contig_11521_16.61	16.61	DNA Replication & Repair	rna-directed dna polymerase from transposon bs-like protein		Plutella xylostella	448	gi|768424448|ref|XP_011553179.1|PREDICTED: uncharacterized protein LOC105384608 isoform X1 [Plutella xylostella] >gi|768424450|ref|XP_011553180.1| PREDICTED: uncharacterized protein LOC105384608 isoform X2 [Plutella xylostella]	XP_011553179	4.84319e-14	40	76.2554	174
contig_115659_17.55	17.55	Proteolysis	serine protease inhibitor 3-like		Fopius arisanus	376	gi|755935080|ref|XP_011315197.1|PREDICTED: serine protease inhibitor 3-like [Fopius arisanus]	XP_011315197	1.3562e-11	60	66.6254	68
contig_115763_8.60	8.6	Carbohydrate Metabolism	dolichyl-diphosphooligosaccharide--protein glycosyltransferase subunit 1		Neodiprion lecontei	442	gi|998507528|ref|XP_015514091.1|PREDICTED: dolichyl-diphosphooligosaccharide--protein glycosyltransferase subunit 1 [Neodiprion lecontei]	XP_015514091	1.07562e-13	64	78.1814	84
contig_116221_7.21	7.21	UNKN	hypothetical protein KGM_18541		Danaus plexippus	318	gi|357612321|gb|EHJ67915.1|hypothetical protein KGM_18541 [Danaus plexippus]	EHJ67915	4.44194e-22	75	80.8777	56
contig_11629_47.17	47.17	UNKN	PREDICTED: uncharacterized protein LOC103509026		Diaphorina citri	769	gi|662184445|ref|XP_008471843.1|PREDICTED: uncharacterized protein LOC103509026 [Diaphorina citri]	XP_008471843	4.16069e-07	57	57.7658	87
contig_1164_1.082.41	1082.41	Proteolysis	testican-2 isoform x2	Several functions of this gene product have now been demonstrated in vitro including membrane-type matrix metalloproteinase inhibition, cathepsin L inhibition, and low-affinity calcium binding	Tribolium castaneum	3419	gi|91076250|ref|XP_966964.1|PREDICTED: testican-2 isoform X2 [Tribolium castaneum] >gi|1004403144|gb|KYB29414.1| hypothetical protein TcasGA2_TC034543 [Tribolium castaneum]	XP_966964	0	85	634.41	499
contig_117162_12.24	12.24	Proteolysis	astacin	metallopeptidases	Hydra vulgaris	656	gi|830260307|ref|NP_001296695.1|zinc metalloproteinase nas-15-like precursor [Hydra vulgaris] >gi|5579501|gb|AAA92361.2| metalloproteinase 1 [Hydra vulgaris]	NP_001296695	1.28667e-10	48	68.9366	153
contig_117443_13.76	13.76	Proteolysis	carboxypeptidase e-like		Acyrthosiphon pisum	310	gi|641648739|ref|XP_008183303.1|PREDICTED: LOW QUALITY PROTEIN: carboxypeptidase D-like [Acyrthosiphon pisum]	XP_008183303	4.50697e-44	88	163.696	90
contig_117846_7.07	7.07	UNKN	protein dd3-3-like		Hydra vulgaris	320	gi|828217942|ref|XP_012560814.1|PREDICTED: protein DD3-3-like, partial [Hydra vulgaris]	XP_012560814	3.74832e-26	65	108.612	98
contig_118393_5.55	5.55	UNKN	upf0554 protein c2orf43 homolog		Diuraphis noxia	495	gi|985412645|ref|XP_015371842.1|PREDICTED: uncharacterized protein LOC107167346 [Diuraphis noxia]	XP_015371842	5.70596e-24	93	91.6633	47
contig_118602_6.77	6.77	Signal Tranduction	interference hedgehog		Zootermopsis nevadensis	318	gi|646720794|gb|KDR22391.1|Interference hedgehog [Zootermopsis nevadensis]	KDR22391	6.55153e-13	76	75.0998	55
contig_118735_5.62	5.62	Other	protein quiver		Ceratosolen solmsi marchali	409	gi|766922678|ref|XP_011505925.1|PREDICTED: uncharacterized protein LOC105368589 [Ceratosolen solmsi marchali]	XP_011505925	1.00961e-40	77	144.821	103
contig_118804_6.00	6	Proteolysis	venom protease-like		Diuraphis noxia	451	gi|985387426|ref|XP_015374853.1|PREDICTED: uncharacterized protein LOC107169577 [Diuraphis noxia]	XP_015374853	3.66904e-21	85	100.523	60
contig_1206_2.056.66	2056.66	detoxification	superoxide dismutase	In higher plants, superoxide dismutase enzymes (SODs) act as antioxidants	Oryctes borbonicus	964	gi|952542848|gb|KRT86907.1|hypothetical protein AMK59_2413 [Oryctes borbonicus]	KRT86907	7.16097e-43	69	157.532	148
contig_120691_5.05	5.05	UNKN	endosulphine family protein	No function has yet been assigned	Rhizopus delemar RA 99-880	328	gi|384489742|gb|EIE80964.1|hypothetical protein RO3G_05669 [Rhizopus delemar RA 99-880]	EIE80964	6.97408e-34	98	124.79	63
contig_120696_12.85	12.85	UNKN	receptor expression-enhancing protein 5		Aphanomyces astaci	416	gi|698803378|ref|XP_009834718.1|hypothetical protein H257_10003 [Aphanomyces astaci] >gi|574110087|gb|ETV75587.1| hypothetical protein H257_10003 [Aphanomyces astaci]	XP_009834718	1.4254e-29	74	117.472	94
contig_1207_284.68	284.68	UNKN	PREDICTED: uncharacterized protein LOC100142247		Tribolium castaneum	1957	gi|189236872|ref|XP_001815706.1|PREDICTED: uncharacterized protein LOC100142247 [Tribolium castaneum] >gi|270006303|gb|EFA02751.1| hypothetical protein TcasGA2_TC008484 [Tribolium castaneum]	XP_001815706	1.58151e-57	60	211.075	306
contig_120870_11.50	11.5	Other	mariner transposase		Chrysoperla plorabunda	301	gi|156618|gb|AAA28265.1|mariner transposase [Chrysoperla plorabunda] >gi|600837|gb|AAC46947.1| mariner transposase [Chrysoperla plorabunda]	AAA28265	1.72387e-20	77	79.337	59
contig_1211_411.61	411.61	Defense/Immune Response	thaumatin-like protein	Thaumatin production is induced in katemfe in response to an attack upon the plant by viroid pathogens	Schistocerca gregaria	1508	gi|40949967|gb|AAR97603.1|thaumatin-like protein 1 [Schistocerca gregaria]	AAR97603	1.07885e-21	64	104.375	98
contig_12208_85.56	85.56	Transport	zinc transporter foi		Tribolium castaneum	2517	gi|91086723|ref|XP_970869.1|PREDICTED: zinc transporter foi [Tribolium castaneum] >gi|642928895|ref|XP_008195606.1| PREDICTED: zinc transporter foi [Tribolium castaneum] >gi|1004397763|gb|KYB26289.1| Zinc transporter foi-like Protein [Tribolium castaneum]	XP_970869	2.8304e-176	64	534.643	679
contig_122143_10.22	10.22	OX-REDOX	related to dopa -dioxygenase ec= --amanita muscaria		Phytophthora sojae	328	gi|695376225|ref|XP_009515732.1|hypothetical protein PHYSODRAFT_470531 [Phytophthora sojae] >gi|348688643|gb|EGZ28457.1| hypothetical protein PHYSODRAFT_470531 [Phytophthora sojae]	XP_009515732	3.76162e-08	63	58.151	63
contig_12334_75.90	75.9	UNKN	probable glutamate receptor		Brugia malayi	1824	gi|671415321|emb|CDQ04418.1|BMA-GLR-1, isoform a, partial [Brugia malayi]	CDQ04418	8.62862e-54	52	206.068	434
contig_124275_5.85	5.85	UNKN	PREDICTED: uncharacterized protein LOC103308903		Acyrthosiphon pisum	305	gi|641660061|ref|XP_008181354.1|PREDICTED: uncharacterized protein LOC103308903 [Acyrthosiphon pisum]	XP_008181354	1.02956e-11	69	60.8474	66
contig_124400_7.31	7.31	Proteolysis	serpin peptidase inhibitor 1		Tribolium castaneum	523	gi|91088641|ref|XP_974388.1|PREDICTED: alaserpin [Tribolium castaneum] >gi|270012729|gb|EFA09177.1| serpin peptidase inhibitor 7 [Tribolium castaneum]	XP_974388	2.72807e-37	62	143.665	170
contig_12476_7.53	7.53	Transport	facilitated trehalose transporter tret1		Phaedon cochleariae	740	gi|571330974|gb|AHF27419.1|putative sugar transporter 5 [Phaedon cochleariae]	AHF27419	3.99024e-35	56	141.354	235
contig_12576_7.81	7.81	Defense/Immune Response	glutathione peroxidase		Reticulomyxa filosa	422	gi|569358509|gb|ETO07126.1|glutathione peroxidase [Reticulomyxa filosa]	ETO07126	1.91321e-08	80	60.077	47
contig_12603_15.52	15.52	UNKN	PREDICTED: uncharacterized protein LOC661370		Tribolium castaneum	770	gi|91081745|ref|XP_976384.1|PREDICTED: uncharacterized protein LOC661370 [Tribolium castaneum] >gi|1004401107|gb|KYB28170.1| hypothetical protein TcasGA2_TC032933 [Tribolium castaneum]	XP_976384	2.55618e-06	46	56.9954	223
contig_126772_7.50	7.5	UNKN	PREDICTED: uncharacterized protein LOC100169047		Acyrthosiphon pisum	300	gi|328713029|ref|XP_001943126.2|PREDICTED: uncharacterized protein LOC100169047 [Acyrthosiphon pisum]	XP_001943126	1.79261e-33	87	132.109	88
contig_1277_2.037.36	2037.36	Protein & Amino Acid Metabolism	tyrosine-protein phosphatase lar-like protein		Tribolium castaneum	4561	gi|1004398372|gb|KYB26639.1|Tyrosine-protein phosphatase Lar-like Protein [Tribolium castaneum]	KYB26639	8.5348e-160	65	518.464	580
contig_128160_7.43	7.43	UNKN	omega-scoloptoxin-ssm1a isoform x1		Coptotermes formosanus	306	gi|506968725|gb|AGM32706.1|uncharacterized protein [Coptotermes formosanus]	AGM32706	9.18894e-34	73	126.331	93
contig_128211_9.06	9.06	DNA Replication & Repair	tumor suppressor candidate 3		Acyrthosiphon pisum	507	gi|641672251|ref|XP_008185869.1|PREDICTED: tumor suppressor candidate 3 [Acyrthosiphon pisum]	XP_008185869	1.75965e-74	99	238.424	116
contig_12845_61.62	61.62	UNKN	PREDICTED: uncharacterized protein LOC103313889		Tribolium castaneum	794	gi|642927694|ref|XP_008196569.1|PREDICTED: uncharacterized protein LOC103313889 [Tribolium castaneum] >gi|1004398339|gb|EFA06659.2| hypothetical protein TcasGA2_TC009585 [Tribolium castaneum]	XP_008196569	1.3088e-13	57	76.2554	141
contig_12858_31.54	31.54	UNKN	PREDICTED: uncharacterized protein LOC107174016		Diuraphis noxia	981	gi|985391211|ref|XP_015380300.1|PREDICTED: uncharacterized protein LOC107174016 [Diuraphis noxia]	XP_015380300	3.79087e-35	66	137.502	156
contig_12861_200.02	200.02	UNKN	agap009935-pa-like protein		Anopheles darlingi	445	gi|568259786|gb|ETN67631.1|hypothetical protein AND_000546 [Anopheles darlingi]	ETN67631	1.97204e-39	94	140.969	75
contig_128732_9.42	9.42	UNKN	uncharacterized protein LOC100166506		Acyrthosiphon pisum	349	gi|240849519|ref|NP_001155709.1|uncharacterized protein LOC100166506 [Acyrthosiphon pisum] >gi|239791232|dbj|BAH72111.1| ACYPI007372 [Acyrthosiphon pisum]	NP_001155709	6.0486e-19	100	88.9669	43
contig_12963_115.57	115.57	Other	protein quiver-like		Tribolium castaneum	872	gi|642932768|ref|XP_008196975.1|PREDICTED: uncharacterized protein LOC662560 [Tribolium castaneum] >gi|1004396823|gb|EFA07943.2| hypothetical protein TcasGA2_TC005524 [Tribolium castaneum]	XP_008196975	7.03633e-66	77	215.312	149
contig_129956_5.21	5.21	Defense/Immune Response	PREDICTED: peritrophin-1-like	Therefore, the bacteria and chitin binding activities of the peritrophin-like protein suggest that it may plays a role in immune defense	Megachile rotundata	333	gi|383854386|ref|XP_003702702.1|PREDICTED: peritrophin-1-like [Megachile rotundata]	XP_003702702	4.14762e-05	55	48.9062	80
contig_131054_5.43	5.43	Sensory Response	ejaculatory bulb-specific protein 3		Musca domestica	400	gi|557765137|ref|XP_005182272.1|PREDICTED: ejaculatory bulb-specific protein 3-like [Musca domestica]	XP_005182272	8.9984e-23	76	97.8265	84
contig_131847_6.15	6.15	UNKN	PREDICTED: uncharacterized protein LOC103519961, partial		Diaphorina citri	305	gi|662218480|ref|XP_008483272.1|PREDICTED: uncharacterized protein LOC103519961, partial [Diaphorina citri]	XP_008483272	6.49955e-06	65	47.3654	47
contig_13192_10.49	10.49	UNKN	uncharacterized protein LOC100159063 precursor		Acyrthosiphon pisum	842	gi|240849255|ref|NP_001155386.1|uncharacterized protein LOC100159063 precursor [Acyrthosiphon pisum] >gi|239793637|dbj|BAH72924.1| ACYPI000472 [Acyrthosiphon pisum]	NP_001155386	4.42382e-65	64	218.779	258
contig_132076_10.21	10.21	Defense/Immune Response	bcl-2-like protein 1	Bcl-2 (B-cell lymphoma 2), encoded in humans by the BCL2 gene, is the founding member of the Bcl-2 family of regulator proteins that regulate cell death (apoptosis)	Diachasma alloeum	300	gi|970908641|ref|XP_015120417.1|PREDICTED: uncharacterized protein LOC107043421 [Diachasma alloeum]	XP_015120417	2.7661e-09	54	61.2326	97
contig_132238_10.95	10.95	UNKN	PREDICTED: uncharacterized protein LOC106691662		Halyomorpha halys	301	gi|939697688|ref|XP_014292999.1|PREDICTED: uncharacterized protein LOC106691662 [Halyomorpha halys]	XP_014292999	0.000113232	56	48.1358	88
contig_132554_7.61	7.61	Defense/Immune Response	PREDICTED: hemocytin	These proteins are involved in the process of sclerotization of arthropod cuticle, in wound healing, and humoral immune defense	Megachile rotundata	444	gi|805767304|ref|XP_012135564.1|PREDICTED: hemocytin [Megachile rotundata]	XP_012135564	0.000509283	54	49.6766	48
contig_133372_5.73	5.73	UNKN	erp1 protein partial		Metarhizium acridum CQMa 102	307	gi|629689881|ref|XP_007810232.1|ERP1 protein precursor [Metarhizium acridum CQMa 102] >gi|322698363|gb|EFY90134.1| ERP1 protein precursor [Metarhizium acridum CQMa 102]	XP_007810232	0.000210294	68	48.1358	38
contig_134095_6.83	6.83	Na/K-ATPase	potassium sodium hyperpolarization-activated cyclic nucleotide-gated channel 1-like		Tribolium castaneum	419	gi|91087965|ref|XP_973007.1|PREDICTED: potassium/sodium hyperpolarization-activated cyclic nucleotide-gated channel 1 [Tribolium castaneum] >gi|270012046|gb|EFA08494.1| Potassium voltage-gated channel protein eag-like Protein [Tribolium castaneum]	XP_973007	9.68489e-27	66	114.39	112
contig_134409_5.66	5.66	UNKN	peptide yy		Ictidomys tridecemlineatus	300	gi|532084851|ref|XP_005328154.1|PREDICTED: peptide YY [Ictidomys tridecemlineatus]	XP_005328154	8.85868e-05	71	47.3654	49
contig_135_3.008.80	3008.8	Defense/Immune Response	spaetzle 3	Binding to Toll activates the Toll signaling pathway	Tribolium castaneum	724	gi|1004397534|gb|KYB26146.1|hypothetical protein TcasGA2_TC030608 [Tribolium castaneum]	KYB26146	1.25378e-78	86	248.825	165
contig_135091_8.66	8.66	UNKN	hypothetical protein PHAVU_011G030700g		Phaseolus vulgaris	300	gi|593124327|ref|XP_007131648.1|hypothetical protein PHAVU_011G030700g [Phaseolus vulgaris] >gi|561004648|gb|ESW03642.1| hypothetical protein PHAVU_011G030700g [Phaseolus vulgaris]	XP_007131648	1.25589e-14	100	79.7221	55
contig_13568_160.21	160.21	Fatty Acid & Lipid Metabolism	apolipoprotein o-like protein		Tribolium castaneum	972	gi|91094685|ref|XP_967628.1|PREDICTED: MICOS complex subunit MIC27 isoform X1 [Tribolium castaneum] >gi|1004400224|gb|EFA12946.2| hypothetical protein TcasGA2_TC005066 [Tribolium castaneum]	XP_967628	2.61171e-59	69	202.216	215
contig_135736_7.10	7.1	Fatty Acid & Lipid Metabolism	low-density lipoprotein receptor-related protein 2		Exaiptasia pallida	319	gi|999973473|gb|KXJ12647.1|von Willebrand factor [Exaiptasia pallida]	KXJ12647	3.82881e-07	61	58.5362	63
contig_1358_82.12	82.12	Defense/Immune Response	carboxypeptidase n subunit 2-like		Tribolium castaneum	2515	gi|642910207|ref|XP_008198406.1|PREDICTED: leucine-rich repeats and immunoglobulin-like domains protein 3 [Tribolium castaneum]	XP_008198406	0	80	789.645	600
contig_135845_9.42	9.42	UNKN	hypothetical protein V501_00371		Pseudogymnoascus sp. VKM F-4519 (FW-2642)	361	gi|682465182|gb|KFZ19979.1|hypothetical protein V501_00371 [Pseudogymnoascus sp. VKM F-4519 (FW-2642)]	KFZ19979	5.35986e-10	63	63.1586	63
contig_13659_22.91	22.91	detoxification	esterase-6-like protein		Tribolium castaneum	1291	gi|1008429720|ref|XP_015840857.1|PREDICTED: venom carboxylesterase-6-like isoform X3 [Tribolium castaneum]	XP_015840857	1.59367e-101	63	321.627	366
contig_13680_81.12	81.12	Sensory Response	neuronal acetylcholine receptor subunit beta-3-like isoform x2		Tribolium castaneum	1803	gi|642928346|ref|XP_008195544.1|PREDICTED: neuronal acetylcholine receptor subunit beta-3-like isoform X2 [Tribolium castaneum]	XP_008195544	7.30776e-169	65	506.138	557
contig_137235_7.78	7.78	UNKN	hypothetical protein ALC60_09159		Trachymyrmex zeteki	378	gi|1012977678|gb|KYQ51731.1|hypothetical protein ALC60_09159 [Trachymyrmex zeteki]	KYQ51731	3.37994e-21	70	96.6709	125
contig_13762_418.05	418.05	Structural	peritrophic matrix protein 1-b precursor		Tribolium castaneum	767	gi|270297208|ref|NP_001161903.1|peritrophic matrix protein 1-B precursor [Tribolium castaneum] >gi|268309028|gb|ACY95480.1| peritrophic matrix protein 1-B [Tribolium castaneum] >gi|270008993|gb|EFA05441.1| hypothetical protein TcasGA2_TC015620 [Tribolium castaneum]	NP_001161903	2.00943e-27	49	115.931	210
contig_137662_10.34	10.34	UNKN	omega-scoloptoxin-ssm1a isoform x2		Coptotermes formosanus	320	gi|506968725|gb|AGM32706.1|uncharacterized protein [Coptotermes formosanus]	AGM32706	6.61974e-14	71	74.3294	53
contig_1380_24.64	24.64	Fatty Acid & Lipid Metabolism	lipase 3		Tribolium castaneum	913	gi|189236687|ref|XP_973103.2|PREDICTED: lipase 3-like [Tribolium castaneum] >gi|1004400955|gb|KYB28091.1| Lipase 3-like Protein [Tribolium castaneum]	XP_973103	1.69294e-87	72	279.641	225
contig_13825_138.50	138.5	RNA Processing	deoxyribonuclease i		Tribolium castaneum	1440	gi|642914631|ref|XP_008190292.1|PREDICTED: uncharacterized protein LOC662396 [Tribolium castaneum] >gi|1008429847|ref|XP_015840884.1| PREDICTED: uncharacterized protein LOC662396 [Tribolium castaneum]	XP_008190292	4.14533e-116	63	360.147	401
contig_138384_5.90	5.9	UNKN	tunmor s		Diuraphis noxia	437	gi|985425146|ref|XP_015378046.1|PREDICTED: uncharacterized protein LOC107172271 [Diuraphis noxia]	XP_015378046	2.10675e-35	98	132.88	67
contig_13843_283.00	283	UNKN	vanin-like protein 1		Tribolium castaneum	1753	gi|91085639|ref|XP_970529.1|PREDICTED: vanin-like protein 2 [Tribolium castaneum] >gi|270010088|gb|EFA06536.1| Vanin-like protein 2 [Tribolium castaneum]	XP_970529	2.28928e-97	56	319.316	472
contig_13846_64.17	64.17	Metabolism	e3 ubiquitin-protein ligase tm129	nitrogen compound metabolic process	Tribolium castaneum	1539	gi|642934752|ref|XP_008197796.1|PREDICTED: E3 ubiquitin-protein ligase TM129 [Tribolium castaneum] >gi|1004396539|gb|KYB25563.1| Transmembrane protein 129-like Protein [Tribolium castaneum]	XP_008197796	8.52479e-128	75	390.193	332
contig_138923_6.29	6.29	UNKN	hypothetical protein D910_01521		Dendroctonus ponderosae	367	gi|546672162|gb|ERL84155.1|hypothetical protein D910_01521 [Dendroctonus ponderosae]	ERL84155	1.1446e-05	53	51.9878	92
contig_139042_10.98	10.98	Heat Shock/Stess Response	PREDICTED: calnexin-like	Calnexin is a chaperone, characterized by assisting protein folding and quality control, ensuring that only properly folded and assembled proteins proceed further along the secretory pathway	Diuraphis noxia	300	gi|985386347|ref|XP_015369233.1|PREDICTED: calnexin-like [Diuraphis noxia] >gi|985386349|ref|XP_015369241.1| PREDICTED: calnexin-like [Diuraphis noxia]	XP_015369233	2.2639e-11	85	69.707	60
contig_140544_11.04	11.04	Development	ecdysteroid regulated-like protein		Litopenaeus vannamei	301	gi|371929005|gb|AEX59149.1|ecdysteroid regulated-like protein [Litopenaeus vannamei]	AEX59149	0.000894875	54	45.0542	64
contig_142560_5.90	5.9	Proteolysis	serine protease		Megachile rotundata	368	gi|805806410|ref|XP_012146033.1|PREDICTED: putative serine protease K12H4.7 isoform X5 [Megachile rotundata]	XP_012146033	2.34641e-11	57	70.4774	85
contig_1435_1.047.94	1047.94	Signal Tranduction	g-protein coupled receptor mth2		Tribolium castaneum	1643	gi|1004399754|gb|KYB27424.1|putative G-protein coupled receptor Mth-like 11 [Tribolium castaneum]	KYB27424	2.86501e-76	50	264.233	495
contig_1436_210.28	210.28	Proteolysis	carboxypeptidase d-like		Tribolium castaneum	4535	gi|91084647|ref|XP_966816.1|PREDICTED: carboxypeptidase D [Tribolium castaneum]	XP_966816	0	76	1658.27	1354
contig_144328_6.62	6.62	Proteolysis	renin receptor	The renin receptor also known as ATPase H(+)-transporting lysosomal accessory protein 2	Oryctes borbonicus	459	gi|952536938|gb|KRT83952.1|hypothetical protein AMK59_1944 [Oryctes borbonicus]	KRT83952	1.18114e-15	62	82.0333	88
contig_144567_6.27	6.27	UNKN	zinc finger protein zic 3-like		Acyrthosiphon pisum	454	gi|641656082|ref|XP_003242332.2|PREDICTED: uncharacterized protein LOC100573530 [Acyrthosiphon pisum]	XP_003242332	5.10473e-14	62	75.485	83
contig_14462_84.22	84.22	UNKN	PREDICTED: uncharacterized protein LOC655563		Tribolium castaneum	1517	gi|91093459|ref|XP_967209.1|PREDICTED: uncharacterized protein LOC655563 [Tribolium castaneum] >gi|1004397591|gb|KYB26184.1| hypothetical protein TcasGA2_TC033934 [Tribolium castaneum]	XP_967209	1.4257e-131	75	398.667	347
contig_14572_124.96	124.96	detoxification	venom carboxylesterase-6		Leptinotarsa decemlineata	1601	gi|728418583|gb|AIY68374.1|putative pheromone esterase, partial [Leptinotarsa decemlineata]	AIY68374	1.77219e-129	60	399.823	495
contig_14596_447.52	447.52	Fatty Acid & Lipid Metabolism	apolipoprotein d-like		Bombyx mori	647	gi|512931798|ref|XP_004932390.1|PREDICTED: apolipoprotein D-like isoform X2 [Bombyx mori]	XP_004932390	3.57026e-32	49	127.102	193
contig_146011_7.69	7.69	DNA Replication & Repair	longitudinals lacking isoforms a b d l isoform x23	Putative transcription factor required for axon growth and guidance in the central and peripheral nervous systems	Athalia rosae	300	gi|817078675|ref|XP_012261720.1|PREDICTED: longitudinals lacking protein, isoforms A/B/D/L isoform X23 [Athalia rosae]	XP_012261720	3.85494e-16	57	83.1889	85
contig_146785_7.21	7.21	UNKN	predicted protein		Naegleria gruberi	313	gi|290992799|ref|XP_002679021.1|predicted protein [Naegleria gruberi] >gi|284092636|gb|EFC46277.1| predicted protein [Naegleria gruberi]	XP_002679021	9.56638e-10	54	62.7734	79
contig_147444_5.96	5.96	RNA Processing	u3 small nucleolar rna-associated protein 6 homolog		Acyrthosiphon pisum	390	gi|641656220|ref|XP_008179885.1|PREDICTED: U3 small nucleolar RNA-associated protein 6 homolog [Acyrthosiphon pisum] >gi|641656222|ref|XP_008179886.1| PREDICTED: U3 small nucleolar RNA-associated protein 6 homolog [Acyrthosiphon pisum]	XP_008179885	2.5324e-69	93	230.335	130
contig_15172_31.29	31.29	UNKN	sparc-related modular calcium-binding protein 2 isoform x2		Tribolium castaneum	2043	gi|1004401679|gb|EFA01198.2|hypothetical protein TcasGA2_TC010525, partial [Tribolium castaneum]	EFA01198	0	70	568.926	541
contig_15236_83.46	83.46	Cell Cycle & Processes	chondroitin proteoglycan 2-like		Limulus polyphemus	3212	gi|926618339|ref|XP_013774373.1|PREDICTED: fibrillin-1-like [Limulus polyphemus]	XP_013774373	8.98481e-46	34	191.43	1069
contig_15281_34.95	34.95	Defense/Immune Response	immune responsive protein 30		Vespa mandarinia japonica	1421	gi|429836508|dbj|BAM72561.1|immune responsive protein 30 [Vespa mandarinia japonica]	BAM72561	0.000188477	59	53.9138	83
contig_1536_319.95	319.95	DNA Replication & Repair	tumor suppressor candidate 3		Tribolium castaneum	1125	gi|91081359|ref|XP_971395.1|PREDICTED: tumor suppressor candidate 3 [Tribolium castaneum] >gi|270005188|gb|EFA01636.1| Tumor suppressor candidate 3-like Protein [Tribolium castaneum]	XP_971395	8.46407e-176	86	505.368	327
contig_15506_566.55	566.55	Sensory Response	ejaculatory bulb-specific protein 3-like		Aedes aegypti	702	gi|157125744|ref|XP_001660760.1|AAEL001975-PA [Aedes aegypti] >gi|108882613|gb|EAT46838.1| AAEL001975-PA [Aedes aegypti]	XP_001660760	2.38477e-25	66	107.457	126
contig_1557_113.26	113.26	UNKN	zinc finger bed domain-containing protein 5-like		Diaphorina citri	3482	gi|662220831|ref|XP_008484571.1|PREDICTED: uncharacterized protein LOC103521244 [Diaphorina citri]	XP_008484571	9.59285e-24	60	118.242	186
contig_15738_62.00	62	Other	receptor-type tyrosine-protein phosphatase f-like isoform x3		Orussus abietinus	557	gi|817196930|ref|XP_012274066.1|PREDICTED: receptor-type tyrosine-protein phosphatase F-like isoform X3 [Orussus abietinus]	XP_012274066	6.84072e-06	48	55.8398	99
contig_15795_14.44	14.44	Defense/Immune Response	leucine-rich repeats and immunoglobulin-like domains protein 3		Tribolium castaneum	1779	gi|642910513|ref|XP_008200245.1|PREDICTED: leucine-rich repeats and immunoglobulin-like domains protein 2 isoform X1 [Tribolium castaneum]	XP_008200245	0	75	556.214	522
contig_1597_751.14	751.14	Defense/Immune Response	icarapin-like	bee venom protein (a defensive toxin)	Tribolium castaneum	929	gi|91080821|ref|XP_966682.1|PREDICTED: uncharacterized protein LOC658984 [Tribolium castaneum] >gi|270005906|gb|EFA02354.1| Icarapin-like [Tribolium castaneum]	XP_966682	2.38001e-24	58	109.768	180
contig_16103_7.37	7.37	UNKN	PREDICTED: uncharacterized protein LOC655640		Tribolium castaneum	483	gi|642935181|ref|XP_008199681.1|PREDICTED: uncharacterized protein LOC655640 [Tribolium castaneum] >gi|642935183|ref|XP_008199682.1| PREDICTED: uncharacterized protein LOC655640 [Tribolium castaneum] >gi|1008453058|ref|XP_015839246.1| PREDICTED: uncharacterized protein LOC655640 [Tribolium castaneum] >gi|1004395955|gb|KYB25227.1| hypothetical protein TcasGA2_TC034367 [Tribolium castaneum]	XP_008199681	2.97888e-63	86	216.083	129
contig_1612_183.85	183.85	detoxification	udp-glucuronosyltransferase 2a3 isoform x1		Tribolium castaneum	1575	gi|1008451560|ref|XP_015838843.1|PREDICTED: UDP-glucuronosyltransferase 2A3 isoform X1 [Tribolium castaneum]	XP_015838843	5.59529e-106	58	339.347	484
contig_1662_98.56	98.56	Development	ecdysteroid udp-glucosyltransferase-like protein		Tribolium castaneum	818	gi|1008434021|ref|XP_015833980.1|PREDICTED: UDP-glucuronosyltransferase 2B7 isoform X1 [Tribolium castaneum]	XP_015833980	1.31807e-42	57	163.696	253
contig_167_19.72	19.72	UNKN	neurofilament heavy polypeptide		Diuraphis noxia	390	gi|985415568|ref|XP_015373190.1|PREDICTED: uncharacterized protein LOC107168330 [Diuraphis noxia]	XP_015373190	1.71022e-38	98	146.747	108
contig_16739_85.03	85.03	UNKN	PREDICTED: uncharacterized protein LOC103315121		Tribolium castaneum	777	gi|642913920|ref|XP_008201214.1|PREDICTED: uncharacterized protein LOC103315121 [Tribolium castaneum] >gi|270001641|gb|EEZ98088.1| hypothetical protein TcasGA2_TC000501 [Tribolium castaneum]	XP_008201214	2.44541e-35	76	134.806	104
contig_16836_46.71	46.71	UNKN	kelch domain-containing protein 10 homolog	the large diversity of domain architectures and limited sequence identity between kelch motifs make characterisation of the kelch superfamily difficult	Tribolium castaneum	2236	gi|642935340|ref|XP_968306.2|PREDICTED: kelch domain-containing protein 10 homolog [Tribolium castaneum]	XP_968306	0	79	545.043	389
contig_16858_30.84	30.84	Development	prominin-like protein isoform x3		Oryctes borbonicus	766	gi|952511719|gb|KRT78569.1|hypothetical protein AMK59_8578 [Oryctes borbonicus]	KRT78569	9.34359e-08	55	62.7734	121
contig_17029_88.16	88.16	UNKN	tm2 domain-containing protein cg11103	The function of this domain is unknown	Tribolium castaneum	868	gi|91076460|ref|XP_971892.1|PREDICTED: TM2 domain-containing protein CG11103 [Tribolium castaneum] >gi|270002428|gb|EEZ98875.1| TM2 domain-containing protein CG11103-like Protein [Tribolium castaneum]	XP_971892	2.07906e-70	85	227.639	170
contig_17030_45.77	45.77	Transport	nose resistant to fluoxetine protein 6-like	Plays a role in the uptake of a range of molecules including lipids and xenobiotic compounds from the intestine to surrounding tissues. Mediates transport of lipids from intestine to the reproductive tract.	Tribolium castaneum	1816	gi|1008444378|ref|XP_008200185.2|PREDICTED: O-acetyltransferase OatA [Tribolium castaneum] >gi|1004398480|gb|KYB26695.1| Nose resistant to fluoxetine protein 6-like protein [Tribolium castaneum]	XP_008200185	3.17206e-51	51	197.593	443
contig_17040_36.38	36.38	UNKN	transmembrane protein 131 isoform x1		Tribolium castaneum	3086	gi|642919747|ref|XP_008192048.1|PREDICTED: transmembrane protein 131 [Tribolium castaneum]	XP_008192048	0	78	1264.6	1000
contig_1710_322.31	322.31	Transport	mam and ldl-receptor class a domain-containing protein 2-like	The LDL receptor binds LDL and transports it into cells by acidic endocytosis	Tribolium castaneum	2289	gi|189238404|ref|XP_001812043.1|PREDICTED: MAM and LDL-receptor class A domain-containing protein 1 [Tribolium castaneum] >gi|270009293|gb|EFA05741.1| hypothetical protein TcasGA2_TC015640 [Tribolium castaneum]	XP_001812043	7.86117e-136	68	425.631	356
contig_17107_69.95	69.95	Transport	nucleoporin nup43	Bidirectional transport of macromolecules between the cytoplasm and nucleus occurs through nuclear pore complexes	Tribolium castaneum	1785	gi|91092542|ref|XP_968010.1|PREDICTED: nucleoporin Nup43 [Tribolium castaneum] >gi|270006621|gb|EFA03069.1| Nucleoporin Nup43-like Protein [Tribolium castaneum]	XP_968010	8.55284e-16	64	89.3521	91
contig_17126_77.53	77.53	Defense/Immune Response	sodium channel protein 60e-like protein		Tribolium castaneum	1643	gi|1008446881|ref|XP_008196012.2|PREDICTED: leucine-rich repeat-containing protein 70-like [Tribolium castaneum]	XP_008196012	4.24114e-104	65	330.102	354
contig_17191_7.37	7.37	Development	zinc finger protein on ecdysone puffs-like	is a steroidal prohormone of the major insect molting hormone 20-hydroxyecdysone	Acyrthosiphon pisum	419	gi|193584708|ref|XP_001951973.1|PREDICTED: zinc finger protein on ecdysone puffs-like [Acyrthosiphon pisum]	XP_001951973	1.21199e-64	98	164.851	75
contig_17199_27.90	27.9	Cell Cycle & Processes	nipped-b-like protein b	facilitates transcriptional activation of the cut and Ultrabithorax genes	Oryctes borbonicus	1428	gi|952538016|gb|KRT84491.1|hypothetical protein AMK59_1526 [Oryctes borbonicus]	KRT84491	0	86	719.924	487
contig_17286_28.53	28.53	Transport	nose resistant to fluoxetine protein 6-like		Tribolium castaneum	862	gi|1008453676|ref|XP_015839404.1|PREDICTED: nose resistant to fluoxetine protein 6-like [Tribolium castaneum]	XP_015839404	1.47625e-32	55	132.494	226
contig_1736_1.137.68	1137.68	Fatty Acid & Lipid Metabolism	apolipoprotein d-like		Megachile rotundata	724	gi|383848263|ref|XP_003699771.1|PREDICTED: apolipoprotein D-like isoform X2 [Megachile rotundata]	XP_003699771	9.87308e-55	65	186.037	187
contig_17416_94.11	94.11	Metabolism	sulfatase-modifying factor 1		Tribolium castaneum	1104	gi|642921679|ref|XP_969670.3|PREDICTED: sulfatase-modifying factor 1 [Tribolium castaneum] >gi|1004400306|gb|EFA04519.2| Sulfatase-modifying factor 1-like Protein [Tribolium castaneum]	XP_969670	9.64226e-130	76	387.882	298
contig_17709_36.36	36.36	Development	ecdysteroid udp-glucosyltransferase-like protein		Tribolium castaneum	1644	gi|1008434023|ref|XP_015833981.1|PREDICTED: UDP-glucuronosyltransferase 2B7 isoform X2 [Tribolium castaneum]	XP_015833981	1.04637e-155	65	468.389	504
contig_1795_8.34	8.34	Other	4-coumarate-- ligase 1-like	the last enzyme of the general phenylpropanoid pathway, provides precursors for the biosynthesis of a large variety of plant natural product	Tribolium castaneum	515	gi|1008430978|ref|XP_015833079.1|PREDICTED: 4-coumarate--CoA ligase 1 [Tribolium castaneum] >gi|1008430980|ref|XP_015833080.1| PREDICTED: 4-coumarate--CoA ligase 1 [Tribolium castaneum] >gi|1004402291|gb|EEZ99576.2| Luciferin 4-monooxygenase-like Protein [Tribolium castaneum]	XP_015833079	6.47011e-18	54	90.8929	148
contig_17989_34.40	34.4	Structural	glycine-rich cell wall structural isoform x2		Diuraphis noxia	1665	gi|985403049|ref|XP_015369322.1|PREDICTED: glycine-rich cell wall structural protein 1.0-like isoform X2 [Diuraphis noxia]	XP_015369322	4.16569e-62	80	216.853	250
contig_18002_26.54	26.54	UNKN	pleiotrophin-like protein	role in the body is unclear	Diuraphis noxia	732	gi|985393867|ref|XP_015364305.1|PREDICTED: uncharacterized protein LOC107162091 [Diuraphis noxia]	XP_015364305	2.01939e-39	97	145.591	73
contig_18018_11.91	11.91	UNKN	zinc finger protein ozf-like		Trichogramma pretiosum	923	gi|936692686|ref|XP_014224332.1|PREDICTED: zinc finger protein 43-like [Trichogramma pretiosum]	XP_014224332	1.47382e-32	57	136.346	190
contig_18077_12.73	12.73	Defense/Immune Response	gram negative bacteria binding protein 1	a pattern recognition receptor for lipopolysaccharide and beta-1,3-glucan that mediates the signaling for the induction of innate immune genes in Drosophila melanogaster cells	Dendroctonus ponderosae	1363	gi|546684219|gb|ERL93924.1|hypothetical protein D910_11210 [Dendroctonus ponderosae]	ERL93924	1.94315e-88	62	286.96	379
contig_18169_131.00	131	Fatty Acid & Lipid Metabolism	apolipoprotein d-like		Athalia rosae	719	gi|817067974|ref|XP_012255906.1|PREDICTED: apolipoprotein D-like [Athalia rosae]	XP_012255906	4.42313e-48	62	169.088	185
contig_18364_43.52	43.52	Transport	nose resistant to fluoxetine protein 6-like		Tribolium castaneum	774	gi|642937088|ref|XP_008198687.1|PREDICTED: nose resistant to fluoxetine protein 6 isoform X1 [Tribolium castaneum] >gi|270000892|gb|EEZ97339.1| Nose resistant to fluoxetine protein 6-like Protein [Tribolium castaneum]	XP_008198687	1.1264e-52	75	192.971	151
contig_18392_20.66	20.66	UNKN	PREDICTED: uncharacterized protein LOC103314048		Tribolium castaneum	1356	gi|642932317|ref|XP_008197062.1|PREDICTED: uncharacterized protein LOC103314048 [Tribolium castaneum] >gi|1004397140|gb|EFA08774.2| hypothetical protein TcasGA2_TC006464 [Tribolium castaneum]	XP_008197062	6.55345e-10	57	68.5514	84
contig_18442_47.13	47.13	Carbohydrate Metabolism	barwin-like endoglucanase		Wallemia mellicola CBS 633.66	628	gi|588255050|ref|XP_006956701.1|hypothetical protein WALSEDRAFT_31439 [Wallemia mellicola CBS 633.66] >gi|388583012|gb|EIM23315.1| hypothetical protein WALSEDRAFT_31439 [Wallemia mellicola CBS 633.66]	XP_006956701	1.03112e-61	100	200.29	119
contig_1845_9.18	9.18	UNKN	uncharacterized protein LOC100160953 precursor		Acyrthosiphon pisum	777	gi|242247617|ref|NP_001156099.1|uncharacterized protein LOC100160953 precursor [Acyrthosiphon pisum] >gi|239789946|dbj|BAH71566.1| ACYPI002217 [Acyrthosiphon pisum]	NP_001156099	1.25651e-82	92	256.914	154
contig_18476_82.39	82.39	DNA Replication & Repair	four and a half lim domains protein 2 isoform x5	May function as a molecular transmitter linking various signaling pathways to transcriptional regulation. Negatively regulates the transcriptional repressor	Tribolium castaneum	363	gi|1004400061|gb|EFA03661.2|Protein espinas-like Protein [Tribolium castaneum]	EFA03661	2.58944e-17	79	85.5001	53
contig_1849_689.57	689.57	Proteolysis	serine protease easter-like		Dendroctonus ponderosae	676	gi|478249680|gb|ENN70190.1|hypothetical protein YQE_13086, partial [Dendroctonus ponderosae]	ENN70190	3.32576e-20	65	96.6709	112
contig_18712_121.05	121.05	Other	endoplasmic reticulum resident protein 29		Oryctes borbonicus	1158	gi|952520832|gb|KRT81122.1|hypothetical protein AMK59_5402 [Oryctes borbonicus]	KRT81122	9.0128e-86	75	273.092	228
contig_19109_38.72	38.72	Fatty Acid & Lipid Metabolism	apolipoprotein d-like		Danaus plexippus	687	gi|357605980|gb|EHJ64856.1|hypothetical protein KGM_18288 [Danaus plexippus]	EHJ64856	4.2388e-27	47	114.005	190
contig_19236_17.72	17.72	Other	protein takeout-like		Diuraphis noxia	1147	gi|985384610|ref|XP_015364072.1|PREDICTED: protein takeout-like [Diuraphis noxia]	XP_015364072	4.90334e-125	90	373.629	245
contig_19339_100.00	100	Fatty Acid & Lipid Metabolism	apolipophorin-3-like precursor		Acyrthosiphon pisum	897	gi|662242666|ref|NP_001284568.1|apolipophorin-3-like precursor [Acyrthosiphon pisum] >gi|641682011|ref|XP_008189678.1| PREDICTED: apolipophorin-3-like [Acyrthosiphon pisum] >gi|239789136|dbj|BAH71213.1| ACYPI008569 [Acyrthosiphon pisum]	NP_001284568	4.52571e-86	91	268.855	187
contig_19509_30.24	30.24	UNKN	PREDICTED: uncharacterized protein LOC100141683 isoform X2		Tribolium castaneum	1487	gi|189239736|ref|XP_001809239.1|PREDICTED: uncharacterized protein LOC100141683 isoform X2 [Tribolium castaneum] >gi|270011260|gb|EFA07708.1| hypothetical protein TcasGA2_TC002185 [Tribolium castaneum]	XP_001809239	7.06544e-84	74	272.322	234
contig_19533_16.81	16.81	Cell Cycle & Processes	nuclear envelope integral membrane protein 1		Tribolium castaneum	1408	gi|91076588|ref|XP_968186.1|PREDICTED: nuclear envelope integral membrane protein 1 [Tribolium castaneum] >gi|270002381|gb|EEZ98828.1| Transmembrane protein 194A-like Protein [Tribolium castaneum]	XP_968186	5.88534e-158	78	466.463	377
contig_19799_29.56	29.56	UNKN	PREDICTED: uncharacterized protein LOC660498		Tribolium castaneum	634	gi|642932389|ref|XP_008197091.1|PREDICTED: uncharacterized protein LOC660498 [Tribolium castaneum] >gi|1008449433|ref|XP_015838274.1| PREDICTED: uncharacterized protein LOC660498 [Tribolium castaneum] >gi|270011591|gb|EFA08039.1| hypothetical protein TcasGA2_TC005632 [Tribolium castaneum]	XP_008197091	2.50897e-25	62	107.457	110
contig_1984_80.07	80.07	Defense/Immune Response	meteorin-like protein	Meteorin-like is a hormone that regulates immune-adipose interactions	Tribolium castaneum	1873	gi|91078226|ref|XP_969763.1|PREDICTED: meteorin-like protein [Tribolium castaneum]	XP_969763	4.59159e-145	81	435.647	305
contig_19885_24.99	24.99	Other	receptor-type tyrosine-protein phosphatase f-like isoform x1		Tribolium castaneum	3987	gi|642927195|ref|XP_008195175.1|PREDICTED: uncharacterized protein LOC662380 isoform X1 [Tribolium castaneum]	XP_008195175	0	64	893.264	1022
contig_20118_65.13	65.13	UNKN	PREDICTED: uncharacterized protein LOC662524		Tribolium castaneum	1216	gi|91089157|ref|XP_973708.1|PREDICTED: uncharacterized protein LOC662524 [Tribolium castaneum] >gi|270012450|gb|EFA08898.1| hypothetical protein TcasGA2_TC006599 [Tribolium castaneum]	XP_973708	9.62998e-59	80	200.29	131
contig_20190_26.46	26.46	UNKN	integral membrane protein dgcr2 idd		Oryctes borbonicus	2327	gi|952513204|gb|KRT79818.1|hypothetical protein AMK59_7146 [Oryctes borbonicus]	KRT79818	9.09275e-73	72	260.381	255
contig_203_2.264.15	2264.15	UNKN	hypothetical protein JGI2_00576, partial		bacterium JGI-2	1133	gi|962404330|emb|CUU10504.1|hypothetical protein JGI2_00576, partial [bacterium JGI-2]	CUU10504	0.000940369	65	51.9878	41
contig_2062_47.01	47.01	UNKN	tm2 domain-containing protein cg10795		Tribolium castaneum	2169	gi|91087331|ref|XP_975597.1|PREDICTED: TM2 domain-containing protein CG10795 [Tribolium castaneum] >gi|1004397901|gb|EFA07665.2| TM2 domain-containing protein CG10795-like Protein [Tribolium castaneum]	XP_975597	9.20371e-84	86	275.404	179
contig_21145_30.95	30.95	UNKN	coagulation factor v-like		Saccoglossus kowalevskii	1057	gi|585723445|ref|XP_006813642.1|PREDICTED: coagulation factor V-like [Saccoglossus kowalevskii]	XP_006813642	3.6364e-07	43	62.3882	193
contig_21186_11.98	11.98	Heat Shock/Stess Response	dnaj homolog subfamily c member 16		Tribolium castaneum	531	gi|642933781|ref|XP_008197271.1|PREDICTED: dnaJ homolog subfamily C member 16 isoform X2 [Tribolium castaneum] >gi|270013594|gb|EFA10042.1| DnaJ homolog subfamily C member 16-like Protein [Tribolium castaneum]	XP_008197271	7.18846e-51	72	184.882	161
contig_21193_34.26	34.26	DNA Replication & Repair	transcriptional regulator atrx homolog		Oryctes borbonicus	1636	gi|952537992|gb|KRT84479.1|helicase [Oryctes borbonicus]	KRT84479	2.20168e-146	67	462.611	535
contig_212_638.09	638.09	RNA Processing	sid1 transmembrane family member 1		Tribolium castaneum	4687	gi|270014245|gb|EFA10693.1|systemic RNA interference defective protein 1 [Tribolium castaneum]	EFA10693	0	70	764.992	748
contig_21332_32.66	32.66	UNKN	protein partial		Tribolium castaneum	449	gi|642918086|ref|XP_008193946.1|PREDICTED: uncharacterized protein LOC103313170 isoform X2 [Tribolium castaneum] >gi|1004401483|gb|EEZ99620.2| hypothetical protein TcasGA2_TC002138 [Tribolium castaneum]	XP_008193946	1.15486e-24	69	111.309	94
contig_21619_108.55	108.55	UNKN	nuclear envelope phosphatase-regulatory subunit 1 isoform x1		Tribolium castaneum	723	gi|642917992|ref|XP_008198973.1|PREDICTED: nuclear envelope phosphatase-regulatory subunit 1 isoform X2 [Tribolium castaneum]	XP_008198973	3.06103e-64	93	208.379	127
contig_21679_84.12	84.12	Fatty Acid & Lipid Metabolism	apolipoprotein d-like		Athalia rosae	657	gi|817067974|ref|XP_012255906.1|PREDICTED: apolipoprotein D-like [Athalia rosae]	XP_012255906	4.87885e-51	64	175.637	185
contig_21704_12.18	12.18	Proteolysis	gpi transamidase component pig-t	This gene encodes a member of the cysteine protease family	Rhizophagus irregularis DAOM 197198w	331	gi|595508951|gb|EXX79996.1|Gpi16p [Rhizophagus irregularis DAOM 197198w]	EXX79996	9.00492e-21	65	92.8189	90
contig_21858_37.01	37.01	UNKN	PREDICTED: uncharacterized protein LOC100142231		Tribolium castaneum	2595	gi|642915894|ref|XP_008190797.1|PREDICTED: uncharacterized protein LOC100142231 [Tribolium castaneum] >gi|1004402138|gb|EFA00531.2| hypothetical protein TcasGA2_TC003396 [Tribolium castaneum]	XP_008190797	0	89	725.702	438
contig_2190_46.07	46.07	Proteolysis	pradc1-like protein	PRADC1 protease-associated domain containing 1	Tribolium castaneum	1190	gi|642912561|ref|XP_008200911.1|PREDICTED: PRADC1-like protein isoform X2 [Tribolium castaneum]	XP_008200911	1.28239e-103	84	317.775	207
contig_2200_199.70	199.7	Defense/Immune Response	protein toll-like		Tribolium castaneum	1929	gi|270002876|gb|EEZ99323.1|toll-like protein [Tribolium castaneum]	EEZ99323	2.33974e-40	48	169.474	602
contig_22094_121.13	121.13	Carbohydrate Metabolism	heparanase-like	degrade polymeric heparan sulfate molecules into shorter chain length oligosaccharides	Tribolium castaneum	1810	gi|642918767|ref|XP_008191575.1|PREDICTED: heparanase-like isoform X2 [Tribolium castaneum] >gi|1004400378|gb|KYB27768.1| Heparanase-like Protein [Tribolium castaneum]	XP_008191575	1.63971e-159	68	480.715	486
contig_2215_75.80	75.8	Defense/Immune Response	thioredoxin domain-containing protein 15		Tribolium castaneum	1030	gi|91089613|ref|XP_973169.1|PREDICTED: thioredoxin domain-containing protein 15 [Tribolium castaneum] >gi|270011363|gb|EFA07811.1| Thioredoxin domain-containing protein 15-like Protein [Tribolium castaneum]	XP_973169	8.07839e-97	74	300.442	255
contig_22347_16.49	16.49	UNKN	acidic repeat-containing isoform x5		Acyrthosiphon pisum	1463	gi|641666084|ref|XP_008183608.1|PREDICTED: acidic repeat-containing protein-like isoform X5 [Acyrthosiphon pisum]	XP_008183608	1.50727e-16	93	93.2041	64
contig_22496_8.34	8.34	Defense/Immune Response	probable leucine--trna mitochondrial		Acyrthosiphon pisum	318	gi|328702417|ref|XP_003241894.1|PREDICTED: probable leucine--tRNA ligase, mitochondrial [Acyrthosiphon pisum]	XP_003241894	1.44786e-27	86	117.087	67
contig_22514_244.96	244.96	Defense/Immune Response	spatzle 7	The activated form, spaetzle C-106, acts as a ligand for the Toll receptor	Tribolium castaneum	736	gi|1004402878|gb|KYB29242.1|hypothetical protein TcasGA2_TC032150 [Tribolium castaneum]	KYB29242	2.24135e-12	44	73.1738	205
contig_22561_12.93	12.93	UNKN	PREDICTED: uncharacterized protein LOC100159805 isoform X2		Acyrthosiphon pisum	1604	gi|328705547|ref|XP_001950870.2|PREDICTED: uncharacterized protein LOC100159805 isoform X2 [Acyrthosiphon pisum]	XP_001950870	5.96675e-125	76	390.193	385
contig_22686_182.62	182.62	Fatty Acid & Lipid Metabolism	protein canopy 4	regulation of low-density lipoprotein particle clearance	Tribolium castaneum	895	gi|91089541|ref|XP_971419.1|PREDICTED: protein canopy 4 [Tribolium castaneum] >gi|270012595|gb|EFA09043.1| Protein canopy 4-like Protein [Tribolium castaneum]	XP_971419	1.23566e-81	94	258.07	159
contig_22722_68.81	68.81	Structural	stromal interaction molecule homolog isoform x3		Tribolium castaneum	1280	gi|642920007|ref|XP_975159.2|PREDICTED: stromal interaction molecule homolog isoform X2 [Tribolium castaneum] >gi|270005983|gb|EFA02431.1| Stromal interaction molecule homolog-like Protein [Tribolium castaneum]	XP_975159	1.80528e-96	80	315.079	252
contig_22745_119.94	119.94	UNKN	hypothetical protein TRIATDRAFT_301270		Trichoderma atroviride IMI 206040	713	gi|927391603|ref|XP_013941647.1|hypothetical protein TRIATDRAFT_301270 [Trichoderma atroviride IMI 206040] >gi|358394059|gb|EHK43460.1| hypothetical protein TRIATDRAFT_301270 [Trichoderma atroviride IMI 206040]	XP_013941647	2.84414e-10	62	65.0846	64
contig_22906_53.12	53.12	Defense/Immune Response	thioredoxin		Scylla paramamosain	433	gi|414073166|gb|AFW97641.1|thioredoxin [Scylla paramamosain]	AFW97641	9.42811e-10	64	63.1586	68
contig_2296_432.99	432.99	Proteolysis	leukocyte elastase inhibitor	eukocyte elastase (HLE) is a serine protease	Tribolium castaneum	2601	gi|91080459|ref|XP_969900.1|PREDICTED: serpin B12 [Tribolium castaneum] >gi|642919232|ref|XP_008191787.1| PREDICTED: serpin B12 [Tribolium castaneum] >gi|1004400501|gb|EFA02869.2| serpin peptidase inhibitor 26 [Tribolium castaneum]	XP_969900	0	74	568.155	574
contig_23156_33.31	33.31	Fatty Acid & Lipid Metabolism	prostatic acid phosphatase-like		Cryptolaemus montrouzieri	1323	gi|972974383|gb|ALW95355.1|acid phosphatase, partial [Cryptolaemus montrouzieri]	ALW95355	2.33012e-101	63	318.931	341
contig_23348_34.19	34.19	UNKN	dna rna-binding protein kin17		Tribolium castaneum	1331	gi|91078478|ref|XP_968343.1|PREDICTED: DNA/RNA-binding protein KIN17 [Tribolium castaneum] >gi|1004402179|gb|KYB28824.1| DNA/RNA-binding protein KIN17-like Protein [Tribolium castaneum]	XP_968343	1.68319e-158	84	466.463	371
contig_23398_170.29	170.29	UNKN	er membrane protein complex subunit 10		Tribolium castaneum	1161	gi|91076710|ref|XP_972261.1|PREDICTED: ER membrane protein complex subunit 10 [Tribolium castaneum] >gi|270001865|gb|EEZ98312.1| ER membrane protein complex subunit 10-like Protein [Tribolium castaneum]	XP_972261	1.41159e-79	74	256.914	219
contig_2357_220.11	220.11	Development	protein yellow		Tribolium castaneum	3009	gi|269995909|ref|NP_001161777.1|yellow-b precursor [Tribolium castaneum] >gi|642932885|ref|XP_008197172.1| PREDICTED: yellow-b isoform X1 [Tribolium castaneum]	NP_001161777	1.57095e-154	71	477.248	417
contig_2361_268.22	268.22	Cell Cycle & Processes	trans-golgi network integral membrane protein 2	may play a role in exocytic vesicle formation	Tribolium castaneum	1774	gi|1004402835|gb|KYB29217.1|hypothetical protein TcasGA2_TC001022 [Tribolium castaneum]	KYB29217	9.53001e-42	47	167.162	422
contig_23660_53.84	53.84	Heat Shock/Stess Response	nucleotide exchange factor sil1	protein folding	Tribolium castaneum	1350	gi|642933929|ref|XP_008197571.1|PREDICTED: nucleotide exchange factor SIL1 [Tribolium castaneum] >gi|1004396399|gb|EFA10120.2| Nucleotide exchange factor SIL1-like Protein [Tribolium castaneum]	XP_008197571	5.27222e-90	66	291.582	374
contig_23719_34.70	34.7	Sensory Response	neurofilament heavy polypeptide-like		Acyrthosiphon pisum	1780	gi|193695227|ref|XP_001948954.1|PREDICTED: neurofilament heavy polypeptide-like [Acyrthosiphon pisum]	XP_001948954	8.34125e-138	84	421.009	440
contig_23769_28.48	28.48	Transport	epididymal secretory protein e1-like	Intracellular cholesterol transporter which acts in concert with NPC1 and plays an important role in the egress of cholesterol from the endosomal/lysosomal compartment. Both NPC1 and NPC2 function as the cellular 'tag team duo' (TTD) to catalyze the mobilization of cholesterol within the multivesicular environment of the late endosome (LE) to effect egress through the limiting bilayer of the LE. …	Anopheles gambiae str. PEST	578	gi|31199277|ref|XP_308586.1|AGAP007197-PA [Anopheles gambiae str. PEST] >gi|21292103|gb|EAA04248.1| AGAP007197-PA [Anopheles gambiae str. PEST]	XP_308586	3.4651e-29	63	117.472	127
contig_23878_15.14	15.14	Proteolysis	retinoid-inducible serine carboxypeptidase-like		Tribolium castaneum	1407	gi|270001780|gb|EEZ98227.1|Retinoid-inducible serine carboxypeptidase-like Protein [Tribolium castaneum]	EEZ98227	5.57013e-168	71	493.041	419
contig_2389_61.59	61.59	Fatty Acid & Lipid Metabolism	apolipoprotein d		Dendroctonus ponderosae	1399	gi|478255042|gb|ENN75274.1|hypothetical protein YQE_08190, partial [Dendroctonus ponderosae] >gi|546673330|gb|ERL84958.1| hypothetical protein D910_02381 [Dendroctonus ponderosae]	ENN75274	1.3898e-103	83	320.857	204
contig_2425_9.02	9.02	UNKN	daz-associated protein 2-like		Dendroctonus ponderosae	513	gi|332376997|gb|AEE63638.1|unknown [Dendroctonus ponderosae]	AEE63638	1.66455e-06	85	55.4546	34
contig_2434_98.86	98.86	Signal Tranduction	cytokine receptor		Tribolium castaneum	4676	gi|189242442|ref|XP_001807060.1|PREDICTED: cytokine receptor [Tribolium castaneum] >gi|270016376|gb|EFA12822.1| domeless [Tribolium castaneum]	XP_001807060	0	59	752.666	1082
contig_24481_50.21	50.21	UNKN	uncharacterized protein LOC100164630 precursor		Acyrthosiphon pisum	554	gi|253735767|ref|NP_001155634.2|uncharacterized protein LOC100164630 precursor [Acyrthosiphon pisum] >gi|239799330|dbj|BAH70591.1| ACYPI005624 [Acyrthosiphon pisum]	NP_001155634	2.88327e-06	60	53.5286	100
contig_24613_21.09	21.09	Proteolysis	gamma-interferon-inducible lysosomal thiol reductase-like	his enzyme has an important role in MHC class II-restricted antigen processing	Diuraphis noxia	1519	gi|985403272|ref|XP_015369445.1|PREDICTED: uncharacterized protein LOC107165627 [Diuraphis noxia]	XP_015369445	1.60264e-114	75	353.599	307
contig_24875_51.59	51.59	Signal Tranduction	g-protein coupled receptor mth2-like		Dastarcus helophoroides	1410	gi|734521790|gb|AJA06112.1|G-protein coupled receptor Mth-like protein 2 [Dastarcus helophoroides]	AJA06112	9.75387e-74	63	250.366	384
contig_2489_849.86	849.86	Proteolysis	aminopeptidase 1-like protein		Tribolium castaneum	2278	gi|91091078|ref|XP_975801.1|PREDICTED: uncharacterized protein LOC655733 [Tribolium castaneum] >gi|270013149|gb|EFA09597.1| hypothetical protein TcasGA2_TC011716 [Tribolium castaneum]	XP_975801	8.48296e-36	57	146.747	202
contig_2496_1.728.30	1728.3	Fatty Acid & Lipid Metabolism	apolipoprotein d-like		Plutella xylostella	768	gi|768426250|ref|XP_011554163.1|PREDICTED: apolipoprotein D-like [Plutella xylostella]	XP_011554163	3.50868e-20	47	95.9005	198
contig_25_19.681.58	19681.6	Defense/Immune Response	pathogenesis-related protein 5		Tribolium castaneum	1462	gi|91077370|ref|XP_975175.1|PREDICTED: pathogenesis-related protein 5 [Tribolium castaneum] >gi|270001655|gb|EEZ98102.1| Pathogenesis-related protein 5-like Protein [Tribolium castaneum]	XP_975175	1.43061e-102	79	319.701	220
contig_25023_9.16	9.16	UNKN	hypothetical protein OCBIM_22027525mg		Octopus bimaculoides	648	gi|918309888|gb|KOF80706.1|hypothetical protein OCBIM_22027525mg [Octopus bimaculoides]	KOF80706	2.12895e-05	58	54.6842	70
contig_25085_29.21	29.21	Defense/Immune Response	beta- -glucan-binding		Tribolium castaneum	1397	gi|282847471|ref|NP_001164284.1|Gram-negative bacteria binding protein 2 precursor [Tribolium castaneum] >gi|270015143|gb|EFA11591.1| Gram-negative bacteria binding protein 2 [Tribolium castaneum]	NP_001164284	2.36605e-108	62	340.887	439
contig_25099_9.48	9.48	Proteolysis	decaprenyl-diphosphate synthase subunit 2	is unique and responsible for ubiquinone biosynthesis	Diuraphis noxia	321	gi|985421967|ref|XP_015376395.1|PREDICTED: decaprenyl-diphosphate synthase subunit 2-like, partial [Diuraphis noxia]	XP_015376395	4.06606e-69	100	219.55	107
contig_251_329.61	329.61	Transport	niemann-pick c1 protein isoform x2	cholesterol transporter	Tribolium castaneum	4465	gi|642938455|ref|XP_008199810.1|PREDICTED: Niemann-Pick C1 protein isoform X3 [Tribolium castaneum]	XP_008199810	0	78	1675.6	1338
contig_2511_186.14	186.14	Proteolysis	antichymotrypsin-2 isoform x2		Tribolium castaneum	1357	gi|1008449305|ref|XP_015838237.1|PREDICTED: antichymotrypsin-2 isoform X6 [Tribolium castaneum]	XP_015838237	4.27385e-70	60	239.58	374
contig_25372_21.73	21.73	DNA Replication & Repair	rna-directed dna polymerase from transposon bs		Papilio xuthus	1887	gi|930663005|gb|KPJ04628.1|putative RNA-directed DNA polymerase from transposon BS [Papilio xuthus]	KPJ04628	1.27646e-13	57	74.7146	87
contig_2578_75.23	75.23	UNKN	agap003573-pa-like protein		Tribolium castaneum	869	gi|1008439662|ref|XP_015835604.1|PREDICTED: uncharacterized protein LOC103312896 [Tribolium castaneum]	XP_015835604	3.68843e-20	52	97.8265	179
contig_2593_1.084.07	1084.07	Other	glutaminyl-peptide cyclotransferase-like	his gene encodes human pituitary glutaminyl cyclase, which is responsible for the presence of pyroglutamyl residues in many neuroendocrine peptides	Dendroctonus ponderosae	2851	gi|478257843|gb|ENN77986.1|hypothetical protein YQE_05661, partial [Dendroctonus ponderosae]	ENN77986	3.18472e-86	66	292.352	338
contig_26113_57.14	57.14	RNA Processing	deoxyribonuclease i		Tribolium castaneum	662	gi|1004403116|gb|EEZ98722.2|hypothetical protein TcasGA2_TC001268 [Tribolium castaneum]	EEZ98722	7.68743e-30	55	125.176	207
contig_2626_987.81	987.81	Cell Cycle & Processes	chondroitin proteoglycan 2-like isoform x2	Has roles in meiotic chromosome segregation	Plutella xylostella	953	gi|24637972|gb|AAN63949.1|peritrophic matrix insect intestinal mucin [Plutella xylostella]	AAN63949	1.29415e-13	50	82.0333	128
contig_26352_7.57	7.57	Cell Cycle & Processes	spondin-1-like isoform x2	secreted by cells of the floor plate and may be involved in axon guidance	Aedes aegypti	754	gi|157117142|ref|XP_001652955.1|AAEL007889-PA [Aedes aegypti] >gi|108876156|gb|EAT40381.1| AAEL007889-PA [Aedes aegypti]	XP_001652955	3.0988e-55	64	201.06	203
contig_26356_13.31	13.31	OX-REDOX	l-ascorbate oxidase homolog	this enzyme belongs to the family of oxidoreductases	Eucalyptus grandis	470	gi|702486410|ref|XP_010034522.1|PREDICTED: L-ascorbate oxidase homolog [Eucalyptus grandis] >gi|629085943|gb|KCW52300.1| hypothetical protein EUGRSUZ_J01720 [Eucalyptus grandis]	XP_010034522	1.57618e-32	96	131.339	83
contig_2663_152.02	152.02	Structural	peritrophic matrix protein 5-a precursor		Tribolium castaneum	781	gi|649572317|ref|NP_001280544.1|peritrophic matrix protein 5-A precursor [Tribolium castaneum] >gi|268309040|gb|ACY95486.1| peritrophic matrix protein 5-A [Tribolium castaneum] >gi|270003974|gb|EFA00422.1| hypothetical protein TcasGA2_TC003273 [Tribolium castaneum]	NP_001280544	1.39079e-11	44	73.559	125
contig_2690_23.33	23.33	UNKN	hypothetical protein ALC56_13191, partial		Trachymyrmex septentrionalis	524	gi|1009413435|gb|KYN32334.1|hypothetical protein ALC56_13191, partial [Trachymyrmex septentrionalis]	KYN32334	1.1628e-10	78	65.0846	46
contig_27292_19.82	19.82	Translation	translocon-associated protein subunit delta		Coptotermes formosanus	655	gi|506968747|gb|AGM32717.1|translocon-associated protein subunit delta-like (TRAP-delta) [Coptotermes formosanus]	AGM32717	7.62227e-38	72	141.354	140
contig_27307_5.38	5.38	Na/K-ATPase	protein tweety isoform x1		Diuraphis noxia	300	gi|985387582|ref|XP_015375650.1|PREDICTED: protein tweety isoform X2 [Diuraphis noxia] >gi|985387584|ref|XP_015375658.1| PREDICTED: protein tweety isoform X2 [Diuraphis noxia]	XP_015375650	1.21246e-49	100	175.252	83
contig_27426_92.77	92.77	Defense/Immune Response	sodium channel protein 60e-like protein		Tribolium castaneum	1202	gi|1008446881|ref|XP_008196012.2|PREDICTED: leucine-rich repeat-containing protein 70-like [Tribolium castaneum]	XP_008196012	6.30948e-96	66	303.908	323
contig_28017_54.63	54.63	UNKN	PREDICTED: uncharacterized protein LOC659832 isoform X1		Tribolium castaneum	1220	gi|91082667|ref|XP_966596.1|PREDICTED: uncharacterized protein LOC659832 isoform X1 [Tribolium castaneum] >gi|270014970|gb|EFA11418.1| hypothetical protein TcasGA2_TC013595 [Tribolium castaneum]	XP_966596	1.52216e-71	69	238.039	278
contig_28139_15.00	15	Fatty Acid & Lipid Metabolism	glucosylceramidase-like isoform x2	This enzyme participates in sphingolipid metabolism and degradation of glycan structures	Tribolium castaneum	997	gi|91087387|ref|XP_975653.1|PREDICTED: glucosylceramidase-like [Tribolium castaneum] >gi|1004397873|gb|KYB26348.1| hypothetical protein TcasGA2_TC035050 [Tribolium castaneum]	XP_975653	2.32392e-110	69	343.199	301
contig_28346_31.25	31.25	Proteolysis	serine protease inhibitor dipetalogastin		Tribolium castaneum	1872	gi|1008446422|ref|XP_975339.3|PREDICTED: serine protease inhibitor dipetalogastin [Tribolium castaneum] >gi|1004397981|gb|EFA06028.2| Agrin-like Protein [Tribolium castaneum]	XP_975339	0	87	806.979	518
contig_28366_8.91	8.91	UNKN	agap005942-pa-like protein		Anopheles sinensis	547	gi|668459343|gb|KFB47140.1|AGAP005942-PA-like protein [Anopheles sinensis]	KFB47140	1.44256e-17	54	88.1965	117
contig_28564_20.50	20.5	Defense/Immune Response	leucine-rich repeat transmembrane neuronal protein partial		Tribolium castaneum	1186	gi|91081383|ref|XP_972269.1|PREDICTED: leucine-rich repeat-containing protein 15 [Tribolium castaneum] >gi|270006117|gb|EFA02565.1| Chaoptin-like Protein [Tribolium castaneum]	XP_972269	1.10814e-84	68	275.018	316
contig_2858_952.77	952.77	UNKN	PREDICTED: uncharacterized protein LOC103312896		Tribolium castaneum	943	gi|1008439662|ref|XP_015835604.1|PREDICTED: uncharacterized protein LOC103312896 [Tribolium castaneum]	XP_015835604	1.49072e-21	51	102.449	198
contig_287_204.33	204.33	Fatty Acid & Lipid Metabolism	pancreatic lipase-related protein 3-like		Tribolium castaneum	1415	gi|642928332|ref|XP_008195538.1|PREDICTED: phospholipase A1 2 [Tribolium castaneum] >gi|270010341|gb|EFA06789.1| Vitellogenin-2-like Protein [Tribolium castaneum]	XP_008195538	1.47611e-49	53	184.496	294
contig_28736_40.90	40.9	UNKN	heavy subunit		Bemisia tabaci	1019	gi|428230822|gb|AFY99034.1|ferritin [Bemisia tabaci]	AFY99034	3.53161e-56	63	194.512	227
contig_28755_36.76	36.76	UNKN	PREDICTED: uncharacterized protein LOC100570509		Acyrthosiphon pisum	679	gi|328725445|ref|XP_003248481.1|PREDICTED: uncharacterized protein LOC100570509 [Acyrthosiphon pisum] >gi|641680551|ref|XP_008189069.1| PREDICTED: uncharacterized protein LOC100570509 [Acyrthosiphon pisum]	XP_003248481	6.36527e-11	50	68.9366	153
contig_288_8.393.66	8393.66	detoxification	venom allergen 3		Dendroctonus ponderosae	918	gi|478253524|gb|ENN73843.1|hypothetical protein YQE_09558, partial [Dendroctonus ponderosae] >gi|478260454|gb|ENN80178.1| hypothetical protein YQE_03392, partial [Dendroctonus ponderosae]	ENN73843	3.27609e-47	62	169.474	189
contig_28892_15.08	15.08	UNKN	hypothetical protein RO3G_04571		Rhizopus delemar RA 99-880	322	gi|384487686|gb|EIE79866.1|hypothetical protein RO3G_04571 [Rhizopus delemar RA 99-880]	EIE79866	4.01177e-45	97	159.844	82
contig_29049_18.24	18.24	UNKN	tyrosine-protein kinase wsck		Tribolium castaneum	1774	gi|91082551|ref|XP_973940.1|PREDICTED: putative tyrosine-protein kinase Wsck [Tribolium castaneum] >gi|642922810|ref|XP_008193334.1| PREDICTED: putative tyrosine-protein kinase Wsck [Tribolium castaneum] >gi|270007563|gb|EFA04011.1| Putative tyrosine-protein kinase Wsck-like Protein [Tribolium castaneum]	XP_973940	4.7339e-106	61	347.821	527
contig_29132_15.36	15.36	Structural	cytoplasmic dynein 1 intermediate chain	acts as a motor for the intracellular retrograde motility of vesicles and organelles along microtubules	Atta cephalotes	615	gi|801379898|ref|XP_012054133.1|PREDICTED: cytoplasmic dynein 1 intermediate chain-like [Atta cephalotes]	XP_012054133	3.64071e-29	78	125.176	116
contig_29163_35.83	35.83	UNKN	PREDICTED: uncharacterized protein LOC100166545		Acyrthosiphon pisum	860	gi|193702374|ref|XP_001951405.1|PREDICTED: uncharacterized protein LOC100166545 [Acyrthosiphon pisum]	XP_001951405	2.18154e-82	83	259.225	185
contig_29180_88.50	88.5	UNKN	PREDICTED: uncharacterized protein LOC103524398		Diaphorina citri	774	gi|662187959|ref|XP_008487632.1|PREDICTED: uncharacterized protein LOC103524398 [Diaphorina citri]	XP_008487632	3.13252e-05	59	52.373	74
contig_29558_6.89	6.89	Transport	excitatory amino acid transporter 3		Diuraphis noxia	538	gi|985399795|ref|XP_015367536.1|PREDICTED: excitatory amino acid transporter 1 isoform X2 [Diuraphis noxia]	XP_015367536	7.03581e-119	99	357.836	179
contig_29612_71.19	71.19	UNKN	sortilin-related receptor-like	Likely to be a multifunctional endocytic receptor, that may be implicated in the uptake of lipoproteins and of proteases	Dendroctonus ponderosae	378	gi|478254082|gb|ENN74370.1|hypothetical protein YQE_09027, partial [Dendroctonus ponderosae]	ENN74370	2.54489e-09	57	65.4698	96
contig_29624_53.15	53.15	Fatty Acid & Lipid Metabolism	lipase 3-like		Tribolium castaneum	1516	gi|189236687|ref|XP_973103.2|PREDICTED: lipase 3-like [Tribolium castaneum] >gi|1004400955|gb|KYB28091.1| Lipase 3-like Protein [Tribolium castaneum]	XP_973103	6.75161e-132	67	401.364	370
contig_298_3.680.31	3680.31	Signal Tranduction	g-protein coupled receptor mth2 isoform x1		Tribolium castaneum	3232	gi|1008456219|ref|XP_015840171.1|PREDICTED: G-protein coupled receptor Mth2 isoform X2 [Tribolium castaneum]	XP_015840171	2.95954e-122	62	397.512	518
contig_2988_52.36	52.36	UNKN	PREDICTED: uncharacterized protein LOC103313584		Tribolium castaneum	605	gi|642913362|ref|XP_008195422.1|PREDICTED: uncharacterized protein LOC103313584 [Tribolium castaneum] >gi|1004402769|gb|KYB29179.1| hypothetical protein TcasGA2_TC034553 [Tribolium castaneum]	XP_008195422	7.02404e-18	62	87.0409	106
contig_3002_415.97	415.97	Defense/Immune Response	beta- -glucan-binding		Tenebrio molitor	1575	gi|170321837|dbj|BAG14263.1|GNBP1 [Tenebrio molitor]	BAG14263	8.14982e-128	65	393.275	446
contig_3023_330.43	330.43	Defense/Immune Response	slit-like 3 protein	A major identifying feature of the Slit protein is the four leucine-rich repeat (LRR) domains . main function of Slit proteins is to act as midline repellents, preventing the crossing of longitudinal axons through the midline of the central nervous system of most bilaterian animal species	Tribolium castaneum	2265	gi|91077736|ref|XP_975147.1|PREDICTED: chondroadherin [Tribolium castaneum] >gi|270001521|gb|EEZ97968.1| Chondroadherin-like Protein [Tribolium castaneum]	XP_975147	1.3154e-78	58	272.322	462
contig_30238_157.34	157.34	Fatty Acid & Lipid Metabolism	apolipoprotein d-like		Acromyrmex echinatior	656	gi|332026341|gb|EGI66470.1|Apolipoprotein D [Acromyrmex echinatior]	EGI66470	5.58299e-43	57	155.606	188
contig_3060_1.341.35	1341.35	Proteolysis	lysosomal acid phosphatase		Cryptolaemus montrouzieri	1526	gi|972974383|gb|ALW95355.1|acid phosphatase, partial [Cryptolaemus montrouzieri]	ALW95355	3.32912e-57	54	206.068	358
contig_30606_29.64	29.64	UNKN	hypothetical protein TcasGA2_TC006686		Tribolium castaneum	2301	gi|270012531|gb|EFA08979.1|hypothetical protein TcasGA2_TC006686 [Tribolium castaneum]	EFA08979	1.37468e-106	68	345.125	399
contig_31047_36.48	36.48	DNA Replication & Repair	protein flightless-1	May play a role as coactivator in transcriptional activation by hormone-activated nuclear receptors (NR)	Tribolium castaneum	3168	gi|91092168|ref|XP_968081.1|PREDICTED: protein windpipe [Tribolium castaneum] >gi|270014443|gb|EFA10891.1| hypothetical protein TcasGA2_TC001715 [Tribolium castaneum]	XP_968081	1.32433e-32	54	144.436	309
contig_312_153.89	153.89	Cell Cycle & Processes	neuroglian isoform x2		Dendroctonus ponderosae	6483	gi|546685142|gb|ERL94669.1|hypothetical protein D910_11944 [Dendroctonus ponderosae]	ERL94669	0	83	1828.53	1225
contig_31238_24.47	24.47	Fatty Acid & Lipid Metabolism	fatty acid-binding muscle isoform x1		Trichogramma pretiosum	1245	gi|936685023|ref|XP_014220478.1|PREDICTED: fatty acid-binding protein, muscle isoform X1 [Trichogramma pretiosum]	XP_014220478	1.27733e-46	80	168.318	127
contig_31281_9.25	9.25	Heat Shock/Stess Response	peptidyl-prolyl cis-trans isomerase	an enzyme that accelerates protein folding by catalyzing the cis-trans isomerization	Capsaspora owczarzaki	354	gi|470299984|ref|XP_004346771.1|cyclophilin-type peptidylprolyl cis-trans isomerase [Capsaspora owczarzaki ATCC 30864] >gi|765553826|gb|KJE94447.1| cyclophilin-type peptidylprolyl cis-trans isomerase [Capsaspora owczarzaki ATCC 30864]	XP_004346771	4.92435e-10	60	64.3142	89
contig_31323_36.88	36.88	UNKN	uncharacterized protein LOC100164166 precursor		Acyrthosiphon pisum	832	gi|240849061|ref|NP_001155611.1|uncharacterized protein LOC100164166 precursor [Acyrthosiphon pisum] >gi|239790570|dbj|BAH71838.1| ACYPI005203 [Acyrthosiphon pisum]	NP_001155611	2.31579e-55	80	189.119	186
contig_31346_97.71	97.71	detoxification	selenoprotein m-like	well-characterized antioxidant activity	Dinoponera quadriceps	1860	gi|951547883|ref|XP_014474090.1|PREDICTED: selenoprotein M-like [Dinoponera quadriceps]	XP_014474090	7.86786e-24	69	108.227	104
contig_31422_24.11	24.11	Fatty Acid & Lipid Metabolism	rare lipoprotein a		Cystobacter fuscus	584	gi|488704359|ref|WP_002628331.1|hypothetical protein [Cystobacter fuscus] >gi|528050923|gb|EPX55772.1| Rare lipoprotein A [Cystobacter fuscus DSM 2262]	WP_002628331	4.90687e-24	68	103.219	92
contig_315_1.448.59	1448.59	Proteolysis	serine protease inhibitor 3 4 isoform x14		Tribolium castaneum	2931	gi|642938992|ref|XP_008200107.1|PREDICTED: serine protease inhibitor 3/4 isoform X5 [Tribolium castaneum]	XP_008200107	1.08437e-132	74	419.468	395
contig_31827_30.86	30.86	UNKN	PREDICTED: uncharacterized protein LOC100570895		Acyrthosiphon pisum	450	gi|328714744|ref|XP_003245441.1|PREDICTED: uncharacterized protein LOC100570895 [Acyrthosiphon pisum]	XP_003245441	2.8162e-08	75	59.3066	45
contig_31864_122.69	122.69	UNKN	uncharacterized protein LOC100165393 precursor		Acyrthosiphon pisum	671	gi|240849625|ref|NP_001155659.1|uncharacterized protein LOC100165393 precursor [Acyrthosiphon pisum] >gi|239790740|dbj|BAH71912.1| ACYPI006346 [Acyrthosiphon pisum]	NP_001155659	1.64253e-47	72	165.236	143
contig_32304_236.16	236.16	Defense/Immune Response	15 kda selenoprotein	Among functionally characterized selenoproteins are five glutathione peroxidases (GPX) and three thioredoxin reductases	Tribolium castaneum	734	gi|91078330|ref|XP_973321.1|PREDICTED: 15 kDa selenoprotein [Tribolium castaneum] >gi|270003970|gb|EFA00418.1| 15 kDa selenoprotein-like Protein [Tribolium castaneum]	XP_973321	3.75047e-79	82	248.054	162
contig_324_83.58	83.58	Defense/Immune Response	insulin-like growth factor-binding protein complex acid labile subunit		Takifugu rubripes	2036	gi|410921668|ref|XP_003974305.1|PREDICTED: leucine-rich repeat-containing protein 15-like [Takifugu rubripes]	XP_003974305	8.02355e-23	46	113.62	294
contig_3292_444.11	444.11	UNKN	reticulocalbin-2		Tribolium castaneum	1501	gi|91082161|ref|XP_970591.1|PREDICTED: reticulocalbin-2 [Tribolium castaneum] >gi|270007433|gb|EFA03881.1| Reticulocalbin-2-like Protein [Tribolium castaneum]	XP_970591	4.82498e-133	78	401.364	319
contig_33206_15.50	15.5	Development	synaptotagmin partial		Limulus polyphemus	977	gi|926626856|ref|XP_013778982.1|PREDICTED: synaptotagmin-7-like [Limulus polyphemus]	XP_013778982	1.14697e-07	45	63.1586	205
contig_33248_43.45	43.45	RNA Processing	trna (adenine -n )-methyltransferase catalytic subunit trmt61a		Tribolium castaneum	1640	gi|91077428|ref|XP_975436.1|PREDICTED: tRNA (adenine(58)-N(1))-methyltransferase catalytic subunit TRMT61A [Tribolium castaneum] >gi|270001628|gb|EEZ98075.1| tRNA (adenine(58)-N(1))-methyltransferase catalytic subunit TRMT61A-like Protein [Tribolium castaneum]	XP_975436	4.02845e-140	78	421.009	308
contig_33373_45.11	45.11	Metabolism	urease accessory		Diuraphis noxia	424	gi|985408969|ref|XP_015369859.1|PREDICTED: urease accessory protein UreE-like [Diuraphis noxia]	XP_015369859	1.07103e-12	61	70.4774	77
contig_335_402.84	402.84	UNKN	somatomedin-b and thrombospondin type-1 domain-containing	Somatomedin B is a serum factor of unknown function	Tribolium castaneum	2954	gi|91084829|ref|XP_973635.1|PREDICTED: somatomedin-B and thrombospondin type-1 domain-containing protein [Tribolium castaneum] >gi|1004399118|gb|KYB27054.1| Somatomedin-B and thrombospondin type-1 domain-containing protein-like protein [Tribolium castaneum]	XP_973635	8.95601e-150	88	458.373	278
contig_33616_89.30	89.3	Proteolysis	osteopetrosis-associated transmembrane protein 1	This gene encodes a protein that may be involved in the degradation of G proteins via the ubiquitin-dependent proteasome pathway	Tribolium castaneum	442	gi|642921708|ref|XP_008194760.1|PREDICTED: osteopetrosis-associated transmembrane protein 1 isoform X2 [Tribolium castaneum]	XP_008194760	3.10319e-19	63	88.5817	92
contig_33665_10.28	10.28	Nucleotide Metabolism	sphingomyelin phosphodiesterase		Tribolium castaneum	842	gi|1004397310|gb|KYB25998.1|Sphingomyelin phosphodiesterase-like Protein [Tribolium castaneum]	KYB25998	4.57911e-81	80	269.626	192
contig_33677_9.38	9.38	UNKN	adenylyl cyclase-associated protein 2	function of the protein encoded by this gene is unknow	Leptosomus discolor	310	gi|700415273|ref|XP_009945549.1|PREDICTED: adenylyl cyclase-associated protein 2 [Leptosomus discolor]	XP_009945549	4.54132e-08	53	60.077	99
contig_33738_47.58	47.58	Development	fasciclin-3 isoform x2		Tribolium castaneum	1219	gi|1008443024|ref|XP_015836531.1|PREDICTED: fasciclin-3 isoform X1 [Tribolium castaneum]	XP_015836531	6.10747e-16	60	89.7373	128
contig_33941_9.25	9.25	UNKN	PREDICTED: uncharacterized protein LOC103314647 isoform X1		Tribolium castaneum	718	gi|642911317|ref|XP_008199368.1|PREDICTED: uncharacterized protein LOC103314647 isoform X1 [Tribolium castaneum] >gi|1004403801|gb|EFA11277.2| hypothetical protein TcasGA2_TC010812 [Tribolium castaneum]	XP_008199368	1.34805e-20	73	95.9005	100
contig_344_1.245.32	1245.32	detoxification	integument esterase	The described esterases are an important detoxification mechanism in B. microplus ticks at the integument	Tribolium castaneum	3391	gi|189239947|ref|XP_001814500.1|PREDICTED: esterase FE4 [Tribolium castaneum] >gi|270012138|gb|EFA08586.1| Esterase-6-like Protein [Tribolium castaneum]	XP_001814500	0	75	609.372	530
contig_3465_640.64	640.64	Cell Cycle & Processes	chondroitin proteoglycan-2-like		Ciona intestinalis	795	gi|699254872|ref|XP_009861538.1|PREDICTED: chondroitin proteoglycan-2-like [Ciona intestinalis]	XP_009861538	2.97794e-20	44	98.2117	197
contig_34731_27.10	27.1	Proteolysis	serine protease		Tribolium castaneum	1420	gi|91078858|ref|XP_972061.1|PREDICTED: putative serine protease K12H4.7 [Tribolium castaneum] >gi|1004401845|gb|EFA00580.2| Putative serine protease K12H4.7-like Protein [Tribolium castaneum]	XP_972061	0	79	643.654	475
contig_34827_29.09	29.09	Sensory Response	esterase-6-like protein		Cryptolaemus montrouzieri	1752	gi|972974442|gb|ALW95357.1|carboxylesterase, partial [Cryptolaemus montrouzieri]	ALW95357	0	72	610.527	523
contig_34857_10.58	10.58	UNKN	protein ralf-like 16		Morus notabilis	342	gi|703129493|ref|XP_010104377.1|hypothetical protein L484_005819 [Morus notabilis] >gi|587912227|gb|EXC00006.1| hypothetical protein L484_005819 [Morus notabilis]	XP_010104377	4.13833e-06	55	52.373	67
contig_35175_14.43	14.43	Na/K-ATPase	sodium-dependent multivitamin transporter		Tribolium castaneum	664	gi|1008439189|ref|XP_015835481.1|PREDICTED: putative sodium-dependent multivitamin transporter [Tribolium castaneum] >gi|1008439191|ref|XP_015835482.1| PREDICTED: putative sodium-dependent multivitamin transporter [Tribolium castaneum] >gi|1008439193|ref|XP_015835483.1| PREDICTED: putative sodium-dependent multivitamin transporter [Tribolium castaneum] >gi|1008439195|ref|XP_015835484.1| PREDICTED…	XP_015835481	3.10234e-63	69	218.394	191
contig_35226_38.34	38.34	Carbohydrate Metabolism	acid partial	Trehalase is a glycoside hydrolase enzyme	Aphis gossypii	891	gi|615814166|gb|AHX71991.1|acid trehalase, partial [Aphis gossypii]	AHX71991	1.431e-136	94	397.897	214
contig_3528_41.84	41.84	Signal Tranduction	vascular endothelial growth factor a-a		Tribolium castaneum	1341	gi|1004400677|gb|KYB27935.1|hypothetical protein TcasGA2_TC007448 [Tribolium castaneum]	KYB27935	2.03309e-75	72	250.751	214
contig_3544_111.24	111.24	UNKN	PREDICTED: uncharacterized protein LOC103313467		Tribolium castaneum	1228	gi|642926791|ref|XP_008195017.1|PREDICTED: uncharacterized protein LOC103313467 [Tribolium castaneum] >gi|1004398887|gb|KYB26925.1| hypothetical protein TcasGA2_TC033459 [Tribolium castaneum]	XP_008195017	5.6159e-36	66	140.969	133
contig_35530_104.37	104.37	UNKN	tail-anchored protein insertion receptor wrb-like		Tribolium castaneum	719	gi|642922166|ref|XP_008193043.1|PREDICTED: tail-anchored protein insertion receptor WRB [Tribolium castaneum]	XP_008193043	3.85355e-31	65	124.405	141
contig_3564_454.22	454.22	Other	sialomucin core protein 24-like	may play a key role in hematopoiesis	Tribolium castaneum	1116	gi|91076480|ref|XP_972460.1|PREDICTED: cell wall protein DAN4 [Tribolium castaneum] >gi|1004403246|gb|EEZ98861.2| hypothetical protein TcasGA2_TC004472 [Tribolium castaneum]	XP_972460	2.13904e-15	97	83.5741	41
contig_35699_9.29	9.29	Proteolysis	e3 ubiquitin-protein ligase rnf19a-like		Diuraphis noxia	484	gi|985394624|ref|XP_015364720.1|PREDICTED: E3 ubiquitin-protein ligase RNF19A-like [Diuraphis noxia]	XP_015364720	7.23157e-13	93	76.2554	64
contig_3572_564.11	564.11	UNKN	PREDICTED: uncharacterized protein LOC103313380		Tribolium castaneum	1062	gi|642925728|ref|XP_008194689.1|PREDICTED: uncharacterized protein LOC103313380 [Tribolium castaneum] >gi|1008442586|ref|XP_015836395.1| PREDICTED: uncharacterized protein LOC103313380 [Tribolium castaneum] >gi|1008442589|ref|XP_015836396.1| PREDICTED: uncharacterized protein LOC103313380 [Tribolium castaneum] >gi|270008641|gb|EFA05089.1| hypothetical protein TcasGA2_TC015187 [Tribolium castaneum]	XP_008194689	2.87021e-08	52	63.1586	192
contig_3583_270.91	270.91	Transport	ileal sodium bile acid cotransporter-like isoform x1		Tribolium castaneum	1819	gi|1008452188|ref|XP_015839041.1|PREDICTED: ileal sodium/bile acid cotransporter isoform X1 [Tribolium castaneum]	XP_015839041	9.94268e-151	76	454.907	428
contig_35904_22.75	22.75	UNKN	secreted salivary peptide precursor		Acyrthosiphon pisum	378	gi|328724533|ref|XP_003248175.1|PREDICTED: uncharacterized protein LOC100573341 [Acyrthosiphon pisum]	XP_003248175	2.8091e-13	84	72.0182	99
contig_35975_5.52	5.52	UNKN	tumor protein d54		Pogonomyrmex barbatus	414	gi|769831065|ref|XP_011634346.1|PREDICTED: tumor protein D54 isoform X3 [Pogonomyrmex barbatus]	XP_011634346	6.54284e-25	71	105.916	97
contig_36015_12.24	12.24	Fatty Acid & Lipid Metabolism	prolipoprotein diacylglyceryl partial		Acyrthosiphon pisum	456	gi|641677351|ref|XP_008187739.1|PREDICTED: uncharacterized protein LOC100571399 isoform X1 [Acyrthosiphon pisum]	XP_008187739	5.91171e-08	88	58.151	34
contig_36175_17.97	17.97	UNKN	protein tyrosine kinase		Guillardia theta	888	gi|551653786|ref|XP_005829670.1|hypothetical protein GUITHDRAFT_73681, partial [Guillardia theta CCMP2712] >gi|428173790|gb|EKX42690.1| hypothetical protein GUITHDRAFT_73681, partial [Guillardia theta CCMP2712]	XP_005829670	8.12691e-13	51	78.1814	185
contig_36189_7.06	7.06	Defense/Immune Response	esterase fe4		Leptinotarsa decemlineata	580	gi|728417299|gb|AIY68339.1|esterase, partial [Leptinotarsa decemlineata]	AIY68339	3.99287e-29	60	112.464	130
contig_3625_316.41	316.41	Proteolysis	lysosomal aspartic protease		Wasmannia auropunctata	1309	gi|780636492|ref|XP_011686795.1|PREDICTED: lysosomal aspartic protease [Wasmannia auropunctata]	XP_011686795	1.50395e-104	64	328.176	365
contig_3641_432.01	432.01	UNKN	PREDICTED: uncharacterized protein LOC107270650		Cephus cinctus	882	gi|1000718796|ref|XP_015601330.1|PREDICTED: uncharacterized protein LOC107270650 [Cephus cinctus]	XP_015601330	3.08518e-11	66	68.5514	81
contig_36490_22.40	22.4	Sensory Response	general odorant-binding protein 83a		Tribolium castaneum	409	gi|270008145|gb|EFA04593.1|odorant binding protein 07 [Tribolium castaneum]	EFA04593	7.09242e-14	71	74.3294	71
contig_36494_22.78	22.78	detoxification	15 kda selenoprotein		Diaphorina citri	480	gi|662216240|ref|XP_008482042.1|PREDICTED: 15 kDa selenoprotein isoform X1 [Diaphorina citri] >gi|662216242|ref|XP_008482043.1| PREDICTED: 15 kDa selenoprotein isoform X2 [Diaphorina citri]	XP_008482042	2.31867e-14	63	77.411	82
contig_3651_812.25	812.25	UNKN	PREDICTED: uncharacterized protein LOC663458		Tribolium castaneum	1159	gi|642927289|ref|XP_008195209.1|PREDICTED: uncharacterized protein LOC663458 [Tribolium castaneum] >gi|642927291|ref|XP_008195210.1| PREDICTED: uncharacterized protein LOC663458 [Tribolium castaneum] >gi|270009991|gb|EFA06439.1| hypothetical protein TcasGA2_TC009321 [Tribolium castaneum]	XP_008195209	6.01287e-35	52	140.969	237
contig_36568_36.22	36.22	Proteolysis	carboxypeptidase n subunit 2-like		Tribolium castaneum	2077	gi|1008455234|ref|XP_008190837.2|PREDICTED: uncharacterized protein LOC655571 [Tribolium castaneum]	XP_008190837	0	83	795.808	603
contig_36749_47.02	47.02	Signal Tranduction	g-protein coupled receptor mth2-like isoform x2		Tribolium castaneum	657	gi|1008456219|ref|XP_015840171.1|PREDICTED: G-protein coupled receptor Mth2 isoform X2 [Tribolium castaneum]	XP_015840171	1.38848e-17	47	91.2781	223
contig_36870_28.55	28.55	Sensory Response	chemosensory protein		Blattella germanica	525	gi|982743609|gb|AMA98182.1|chemosensory protein [Blattella germanica]	AMA98182	1.86938e-11	58	68.5514	97
contig_3704_50.15	50.15	Proteolysis	leukocyte elastase inhibitor	is a serine proteinase in the same family as chymotrypsin	Tribolium castaneum	2038	gi|642910961|ref|XP_008193484.1|PREDICTED: leukocyte elastase inhibitor [Tribolium castaneum] >gi|642910963|ref|XP_008193485.1| PREDICTED: leukocyte elastase inhibitor [Tribolium castaneum] >gi|642910965|ref|XP_008193486.1| PREDICTED: leukocyte elastase inhibitor [Tribolium castaneum] >gi|270015161|gb|EFA11609.1| serpin peptidase inhibitor 30 [Tribolium castaneum]	XP_008193484	4.68065e-109	67	348.591	397
contig_37205_75.19	75.19	UNKN	PREDICTED: uncharacterized protein LOC664222 isoform X2		Tribolium castaneum	1289	gi|642932135|ref|XP_008196869.1|PREDICTED: uncharacterized protein LOC664222 isoform X2 [Tribolium castaneum]	XP_008196869	5.32489e-97	79	304.294	243
contig_37251_50.02	50.02	UNKN	27 kda hemolymph		Tribolium castaneum	721	gi|91090472|ref|XP_968158.1|PREDICTED: uncharacterized protein LOC656540 [Tribolium castaneum] >gi|1004395994|gb|EFA10305.2| hypothetical protein TcasGA2_TC012520 [Tribolium castaneum]	XP_968158	1.94944e-66	73	224.557	199
contig_37649_45.61	45.61	Other	sialomucin core protein 24		Diuraphis noxia	1197	gi|985414527|ref|XP_015372686.1|PREDICTED: integumentary mucin C.1-like [Diuraphis noxia]	XP_015372686	8.81176e-19	100	93.5893	41
contig_37813_37.70	37.7	UNKN	PREDICTED: uncharacterized protein LOC107170646		Diuraphis noxia	1377	gi|985421794|ref|XP_015376296.1|PREDICTED: uncharacterized protein LOC107170646 [Diuraphis noxia]	XP_015376296	1.72975e-40	75	154.066	164
contig_379_3.493.69	3493.69	Signal Tranduction	integrin beta-ps		Tribolium castaneum	2702	gi|642922463|ref|XP_008193182.1|PREDICTED: integrin beta-PS [Tribolium castaneum] >gi|1004400111|gb|EFA03618.2| Integrin beta-PS-like Protein [Tribolium castaneum]	XP_008193182	0	62	625.165	790
contig_38094_29.75	29.75	UNKN	unkown protein		Riptortus pedestris	1416	gi|501289840|dbj|BAN20097.1|unknown secreted protein [Riptortus pedestris]	BAN20097	1.92317e-22	47	106.686	268
contig_3810_549.10	549.1	Signal Tranduction	vascular endothelial growth factor a-a		Tribolium castaneum	1934	gi|91081701|ref|XP_970909.1|PREDICTED: uncharacterized protein LOC659516 [Tribolium castaneum] >gi|642921305|ref|XP_008192810.1| PREDICTED: uncharacterized protein LOC659516 [Tribolium castaneum] >gi|642921307|ref|XP_008192811.1| PREDICTED: uncharacterized protein LOC659516 [Tribolium castaneum] >gi|270006461|gb|EFA02909.1| PDGF- and VEGF-related factor 3 [Tribolium castaneum]	XP_970909	6.56672e-91	63	300.827	376
contig_38222_8.86	8.86	UNKN	PREDICTED: uncharacterized protein LOC103313383		Tribolium castaneum	399	gi|642925935|ref|XP_008194702.1|PREDICTED: uncharacterized protein LOC103313383 [Tribolium castaneum] >gi|270008587|gb|EFA05035.1| hypothetical protein TcasGA2_TC015123 [Tribolium castaneum]	XP_008194702	1.06119e-15	64	78.5666	89
contig_38478_21.26	21.26	Heat Shock/Stess Response	sec14-like protein 2 isoform x1	Transports - temp sensitive HSPs	Polistes canadensis	549	gi|954545326|ref|XP_014615121.1|PREDICTED: SEC14-like protein 2 [Polistes canadensis] >gi|954545328|ref|XP_014615122.1| PREDICTED: SEC14-like protein 2 [Polistes canadensis] >gi|954545330|ref|XP_014615123.1| PREDICTED: SEC14-like protein 2 [Polistes canadensis]	XP_014615121	3.99839e-15	61	82.4185	135
contig_38541_7.86	7.86	UNKN	transmembrane protein 41a-like		Acyrthosiphon pisum	419	gi|240849605|ref|NP_001155725.1|transmembrane protein 41A precursor [Acyrthosiphon pisum] >gi|641658666|ref|XP_008180794.1| PREDICTED: transmembrane protein 41A isoform X1 [Acyrthosiphon pisum] >gi|239792464|dbj|BAH72573.1| ACYPI007761 [Acyrthosiphon pisum]	NP_001155725	2.12808e-13	82	74.7146	51
contig_38760_9.63	9.63	Defense/Immune Response	thiol reductase thioredoxin		Herbidospora daliensis	799	gi|1011537473|ref|WP_062430536.1|thioredoxin [Herbidospora daliensis]	WP_062430536	4.80293e-09	61	62.7734	81
contig_3884_84.09	84.09	UNKN	hypothetical protein YQE_10085, partial		Dendroctonus ponderosae	2774	gi|478252939|gb|ENN73323.1|hypothetical protein YQE_10085, partial [Dendroctonus ponderosae]	ENN73323	0	88	995.342	593
contig_38929_9.03	9.03	UNKN	oxysterol-binding protein 3 isoform x4		Mucor ambiguus	300	gi|758346163|dbj|GAN11187.1|oxysterol-binding protein-related protein 3 isoform X4 [Mucor ambiguus]	GAN11187	4.96816e-15	88	73.1738	35
contig_391_1.203.13	1203.13	Heat Shock/Stess Response	dnaj homolog subfamily c member 25 homolog		Tribolium castaneum	1285	gi|91076686|ref|XP_971385.1|PREDICTED: dnaJ homolog subfamily C member 25 homolog [Tribolium castaneum] >gi|270001878|gb|EEZ98325.1| DnaJ homolog subfamily C member 25 homolog-like Protein [Tribolium castaneum]	XP_971385	1.14903e-129	88	390.193	314
contig_3910_89.20	89.2	Signal Tranduction	vascular endothelial growth factor receptor 1 isoform x1		Tribolium castaneum	5486	gi|642919373|ref|XP_008191844.1|PREDICTED: vascular endothelial growth factor receptor 1 isoform X1 [Tribolium castaneum]	XP_008191844	0	58	837.025	1305
contig_39155_19.06	19.06	UNKN	kdel motif-containing protein 1-like		Tribolium castaneum	809	gi|91081993|ref|XP_969039.1|PREDICTED: KDEL motif-containing protein 1 [Tribolium castaneum]	XP_969039	2.43583e-81	71	265.774	217
contig_3940_104.25	104.25	RNA Processing	poly -specific endoribonuclease homolog		Tribolium castaneum	1421	gi|642930113|ref|XP_008196257.1|PREDICTED: poly(U)-specific endoribonuclease homolog isoform X1 [Tribolium castaneum] >gi|642930115|ref|XP_008196258.1| PREDICTED: poly(U)-specific endoribonuclease homolog isoform X1 [Tribolium castaneum] >gi|642930119|ref|XP_008196260.1| PREDICTED: poly(U)-specific endoribonuclease homolog isoform X1 [Tribolium castaneum] >gi|1004398245|gb|EFA05915.2| Poly(U)-spe…	XP_008196257	3.52371e-124	74	379.022	312
contig_39797_77.30	77.3	Defense/Immune Response	venom peptide -like		Tribolium castaneum	555	gi|642919486|ref|XP_008191890.1|PREDICTED: zonadhesin-like [Tribolium castaneum] >gi|1004400588|gb|KYB27884.1| hypothetical protein TcasGA2_TC032774 [Tribolium castaneum]	XP_008191890	3.34522e-07	45	56.9954	137
contig_40250_76.44	76.44	Other	multiple epidermal growth factor-like domains protein 6		Tribolium castaneum	564	gi|642918338|ref|XP_008196865.1|PREDICTED: protein crumbs [Tribolium castaneum] >gi|270004576|gb|EFA01024.1| hypothetical protein TcasGA2_TC003939 [Tribolium castaneum]	XP_008196865	5.21848e-51	78	172.17	119
contig_40617_21.29	21.29	Defense/Immune Response	defensin 4		Graminella nigrifrons	459	gi|723941665|gb|AIY24634.1|defensin, partial [Graminella nigrifrons]	AIY24634	9.2961e-38	98	136.346	92
contig_4086_1.746.28	1746.28	Proteolysis	cathepsin l-like proteinase		Tribolium castaneum	1240	gi|283046734|ref|NP_001164314.1|cathepsin L precursor [Tribolium castaneum] >gi|270001247|gb|EEZ97694.1| cathepsin L precursor [Tribolium castaneum]	NP_001164314	1.45855e-92	63	294.664	334
contig_40919_10.45	10.45	detoxification	cytochrome c oxidase subunit 4 isoform mitochondrial		Cimex lectularius	357	gi|939247897|ref|XP_014243423.1|PREDICTED: cytochrome c oxidase subunit 4 isoform 1, mitochondrial [Cimex lectularius]	XP_014243423	1.68308e-15	68	78.9518	74
contig_4103_474.55	474.55	detoxification	udp-glucuronosyltransferase 2c1-like		Tribolium castaneum	1905	gi|642939824|ref|XP_008190471.1|PREDICTED: UDP-glucuronosyltransferase 2C1-like [Tribolium castaneum]	XP_008190471	7.07504e-105	59	339.732	463
contig_41141_19.53	19.53	Signal Tranduction	syndecan isoform x1	syndecans are single transmembrane domain proteins that are thought to act as coreceptors, especially for G protein-coupled receptors	Tribolium castaneum	509	gi|642911373|ref|XP_008199397.1|PREDICTED: syndecan [Tribolium castaneum] >gi|1004403781|gb|EFA11584.2| syndecan [Tribolium castaneum]	XP_008199397	5.73914e-26	60	109.383	141
contig_4148_277.93	277.93	Defense/Immune Response	insulin-like growth factor-binding protein complex acid labile subunit		Tribolium castaneum	4708	gi|91088789|ref|XP_968000.1|PREDICTED: insulin-like growth factor-binding protein complex acid labile subunit [Tribolium castaneum] >gi|270011625|gb|EFA08073.1| Chaoptin-like Protein [Tribolium castaneum]	XP_968000	3.90089e-105	69	357.066	491
contig_41926_11.77	11.77	UNKN	PREDICTED: uncharacterized protein LOC100169287		Acyrthosiphon pisum	713	gi|328719628|ref|XP_001944786.2|PREDICTED: uncharacterized protein LOC100169287 [Acyrthosiphon pisum]	XP_001944786	7.09703e-26	71	109.768	130
contig_41955_15.03	15.03	Proteolysis	c-type lysozyme 1		Harmonia axyridis	615	gi|732554597|gb|AIZ72679.1|c-type lysozyme 1 [Harmonia axyridis]	AIZ72679	3.67764e-60	93	197.978	109
contig_42041_5.63	5.63	Metabolism	vacuolar atp synthase subunit s1		Anopheles darlingi	300	gi|568249037|gb|ETN58856.1|vacuolar ATP synthase subunit S1 [Anopheles darlingi]	ETN58856	1.98773e-10	56	66.6254	91
contig_42168_13.25	13.25	UNKN	tetraspanin 29fb	Tetraspanins display numerous properties that indicate their physiological importance in cell adhesion, motility, activation and proliferation, as well as their contribution to pathological conditions such as metastasis or viral infection	Aedes albopictus	324	gi|1000197303|gb|KXJ71418.1|hypothetical protein RP20_CCG020630 [Aedes albopictus]	KXJ71418	5.07753e-17	59	83.9593	102
contig_42262_16.49	16.49	Defense/Immune Response	leucine-rich repeat neuronal protein 3-like		Tribolium castaneum	1145	gi|91084239|ref|XP_966598.1|PREDICTED: leucine-rich repeat neuronal protein 1 [Tribolium castaneum] >gi|270008796|gb|EFA05244.1| Leucine-rich repeat neuronal protein 1-like Protein [Tribolium castaneum]	XP_966598	1.13441e-93	66	301.212	348
contig_4242_247.69	247.69	DNA Replication & Repair	protein creg1	The protein encoded by this gene antagonizes transcriptional activation and cellular transformation by E1A	Tribolium castaneum	1013	gi|91076494|ref|XP_972946.1|PREDICTED: protein CREG1 [Tribolium castaneum] >gi|270002600|gb|EEZ99047.1| Protein CREG1-like Protein [Tribolium castaneum]	XP_972946	8.62077e-74	76	239.58	192
contig_4258_168.31	168.31	RNA Processing	pre-mrna branch site protein p14		Dendroctonus ponderosae	684	gi|478259603|gb|ENN79456.1|hypothetical protein YQE_04100, partial [Dendroctonus ponderosae]	ENN79456	1.06241e-11	44	72.0182	156
contig_42979_41.50	41.5	UNKN	aael005342- partial		Dendroctonus ponderosae	451	gi|478256711|gb|ENN76893.1|hypothetical protein YQE_06734, partial [Dendroctonus ponderosae] >gi|546685090|gb|ERL94617.1| hypothetical protein D910_11894 [Dendroctonus ponderosae]	ENN76893	5.88068e-43	82	157.918	100
contig_42981_18.44	18.44	Other	multiple epidermal growth factor-like domains protein 8 isoform x1		Tribolium castaneum	1032	gi|1004399720|gb|KYB27398.1|Multiple epidermal growth factor-like domains protein 8 [Tribolium castaneum]	KYB27398	3.60762e-141	90	452.21	276
contig_43055_33.93	33.93	UNKN	NcSP22		Nephotettix cincticeps	674	gi|775460953|dbj|BAQ94508.1|NcSP22 [Nephotettix cincticeps]	BAQ94508	1.39509e-07	48	59.3066	158
contig_43351_9.78	9.78	UNKN	uncharacterized histidine-rich protein ddb_g0274557-like		Diuraphis noxia	558	gi|985400484|ref|XP_015367915.1|PREDICTED: histidine-rich glycoprotein-like [Diuraphis noxia]	XP_015367915	3.72498e-09	93	61.6178	61
contig_4344_51.63	51.63	Cell Cycle & Processes	copine-5 isoform x2		Rhizopus microsporus	1550	gi|729716357|emb|CEI87445.1|hypothetical protein RMCBS344292_01858 [Rhizopus microsporus]	CEI87445	8.89684e-12	41	78.9518	288
contig_43441_97.59	97.59	Carbohydrate Metabolism	maltase a1-like protein		Tribolium castaneum	620	gi|91081577|ref|XP_975228.1|PREDICTED: maltase 2 isoform X1 [Tribolium castaneum] >gi|270006189|gb|EFA02637.1| Maltase A1-like Protein [Tribolium castaneum]	XP_975228	1.61903e-69	74	234.187	189
contig_43569_21.88	21.88	Defense/Immune Response	protein toll		Tribolium castaneum	607	gi|270002876|gb|EEZ99323.1|toll-like protein [Tribolium castaneum]	EEZ99323	2.75486e-09	55	66.6254	118
contig_43602_46.94	46.94	UNKN	zinc finger protein 853-like		, partial	890	gi|529085755|gb|EPZ62132.1|hypothetical protein H477_5690, partial [, partial [[Clostridium] sordellii ATCC 9714]	EPZ62132	1.86039e-39	67	147.517	135
contig_43787_12.48	12.48	UNKN	PREDICTED: uncharacterized protein LOC103312680		Tribolium castaneum	945	gi|642920044|ref|XP_008192181.1|PREDICTED: uncharacterized protein LOC103312680 [Tribolium castaneum] >gi|1008437287|ref|XP_015834946.1| PREDICTED: uncharacterized protein LOC103312680 [Tribolium castaneum] >gi|1004400748|gb|EFA02440.2| hypothetical protein TcasGA2_TC008127 [Tribolium castaneum]	XP_008192181	1.64936e-11	47	75.485	145
contig_4392_90.29	90.29	Translation	translocon-associated protein subunit delta		Tribolium castaneum	314	gi|91093903|ref|XP_969673.1|PREDICTED: translocon-associated protein subunit delta [Tribolium castaneum] >gi|270014509|gb|EFA10957.1| Translocon-associated protein subunit delta-like Protein [Tribolium castaneum]	XP_969673	9.8142e-08	71	56.6102	49
contig_43974_34.12	34.12	Nucleotide Metabolism	dnase1 protein		Sclerotinia sclerotiorum 1980	1439	gi|156050165|ref|XP_001591044.1|hypothetical protein SS1G_07669 [Sclerotinia sclerotiorum 1980] >gi|154692070|gb|EDN91808.1| hypothetical protein SS1G_07669 [Sclerotinia sclerotiorum 1980 UF-70]	XP_001591044	8.23838e-111	100	338.191	180
contig_44_13.553.36	13553.4	Proteolysis	kazal-type serine protease inhibitor	endoglucanase A	Tribolium castaneum	1516	gi|189234566|ref|XP_001815977.1|PREDICTED: endoglucanase A [Tribolium castaneum] >gi|270002079|gb|EEZ98526.1| hypothetical protein TcasGA2_TC001030 [Tribolium castaneum]	XP_001815977	1.67033e-09	67	67.0106	55
contig_441_2.022.68	2022.68	Signal Tranduction	integrin alpha-8-like		Tribolium castaneum	3091	gi|1004396103|gb|EFA09738.2|Integrin alpha-PS3-like Protein [Tribolium castaneum]	EFA09738	0	54	591.267	1007
contig_4441_2.693.64	2693.64	Defense/Immune Response	antibacterial peptide		Harmonia axyridis	664	gi|269204398|gb|ACZ28727.1|antibacterial peptide [Harmonia axyridis]	ACZ28727	6.92048e-46	78	160.999	138
contig_44522_13.09	13.09	UNKN	PREDICTED: uncharacterized protein LOC106131883 isoform X1		Amyelois transitella	775	gi|913311804|ref|XP_013186598.1|PREDICTED: uncharacterized protein LOC106131883 isoform X1 [Amyelois transitella] >gi|913311806|ref|XP_013186599.1| PREDICTED: uncharacterized protein LOC106131883 isoform X2 [Amyelois transitella]	XP_013186598	4.96105e-67	85	100.138	62
contig_447_233.53	233.53	Defense/Immune Response	immunoglobulin domain and leucine-rich repeat-containing protein 2-like		Tribolium castaneum	3909	gi|91081067|ref|XP_975439.1|PREDICTED: uncharacterized protein LOC664337 isoform X2 [Tribolium castaneum] >gi|1004400770|gb|EFA02458.2| hypothetical protein TcasGA2_TC008146 [Tribolium castaneum]	XP_975439	0	78	1097.8	850
contig_45181_27.60	27.6	UNKN	transmembrane channel-like protein 7		Oryctes borbonicus	768	gi|952521569|gb|KRT81675.1|hypothetical protein AMK59_5838 [Oryctes borbonicus]	KRT81675	6.87304e-55	78	199.519	170
contig_452_115.56	115.56	UNKN	PREDICTED: uncharacterized protein LOC658778		Tribolium castaneum	1000	gi|91077808|ref|XP_970231.1|PREDICTED: uncharacterized protein LOC658778 [Tribolium castaneum] >gi|270001488|gb|EEZ97935.1| hypothetical protein TcasGA2_TC000323 [Tribolium castaneum]	XP_970231	4.6999e-60	81	201.83	127
contig_454_1.142.43	1142.43	Proteolysis	lysosomal acid phosphatase		Cryptolaemus montrouzieri	1385	gi|972974383|gb|ALW95355.1|acid phosphatase, partial [Cryptolaemus montrouzieri]	ALW95355	1.23785e-52	51	192.586	332
contig_4581_145.91	145.91	Sensory Response	limbic system-associated membrane protein		Tribolium castaneum	3424	gi|642917621|ref|XP_008193364.1|PREDICTED: neural cell adhesion molecule 2 isoform X4 [Tribolium castaneum] >gi|1004401509|gb|KYB28423.1| Fasciclin-2-like Protein [Tribolium castaneum]	XP_008193364	6.20225e-77	57	273.092	410
contig_4583_115.61	115.61	UNKN	hypothetical protein BRAFLDRAFT_125500		Branchiostoma floridae	1106	gi|260826750|ref|XP_002608328.1|hypothetical protein BRAFLDRAFT_125500 [Branchiostoma floridae] >gi|229293679|gb|EEN64338.1| hypothetical protein BRAFLDRAFT_125500 [Branchiostoma floridae]	XP_002608328	2.09333e-42	54	160.999	279
contig_4614_25.40	25.4	Detoxification	udp-glucuronosyltransferase 2c1-like		Tribolium castaneum	2607	gi|91090214|ref|XP_967924.1|PREDICTED: 2-hydroxyacylsphingosine 1-beta-galactosyltransferase-like [Tribolium castaneum]	XP_967924	4.55567e-97	58	325.865	505
contig_46288_6.85	6.85	Carbohydrate Metabolism	glycosyl hydrolase	Glycoside hydrolases are found in the intestinal tract and in saliva where they degrade complex carbohydrates such as lactose, starch, sucrose and trehalose	Botrytis cinerea B05.10	521	gi|154304541|ref|XP_001552675.1|hypothetical protein BC1G_09146 [Botrytis cinerea B05.10]	XP_001552675	6.2884e-17	58	88.9669	130
contig_46748_15.17	15.17	Na/K-ATPase	v-type proton atpase 116 kda subunit a isoform 1 isoform x3		Acyrthosiphon pisum	574	gi|328711129|ref|XP_001951560.2|PREDICTED: V-type proton ATPase 116 kDa subunit a isoform 1-like isoform X1 [Acyrthosiphon pisum]	XP_001951560	3.96934e-125	98	385.185	190
contig_46954_9.20	9.2	Fatty Acid & Lipid Metabolism	lipid transfer protein		Medicago truncatula	304	gi|922357528|ref|XP_003617636.2|Lipid transfer protein [Medicago truncatula] >gi|657385941|gb|AET00595.2| Lipid transfer protein [Medicago truncatula]	XP_003617636	7.6766e-32	78	119.398	92
contig_47031_10.69	10.69	Transport	inorganic phosphate transporter		Malassezia globosa CBS 7966	412	gi|164656531|ref|XP_001729393.1|hypothetical protein MGL_3428 [Malassezia globosa CBS 7966] >gi|159103284|gb|EDP42179.1| hypothetical protein MGL_3428 [Malassezia globosa CBS 7966]	XP_001729393	1.30552e-42	85	150.599	100
contig_4713_32.77	32.77	DNA Replication & Repair	rna-directed dna polymerase from mobile element jockey-like		Diuraphis noxia	3069	gi|985416793|ref|XP_015373850.1|PREDICTED: RNA-directed DNA polymerase from mobile element jockey-like [Diuraphis noxia]	XP_015373850	6.38203e-23	51	113.62	231
contig_4724_635.55	635.55	Proteolysis	renin receptor		Dendroctonus ponderosae	574	gi|332375504|gb|AEE62893.1|unknown [Dendroctonus ponderosae]	AEE62893	1.81567e-34	68	135.576	129
contig_47283_16.66	16.66	Proteolysis	protease propeptide inhibitor		Sclerotinia sclerotiorum 1980	401	gi|156062954|ref|XP_001597399.1|predicted protein [Sclerotinia sclerotiorum 1980] >gi|154696929|gb|EDN96667.1| predicted protein [Sclerotinia sclerotiorum 1980 UF-70]	XP_001597399	2.13681e-60	100	193.356	95
contig_47393_16.18	16.18	Defense/Immune Response	chondroadherin-like isoform x1	protein containsleucine-rich repeats	Tribolium castaneum	1151	gi|1008441176|ref|XP_015836010.1|PREDICTED: insulin-like growth factor-binding protein complex acid labile subunit isoform X2 [Tribolium castaneum]	XP_015836010	5.94127e-139	86	419.083	315
contig_47404_26.62	26.62	Defense/Immune Response	programmed cell death protein 4		Acyrthosiphon pisum	1221	gi|193582540|ref|XP_001946425.1|PREDICTED: programmed cell death protein 4 [Acyrthosiphon pisum]	XP_001946425	0	98	672.159	345
contig_4753_164.78	164.78	Detoxification	carboxylesterase 1e		Tenebrio molitor	3592	gi|916344501|gb|AKZ17678.1|carboxylesterase CXE18 [Tenebrio molitor]	AKZ17678	0	74	746.888	612
contig_47537_10.19	10.19	UNKN	uncharacterized protein LOC100166123 precursor		Acyrthosiphon pisum	489	gi|242247395|ref|NP_001156234.1|uncharacterized protein LOC100166123 precursor [Acyrthosiphon pisum] >gi|239789881|dbj|BAH71537.1| ACYPI007022 [Acyrthosiphon pisum]	NP_001156234	2.80479e-72	77	225.713	152
contig_47846_77.64	77.64	UNKN	hypothetical protein TcasGA2_TC012038		Tribolium castaneum	582	gi|270013441|gb|EFA09889.1|hypothetical protein TcasGA2_TC012038 [Tribolium castaneum]	EFA09889	2.79905e-09	54	62.3882	92
contig_48106_16.49	16.49	OX-REDOX	saccharopine dehydrogenase-like oxidoreductase		Orussus abietinus	422	gi|817209447|ref|XP_012280776.1|PREDICTED: saccharopine dehydrogenase-like oxidoreductase [Orussus abietinus] >gi|817209449|ref|XP_012280777.1| PREDICTED: saccharopine dehydrogenase-like oxidoreductase [Orussus abietinus] >gi|817209451|ref|XP_012280778.1| PREDICTED: saccharopine dehydrogenase-like oxidoreductase [Orussus abietinus]	XP_012280776	8.38912e-26	80	110.923	80
contig_4833_841.94	841.94	UNKN	flagellar biosynthesis protein partial		bacterium JGI-2	616	gi|962405457|emb|CUU04850.1|flagellar biosynthesis protein FlhA, partial [bacterium JGI-2]	CUU04850	0.000153673	75	51.9878	36
contig_48373_9.78	9.78	UNKN	PREDICTED: uncharacterized protein LOC107361022		Tetranychus urticae	392	gi|1005949811|ref|XP_015783225.1|PREDICTED: uncharacterized protein LOC107361022 [Tetranychus urticae]	XP_015783225	1.67573e-80	96	247.284	126
contig_48737_23.05	23.05	Defense/Immune Response	protein shisa-5 isoform x1	The encoded protein is localized to the endoplasmic reticulum, and together with p53 induces apoptosis in a caspase-dependent manner.	Acyrthosiphon pisum	1080	gi|641660268|ref|XP_008181434.1|PREDICTED: uncharacterized protein LOC100163907 isoform X1 [Acyrthosiphon pisum] >gi|641660270|ref|XP_008181436.1| PREDICTED: uncharacterized protein LOC100163907 isoform X1 [Acyrthosiphon pisum] >gi|239787949|dbj|BAH70674.1| ACYPI004958 [Acyrthosiphon pisum]	XP_008181434	3.61573e-74	89	239.58	176
contig_4874_273.08	273.08	Structural	transforming growth factor-beta-induced protein ig-h3 isoform x1	This protein plays a role in cell-collagen interactions and may be involved in endochondrial bone formation in cartilage	Tribolium castaneum	2398	gi|91095131|ref|XP_971500.1|PREDICTED: transforming growth factor-beta-induced protein ig-h3 [Tribolium castaneum] >gi|270015611|gb|EFA12059.1| Periostin-like Protein [Tribolium castaneum]	XP_971500	0	72	778.474	794
contig_4910_255.40	255.4	Other	mucin-3a isoform x2	One example of glycoproteins found in the body is mucins, which are secreted in the mucus of the respiratory and digestive tracts. The sugars when attached to mucins give them considerable water-holding capacity and also make them resistant to proteolysis by digestive enzymes	Tribolium castaneum	1668	gi|642913634|ref|XP_008201096.1|PREDICTED: mucin-3A isoform X2 [Tribolium castaneum]	XP_008201096	1.91827e-15	49	90.8929	328
contig_49395_5.39	5.39	UNKN	hypothetical protein D910_04084		Dendroctonus ponderosae	940	gi|546675493|gb|ERL86678.1|hypothetical protein D910_04084 [Dendroctonus ponderosae]	ERL86678	5.7857e-50	62	177.178	210
contig_49446_63.44	63.44	Metabolism	urease accessory	Urease is a nickel-binding enzyme that catalyses the hydrolysis of urea to form ammonia and carbamate	Diuraphis noxia	525	gi|985408969|ref|XP_015369859.1|PREDICTED: urease accessory protein UreE-like [Diuraphis noxia]	XP_015369859	3.36811e-14	69	75.0998	63
contig_49468_9.72	9.72	UNKN	family protein		Sclerotinia sclerotiorum 1980	687	gi|156044863|ref|XP_001588987.1|hypothetical protein SS1G_09620 [Sclerotinia sclerotiorum 1980] >gi|154694015|gb|EDN93753.1| hypothetical protein SS1G_09620 [Sclerotinia sclerotiorum 1980 UF-70]	XP_001588987	1.35083e-125	100	370.163	176
contig_4987_394.45	394.45	Fatty Acid & Lipid Metabolism	apolipoprotein d-like		Acromyrmex echinatior	768	gi|746844877|ref|XP_011052711.1|PREDICTED: apolipoprotein D-like [Acromyrmex echinatior] >gi|746844879|ref|XP_011052712.1| PREDICTED: apolipoprotein D-like [Acromyrmex echinatior]	XP_011052711	3.12131e-46	60	164.851	185
contig_50208_18.96	18.96	Defense/Immune Response	fibrinogen c domain-containing protein 1		Exaiptasia pallida	548	gi|999988038|gb|KXJ27141.1|Fibrinogen C domain-containing protein 1 [Exaiptasia pallida]	KXJ27141	2.2592e-36	62	139.043	162
contig_50267_15.76	15.76	Other	neurogenic locus notch homolog protein 1		Daphnia pulex	575	gi|321473209|gb|EFX84177.1|hypothetical protein DAPPUDRAFT_194717 [Daphnia pulex]	EFX84177	8.32311e-31	61	127.102	159
contig_50485_10.99	10.99	Proteolysis	osteopetrosis-associated transmembrane protein 1-like		Acyrthosiphon pisum	315	gi|648216276|ref|NP_001280434.1|uncharacterized protein LOC100163531 [Acyrthosiphon pisum] >gi|239792525|dbj|BAH72596.1| ACYPI004614 [Acyrthosiphon pisum]	NP_001280434	3.16397e-25	88	106.301	63
contig_5073_489.25	489.25	Proteolysis	disintegrin and metalloproteinase domain-containing protein 12-like protein		Tribolium castaneum	1488	gi|1004395882|gb|KYB25178.1|Disintegrin and metalloproteinase domain-containing protein 12-like Protein [Tribolium castaneum]	KYB25178	4.41862e-135	68	424.861	425
contig_50950_24.43	24.43	Sensory Response	chemosensory protein 3		Aphis gossypii	609	gi|449332672|gb|AGE97645.1|chemosensory protein 6 [Aphis gossypii]	AGE97645	4.39532e-80	96	247.284	131
contig_50958_16.34	16.34	UNKN	PREDICTED: uncharacterized protein LOC107169084		Diuraphis noxia	834	gi|985417500|ref|XP_015374203.1|PREDICTED: uncharacterized protein LOC107169084 [Diuraphis noxia]	XP_015374203	3.88497e-60	99	198.364	100
contig_51012_9.38	9.38	UNKN	hypothetical protein SS1G_07532		Sclerotinia sclerotiorum 1980	381	gi|156052246|ref|XP_001592084.1|hypothetical protein SS1G_07532 [Sclerotinia sclerotiorum 1980] >gi|154705308|gb|EDO05047.1| hypothetical protein SS1G_07532 [Sclerotinia sclerotiorum 1980 UF-70]	XP_001592084	5.30791e-14	100	75.485	72
contig_5109_9.09	9.09	Heat Shock/Stess Response	dnaj homolog subfamily c member 3		Tursiops truncatus	369	gi|470597737|ref|XP_004311500.1|PREDICTED: dnaJ homolog subfamily C member 3, partial [Tursiops truncatus]	XP_004311500	6.63182e-22	75	94.3597	76
contig_51172_9.59	9.59	Development	craniofacial development protein 2-like		Diaphorina citri	330	gi|662222175|ref|XP_008485317.1|PREDICTED: uncharacterized protein LOC103521989 [Diaphorina citri]	XP_008485317	1.40446e-15	65	80.8777	107
contig_51407_7.26	7.26	UNKN	tm2 domain-containing protein cg11103		Anopheles gambiae str. PEST	300	gi|347968621|ref|XP_312091.5|AGAP002821-PA [Anopheles gambiae str. PEST] >gi|333467919|gb|EAA07714.5| AGAP002821-PA [Anopheles gambiae str. PEST]	XP_312091	1.42838e-10	72	64.6994	62
contig_51601_16.34	16.34	UNKN	PREDICTED: uncharacterized protein LOC100572096		Acyrthosiphon pisum	525	gi|328713307|ref|XP_003245040.1|PREDICTED: uncharacterized protein LOC100572096 [Acyrthosiphon pisum]	XP_003245040	6.34244e-09	50	61.2326	125
contig_5187_61.73	61.73	Proteolysis	reversion-inducing cysteine-rich protein with kazal motifs	In normal cells, this membrane-anchored glycoprotein may serve as a negative regulator for matrix metalloproteinase-9, a key enzyme involved in tumor invasion and metastasis	Tribolium castaneum	2527	gi|642933550|ref|XP_008197466.1|PREDICTED: reversion-inducing cysteine-rich protein with Kazal motifs [Tribolium castaneum]	XP_008197466	0	77	1026.16	790
contig_51989_30.52	30.52	Signal Tranduction	kielin chordin-like protein	Kielin/chordin-like protein, a novel enhancer of BMP signaling, attenuates renal fibrotic disease	Tribolium castaneum	627	gi|642920046|ref|XP_975305.2|PREDICTED: kielin/chordin-like protein [Tribolium castaneum] >gi|270005328|gb|EFA01776.1| Kielin/chordin-like protein [Tribolium castaneum]	XP_975305	1.14903e-70	76	228.794	179
contig_52172_36.04	36.04	UNKN	PREDICTED: uncharacterized protein LOC100141972		Tribolium castaneum	490	gi|189240937|ref|XP_001811012.1|PREDICTED: uncharacterized protein LOC100141972 [Tribolium castaneum] >gi|270013443|gb|EFA09891.1| hypothetical protein TcasGA2_TC012040 [Tribolium castaneum]	XP_001811012	2.15554e-10	54	65.0846	93
contig_52222_11.78	11.78	Defense/Immune Response	insulin-like growth factor-binding protein complex acid labile subunit isoform x1		Tribolium castaneum	664	gi|642940167|ref|XP_008194639.1|PREDICTED: TLR4 interactor with leucine rich repeats [Tribolium castaneum]	XP_008194639	1.35977e-29	59	124.405	177
contig_52547_14.01	14.01	Transport	sid-1-related b isoform x1	These data indicate that systemic RNAi in C. elegans involves SID-1-mediated intercellular transport of dsRNA	Tribolium castaneum	514	gi|270014245|gb|EFA10693.1|systemic RNA interference defective protein 1 [Tribolium castaneum]	EFA10693	3.85474e-10	61	68.5514	77
contig_5279_124.29	124.29	Signal Tranduction	gp150 protein	gp150 transduces signals via phosphorylation of its ITAM-like elements	Dendroctonus ponderosae	2777	gi|478262631|gb|ENN81195.1|hypothetical protein YQE_02385, partial [Dendroctonus ponderosae]	ENN81195	6.0852e-60	53	228.794	454
contig_5282_168.42	168.42	Detoxification	carboxylesterase 1e		Tribolium castaneum	1558	gi|91076018|ref|XP_971559.1|PREDICTED: uncharacterized protein LOC660215 [Tribolium castaneum] >gi|270014604|gb|EFA11052.1| hypothetical protein TcasGA2_TC004646 [Tribolium castaneum]	XP_971559	1.22042e-29	71	123.635	100
contig_5299_118.62	118.62	UNKN	hypothetical protein YQE_08052, partial		Dendroctonus ponderosae	2049	gi|478255274|gb|ENN75503.1|hypothetical protein YQE_08052, partial [Dendroctonus ponderosae]	ENN75503	3.8232e-148	58	459.144	588
contig_5312_146.81	146.81	Defense/Immune Response	toll-like receptor 2		Tribolium castaneum	3112	gi|1008447818|ref|XP_015837871.1|PREDICTED: toll-like receptor 2 [Tribolium castaneum] >gi|1004397469|gb|KYB26109.1| Toll-like receptor 2 [Tribolium castaneum]	XP_015837871	4.27698e-174	59	543.117	837
contig_53413_6.34	6.34	Transport	organic cation transporter protein		Diuraphis noxia	588	gi|985387765|ref|XP_015376491.1|PREDICTED: organic cation transporter protein-like [Diuraphis noxia]	XP_015376491	3.95222e-42	96	159.844	84
contig_53581_10.56	10.56	Detoxification	udp-glucuronosyltransferase 2c1-like		Tribolium castaneum	900	gi|642939822|ref|XP_973091.2|PREDICTED: UDP-glucuronosyltransferase 1-7 [Tribolium castaneum] >gi|270015479|gb|EFA11927.1| UDP-glucuronosyltransferase 1-8-like Protein [Tribolium castaneum]	XP_973091	1.73329e-43	55	166.777	292
contig_53603_10.61	10.61	Proteolysis	gamma-interferon-inducible lysosomal thiol reductase-like		Acyrthosiphon pisum	369	gi|193606219|ref|XP_001951050.1|PREDICTED: gamma-interferon-inducible lysosomal thiol reductase-like [Acyrthosiphon pisum]	XP_001951050	8.52109e-42	89	149.828	86
contig_53671_7.33	7.33	Carbohydrate Metabolism	polysaccharide lyase family 14 protein		Lichtheimia ramosa	780	gi|671688473|emb|CDS02791.1|hypothetical protein LRAMOSA00195 [Lichtheimia ramosa]	CDS02791	3.20591e-49	57	175.637	237
contig_54147_11.14	11.14	Defense/Immune Response	leucine-rich repeat-containing protein 15		Dendroctonus ponderosae	803	gi|546671047|gb|ERL83536.1|hypothetical protein D910_00589 [Dendroctonus ponderosae]	ERL83536	1.26733e-70	81	242.662	182
contig_54403_11.72	11.72	Defense/Immune Response	neuronal pentraxin-2	are a superfamily of multifunctional conserved proteins, some of which are components of the humoral arm of innate immunity and behave as functional ancestors of antibodies (Abs)	Oryctes borbonicus	448	gi|952530363|gb|KRT83578.1|hypothetical protein AMK59_3875, partial [Oryctes borbonicus]	KRT83578	2.16203e-15	68	80.1073	76
contig_5444_187.40	187.4	UNKN	dyslexia-associated protein kiaa0319		Tribolium castaneum	3918	gi|642930787|ref|XP_008196091.1|PREDICTED: dyslexia-associated protein KIAA0319-like protein [Tribolium castaneum] >gi|642930789|ref|XP_008196092.1| PREDICTED: dyslexia-associated protein KIAA0319-like protein [Tribolium castaneum] >gi|270011970|gb|EFA08418.1| Dyslexia-associated protein KIAA0319-like protein [Tribolium castaneum]	XP_008196091	0	77	1259.97	972
contig_54757_19.19	19.19	UNKN	uncharacterized protein LOC100167199 precursor		Acyrthosiphon pisum	404	gi|240848681|ref|NP_001155735.1|uncharacterized protein LOC100167199 precursor [Acyrthosiphon pisum] >gi|239793577|dbj|BAH72899.1| ACYPI008012 [Acyrthosiphon pisum]	NP_001155735	2.95766e-33	83	125.176	80
contig_5484_35.82	35.82	UNKN	PREDICTED: uncharacterized protein LOC103314414		Tribolium castaneum	731	gi|642937060|ref|XP_008198673.1|PREDICTED: uncharacterized protein LOC103314414 [Tribolium castaneum] >gi|1004395732|gb|EEZ97490.2| hypothetical protein TcasGA2_TC011332 [Tribolium castaneum]	XP_008198673	8.46014e-16	55	82.0333	146
contig_54866_17.40	17.4	Transport	niemann-pick type c-2f		Anopheles gambiae str. PEST	362	gi|118782114|ref|XP_312062.2|AGAP002852-PA [Anopheles gambiae str. PEST] >gi|116129416|gb|EAA07746.2| AGAP002852-PA [Anopheles gambiae str. PEST]	XP_312062	1.74822e-16	65	81.6481	79
contig_55432_10.81	10.81	Proteolysis	protein cereblon homolog	Cereblon forms an E3 ubiquitin ligase complex with damaged DNA binding protein 1	Diuraphis noxia	1283	gi|985396071|ref|XP_015365519.1|PREDICTED: protein cereblon homolog [Diuraphis noxia]	XP_015365519	3.41943e-105	98	322.013	182
contig_55915_31.69	31.69	Proteolysis	turripeptide -like	May act as a serine protease inhibitor, since it possess the kazal serine protease inhibitor signature	Tribolium castaneum	479	gi|642931928|ref|XP_008196784.1|PREDICTED: turripeptide Gli9.1 [Tribolium castaneum] >gi|270012252|gb|EFA08700.1| hypothetical protein TcasGA2_TC006371 [Tribolium castaneum]	XP_008196784	3.31234e-07	58	55.4546	75
contig_55934_25.23	25.23	UNKN	uncharacterized protein LOC100167199 precursor		Acyrthosiphon pisum	689	gi|240848681|ref|NP_001155735.1|uncharacterized protein LOC100167199 precursor [Acyrthosiphon pisum] >gi|239793577|dbj|BAH72899.1| ACYPI008012 [Acyrthosiphon pisum]	NP_001155735	1.84183e-72	86	229.565	143
contig_560_1.121.62	1121.62	Exocuticle-related	chitin binding protein		Plutella xylostella	965	gi|768441532|ref|XP_011562498.1|PREDICTED: uncharacterized protein LOC105392551 [Plutella xylostella]	XP_011562498	4.89448e-27	42	122.865	274
contig_56102_11.76	11.76	RNA Processing	ribonuclease oy		Zootermopsis nevadensis	1509	gi|646716113|gb|KDR19500.1|Ribonuclease Oy [Zootermopsis nevadensis]	KDR19500	6.32467e-49	68	148.288	130
contig_566_3.764.02	3764.02	UNKN	hypothetical protein TcasGA2_TC008755		Tribolium castaneum	2067	gi|270009491|gb|EFA05939.1|hypothetical protein TcasGA2_TC008755 [Tribolium castaneum]	EFA05939	6.22789e-23	49	112.464	351
contig_5660_50.09	50.09	Fatty Acid & Lipid Metabolism	low-density lipoprotein receptor class a domain-containing protein 3		Tribolium castaneum	2110	gi|91085269|ref|XP_967005.1|PREDICTED: low-density lipoprotein receptor class A domain-containing protein 3 [Tribolium castaneum] >gi|270008445|gb|EFA04893.1| hypothetical protein TcasGA2_TC014957 [Tribolium castaneum]	XP_967005	2.30737e-84	62	284.263	408
contig_5672_24.80	24.8	UNKN	ACYPI007833		Acyrthosiphon pisum	1734	gi|239788786|dbj|BAH71056.1|ACYPI007833 [Acyrthosiphon pisum]	BAH71056	1.81945e-84	82	274.633	186
contig_57511_11.58	11.58	UNKN	hypothetical protein RP20_CCG006490		Aedes albopictus	300	gi|1000214016|gb|KXJ83365.1|hypothetical protein RP20_CCG006490 [Aedes albopictus]	KXJ83365	0.000304513	59	45.8246	62
contig_57529_25.49	25.49	UNKN	hypothetical protein RO3G_11844		Rhizopus delemar RA 99-880	315	gi|384496642|gb|EIE87133.1|hypothetical protein RO3G_11844 [Rhizopus delemar RA 99-880]	EIE87133	2.77609e-55	100	178.718	87
contig_57739_5.93	5.93	Structural	adhesive plaque matrix protein isoform x2	sites of transmembrane interaction between the extracellular matrix and the actin cytoskeleton	Acyrthosiphon pisum	576	gi|641662077|ref|XP_003243881.2|PREDICTED: uncharacterized protein LOC100568587 [Acyrthosiphon pisum]	XP_003243881	6.54422e-89	97	275.404	146
contig_57807_10.83	10.83	Cell Cycle & Processes	growth arrest-specific protein 1-like isoform x2	thought to be involved in the stimulation of cell proliferation	Tribolium castaneum	306	gi|642927468|ref|XP_008195285.1|PREDICTED: growth arrest-specific protein 1 [Tribolium castaneum] >gi|270009958|gb|EFA06406.1| Growth arrest-specific protein 1-like Protein [Tribolium castaneum]	XP_008195285	4.56158e-31	79	120.939	82
contig_579_315.04	315.04	Signal Tranduction	vascular endothelial growth factor receptor 1 isoform x1		Tribolium castaneum	5149	gi|642919373|ref|XP_008191844.1|PREDICTED: vascular endothelial growth factor receptor 1 isoform X1 [Tribolium castaneum]	XP_008191844	0	66	1343.18	1417
contig_58127_9.00	9	UNKN	hypothetical protein YQE_11898, partial		Dendroctonus ponderosae	300	gi|478250909|gb|ENN71394.1|hypothetical protein YQE_11898, partial [Dendroctonus ponderosae]	ENN71394	0.000213215	68	49.6766	51
contig_5831_172.40	172.4	Other	multiple epidermal growth factor-like domains protein 10 isoform x1		Tribolium castaneum	3886	gi|189234402|ref|XP_974971.2|PREDICTED: multiple epidermal growth factor-like domains protein 10 isoform X1 [Tribolium castaneum] >gi|270002777|gb|EEZ99224.1| draper [Tribolium castaneum]	XP_974971	0	83	1421.37	989
contig_58743_22.78	22.78	Cell Cycle & Processes	copine-1 isoform x2	copines are thought to be involved in membrane-trafficking phenomena because of their phospholipid-binding properties	Phytophthora infestans T30-4	753	gi|301103624|ref|XP_002900898.1|copine, putative [Phytophthora infestans T30-4] >gi|262101653|gb|EEY59705.1| copine, putative [Phytophthora infestans T30-4]	XP_002900898	3.25001e-07	45	60.8474	195
contig_58951_11.98	11.98	Signal Tranduction	activating signal cointegrator 1 complex subunit 2 homolog		Diuraphis noxia	361	gi|985395941|ref|XP_015365446.1|PREDICTED: activating signal cointegrator 1 complex subunit 2 homolog [Diuraphis noxia]	XP_015365446	2.20331e-28	92	113.62	67
contig_59040_17.23	17.23	UNKN	PREDICTED: uncharacterized protein LOC100163955, partial		Acyrthosiphon pisum	345	gi|641676001|ref|XP_001948588.3|PREDICTED: uncharacterized protein LOC100163955, partial [Acyrthosiphon pisum]	XP_001948588	8.3356e-06	60	51.2174	60
contig_59065_5.72	5.72	Translation	39s ribosomal protein mitochondrial		Pediculus humanus corporis	412	gi|242007404|ref|XP_002424530.1|glutamyl-tRNA amidotransferase [Pediculus humanus corporis] >gi|212507963|gb|EEB11792.1| glutamyl-tRNA amidotransferase [Pediculus humanus corporis]	XP_002424530	1.22516e-10	56	65.0846	95
contig_5922_107.85	107.85	Defense/Immune Response	single ig il-1-related receptor-like	Acts as a negative regulator of the Toll-like and IL-1R receptor signaling pathways.	Tribolium castaneum	1680	gi|189237377|ref|XP_971339.2|PREDICTED: X-linked interleukin-1 receptor accessory protein-like 2 [Tribolium castaneum] >gi|1004399310|gb|KYB27166.1| X-linked interleukin-1 receptor accessory protein-like 2 [Tribolium castaneum]	XP_971339	1.09261e-163	69	487.649	467
contig_5944_55.46	55.46	Sensory Response	esterase-6-like protein		Leptinotarsa decemlineata	1771	gi|728417098|gb|AIY68333.1|esterase, partial [Leptinotarsa decemlineata]	AIY68333	2.93643e-137	60	424.091	569
contig_59461_33.14	33.14	DNA Replication & Repair	rna-directed dna polymerase from transposon bs-like protein		Tribolium castaneum	485	gi|1008451853|ref|XP_015838953.1|PREDICTED: uncharacterized protein LOC107398643 [Tribolium castaneum] >gi|1008455787|ref|XP_015840045.1| PREDICTED: uncharacterized protein LOC107398970 [Tribolium castaneum]	XP_015838953	2.32428e-18	51	89.7373	148
contig_59580_9.03	9.03	Carbohydrate Metabolism	dolichyl-diphosphooligosaccharide--protein glycosyltransferase subunit 1		Diuraphis noxia	546	gi|985416448|ref|XP_015373682.1|PREDICTED: dolichyl-diphosphooligosaccharide--protein glycosyltransferase subunit 1 [Diuraphis noxia] >gi|985416450|ref|XP_015373683.1| PREDICTED: dolichyl-diphosphooligosaccharide--protein glycosyltransferase subunit 1 [Diuraphis noxia]	XP_015373682	3.25023e-52	98	187.578	96
contig_5968_100.96	100.96	Cell Cycle & Processes	chaoptin-like protein	chaoptin, a member of the leucine-rich repeat family, is a photoreceptor cell-specific adhesion molecule	Microplitis demolitor	4004	gi|939679313|ref|XP_014299151.1|PREDICTED: uncharacterized protein LOC106693974 [Microplitis demolitor]	XP_014299151	1.60136e-26	60	87.4261	107
contig_59962_16.16	16.16	Defense/Immune Response	leucine-rich repeat-containing protein 70		Tribolium castaneum	2064	gi|1008450567|ref|XP_015838554.1|PREDICTED: leucine-rich repeat-containing protein 70 [Tribolium castaneum] >gi|1008450569|ref|XP_015838555.1| PREDICTED: leucine-rich repeat-containing protein 70 [Tribolium castaneum] >gi|1008450571|ref|XP_015838556.1| PREDICTED: leucine-rich repeat-containing protein 70 [Tribolium castaneum]	XP_015838554	0	88	710.294	487
contig_6010_78.67	78.67	Carbohydrate Metabolism	gdp-fucose protein o-fucosyltransferase 2	an enzyme responsible for adding fucose sugars in O linkage to serine or threonine residues in Thrombospondin repeats	Tribolium castaneum	2073	gi|642927261|ref|XP_008195198.1|PREDICTED: GDP-fucose protein O-fucosyltransferase 2 [Tribolium castaneum] >gi|1004398622|gb|EFA07652.2| GDP-fucose protein O-fucosyltransferase 2-like Protein [Tribolium castaneum]	XP_008195198	5.10599e-142	68	434.491	422
contig_605_169.22	169.22	UNKN	PREDICTED: uncharacterized protein LOC103313006 isoform X1		Tribolium castaneum	1259	gi|642922824|ref|XP_008193341.1|PREDICTED: uncharacterized protein LOC103313006 isoform X1 [Tribolium castaneum]	XP_008193341	2.09127e-28	66	120.168	153
contig_61061_16.70	16.7	Cell Cycle & Processes	mip18 family protein cg30152	May play a role in chromosome segregation through establishment of sister chromatid cohesion	Diuraphis noxia	349	gi|985409274|ref|XP_015370025.1|PREDICTED: MIP18 family protein CG30152 [Diuraphis noxia]	XP_015370025	3.1368e-16	96	81.2629	57
contig_61926_16.93	16.93	Sensory Response	os-d-like os-d1		Aphis gossypii	1131	gi|449332678|gb|AGE97648.1|chemosensory protein 9 [Aphis gossypii]	AGE97648	2.92207e-94	92	291.967	167
contig_62235_76.68	76.68	Defense/Immune Response	attacin 2		Tribolium castaneum	699	gi|189236047|ref|XP_001809216.1|PREDICTED: uncharacterized protein LOC100142481 [Tribolium castaneum] >gi|270006406|gb|EFA02854.1| hypothetical protein TcasGA2_TC007737 [Tribolium castaneum]	XP_001809216	9.91706e-40	60	146.362	164
contig_63_3.200.38	3200.38	Proteolysis	lysosomal acid phosphatase		Cryptolaemus montrouzieri	1362	gi|972974383|gb|ALW95355.1|acid phosphatase, partial [Cryptolaemus montrouzieri]	ALW95355	1.20863e-70	55	239.965	358
contig_63186_8.87	8.87	Development	protein yellow		Diuraphis noxia	394	gi|985397022|ref|XP_015366036.1|PREDICTED: protein yellow [Diuraphis noxia]	XP_015366036	1.5172e-78	99	250.366	124
contig_63534_10.98	10.98	Transport	atp-binding cassette sub-family a member 3 isoform x3		Tribolium castaneum	482	gi|1008456844|ref|XP_008199128.2|PREDICTED: ATP-binding cassette sub-family A member 3 isoform X1 [Tribolium castaneum]	XP_008199128	4.26071e-07	48	59.3066	153
contig_6364_41.97	41.97	UNKN	store-operated calcium entry regulator stimate-like		Tribolium castaneum	689	gi|91087255|ref|XP_975528.1|PREDICTED: store-operated calcium entry regulator STIMATE [Tribolium castaneum] >gi|270009551|gb|EFA05999.1| Transmembrane protein 110-like Protein [Tribolium castaneum]	XP_975528	1.53462e-90	87	280.411	183
contig_63741_10.56	10.56	UNKN	dystrobrevin beta isoform x4		Tribolium castaneum	394	gi|1004399545|gb|KYB27292.1|Dystrophin, isoform D-like Protein [Tribolium castaneum]	KYB27292	2.9994e-62	95	213.001	123
contig_64474_11.04	11.04	DNA Replication & Repair	reverse transcriptase		Diaphorina citri	464	gi|662220831|ref|XP_008484571.1|PREDICTED: uncharacterized protein LOC103521244 [Diaphorina citri]	XP_008484571	2.29485e-08	52	62.7734	88
contig_6456_124.29	124.29	Fatty Acid & Lipid Metabolism	neutral ceramidase	Hydrolyzes the sphingolipid ceramide into sphingosine and free fatty acid	Tribolium castaneum	2570	gi|642937018|ref|XP_008198655.1|PREDICTED: neutral ceramidase-like [Tribolium castaneum]	XP_008198655	0	77	907.901	688
contig_64625_18.00	18	Protein & Amino Acid Metabolism	n-acyl-d-amino-acid deacylase domain partial		Bordetella bronchiseptica A1-7	687	gi|633378187|gb|KDB65144.1|N-acyl-D-amino-acid deacylase domain protein, partial [Bordetella bronchiseptica A1-7]	KDB65144	0.00014757	72	51.9878	36
contig_64630_10.02	10.02	Transport	protein scarlet-like	art of a membrane-spanning permease system necessary for the transport of pigment precursors into pigment cells responsible for eye color	Acyrthosiphon pisum	339	gi|328712876|ref|XP_001942858.2|PREDICTED: protein scarlet-like [Acyrthosiphon pisum]	XP_001942858	3.34315e-63	97	214.157	113
contig_64695_6.52	6.52	Exocuticle-related	larval cuticle protein 8-like		Tribolium castaneum	525	gi|642923944|ref|XP_008193936.1|PREDICTED: flexible cuticle protein 12 [Tribolium castaneum] >gi|1004399527|gb|EFA03332.2| Larval cuticle protein 5-like Protein [Tribolium castaneum]	XP_008193936	2.94034e-25	60	105.531	128
contig_6477_8.41	8.41	UNKN	hypothetical protein COCOR_01208		Corallococcus coralloides DSM 2259	331	gi|380727929|gb|AFE03931.1|hypothetical protein COCOR_01208 [Corallococcus coralloides DSM 2259]	AFE03931	1.32911e-15	63	79.7221	82
contig_64908_5.73	5.73	Proteolysis	transmembrane protease serine 2		Nilaparvata lugens	303	gi|659100712|gb|AID60362.1|trypsin-28 [Nilaparvata lugens]	AID60362	1.65378e-15	70	79.337	75
contig_65275_13.94	13.94	UNKN	oxysterol-binding protein 9	Oxysterols are oxidized derivatives of cholesterol, which may be important in many biological processes	Diuraphis noxia	499	gi|985399385|ref|XP_015367309.1|PREDICTED: oxysterol-binding protein-related protein 9-like [Diuraphis noxia]	XP_015367309	2.5338e-49	98	177.178	88
contig_65414_14.36	14.36	UNKN	colorectal mutant cancer isoform x2		Tribolium castaneum	419	gi|642914130|ref|XP_008201557.1|PREDICTED: colorectal mutant cancer protein isoform X3 [Tribolium castaneum]	XP_008201557	1.17526e-26	95	115.546	61
contig_6592_55.37	55.37	UNKN	PREDICTED: uncharacterized protein LOC103312214		Tribolium castaneum	3766	gi|642915242|ref|XP_008190538.1|PREDICTED: uncharacterized protein LOC103312214 [Tribolium castaneum] >gi|1004402368|gb|EFA00394.2| hypothetical protein TcasGA2_TC003242 [Tribolium castaneum]	XP_008190538	1.43267e-171	64	538.88	692
contig_665_1.295.09	1295.09	Signal Tranduction	integrin alpha-ps4		Tribolium castaneum	1891	gi|1004396103|gb|EFA09738.2|Integrin alpha-PS3-like Protein [Tribolium castaneum]	EFA09738	4.60369e-134	59	431.409	564
contig_66531_5.26	5.26	Exocuticle-related	endocuticle structural glycoprotein bd-2-like		Acyrthosiphon pisum	326	gi|288558746|ref|NP_001165736.1|RR1 cuticle protein 5 [Acyrthosiphon pisum]	NP_001165736	4.78975e-58	97	196.823	100
contig_6678_195.07	195.07	Sensory Response	os-d-like protein		Aphis gossypii	733	gi|449332668|gb|AGE97643.1|chemosensory protein 4 [Aphis gossypii] >gi|458591962|gb|AGG38798.1| chemosensory protein [Aphis gossypii]	AGE97643	6.09403e-80	98	249.21	137
contig_6681_573.50	573.5	UNKN	hydrolase		Daphnia pulex	623	gi|321476945|gb|EFX87904.1|hypothetical protein DAPPUDRAFT_305597 [Daphnia pulex]	EFX87904	1.60076e-28	58	115.546	139
contig_6696_74.33	74.33	Development	lanb2	salivary gland morphogenesis	Tribolium castaneum	4668	gi|91092436|ref|XP_968632.1|PREDICTED: laminin subunit gamma-1 isoform X1 [Tribolium castaneum] >gi|1004401696|gb|EFA01213.2| Laminin subunit gamma-1-like Protein [Tribolium castaneum]	XP_968632	0	80	1890.16	1484
contig_6719_57.87	57.87	Defense/Immune Response	peroxidasin isoform x1	We propose that peroxidasin functions uniquely in extracellular matrix consolidation, phagocytosis and defense	Tribolium castaneum	4569	gi|91094043|ref|XP_968570.1|PREDICTED: peroxidasin isoform X1 [Tribolium castaneum] >gi|270004795|gb|EFA01243.1| peroxidasin [Tribolium castaneum]	XP_968570	0	77	1704.11	1309
contig_6728_283.14	283.14	Signal Tranduction	protein sel-1 homolog 1	Sel1-like repeat proteins in signal transduction	Tribolium castaneum	2564	gi|1008444202|ref|XP_015836831.1|PREDICTED: protein sel-1 homolog 1 isoform X3 [Tribolium castaneum]	XP_015836831	0	86	999.194	712
contig_67419_27.02	27.02	Fatty Acid & Lipid Metabolism	prostatic acid phosphatase isoform x1		Cryptolaemus montrouzieri	565	gi|972974383|gb|ALW95355.1|acid phosphatase, partial [Cryptolaemus montrouzieri]	ALW95355	5.60414e-51	78	179.489	128
contig_68155_18.68	18.68	Development	brevican core protein		Danaus plexippus	678	gi|357613018|gb|EHJ68272.1|hypothetical protein KGM_09316 [Danaus plexippus]	EHJ68272	6.09004e-34	63	131.724	133
contig_68223_8.96	8.96	UNKN	hypothetical protein MGYG_03342		Microsporum gypseum CBS 118893	423	gi|315052896|ref|XP_003175822.1|hypothetical protein MGYG_03342 [Microsporum gypseum CBS 118893] >gi|311341137|gb|EFR00340.1| hypothetical protein MGYG_03342 [Microsporum gypseum CBS 118893]	XP_003175822	0.000351921	56	46.2098	53
contig_684_15.271.58	15271.6	UNKN	PREDICTED: uncharacterized protein LOC103314030		Tribolium castaneum	735	gi|642932764|ref|XP_008196974.1|PREDICTED: uncharacterized protein LOC103314030 [Tribolium castaneum] >gi|1004396822|gb|KYB25724.1| hypothetical protein TcasGA2_TC034129 [Tribolium castaneum]	XP_008196974	8.51937e-05	47	51.2174	105
contig_6886_120.20	120.2	Heat Shock/Stess Response	immediate early response 3-interacting protein 1		Tribolium castaneum	411	gi|642925502|ref|XP_008194577.1|PREDICTED: immediate early response 3-interacting protein 1 [Tribolium castaneum] >gi|1004397104|gb|EFA05304.2| Immediate early response 3-interacting protein 1-like Protein [Tribolium castaneum]	XP_008194577	6.30588e-31	93	117.857	65
contig_68992_7.12	7.12	UNKN	27 kda hemolymph		Diuraphis noxia	550	gi|985413724|ref|XP_015372348.1|PREDICTED: 27 kDa hemolymph protein-like [Diuraphis noxia]	XP_015372348	4.6948e-114	96	339.347	183
contig_6910_671.77	671.77	Development	brevican core protein		Danaus plexippus	1215	gi|357613018|gb|EHJ68272.1|hypothetical protein KGM_09316 [Danaus plexippus]	EHJ68272	7.82032e-28	63	119.398	141
contig_6926_52.89	52.89	Sensory Response	ejaculatory bulb-specific protein 3		Aphis gossypii	615	gi|458591978|gb|AGG38799.1|chemosensory protein [Aphis gossypii]	AGG38799	6.89785e-77	95	239.58	129
contig_69408_9.17	9.17	UNKN	mCG53544		Mus musculus	426	gi|148704755|gb|EDL36702.1|mCG53544 [Mus musculus]	EDL36702	3.41133e-09	63	62.003	66
contig_6954_179.66	179.66	UNKN	PREDICTED: uncharacterized protein LOC103313584		Tribolium castaneum	1242	gi|642913362|ref|XP_008195422.1|PREDICTED: uncharacterized protein LOC103313584 [Tribolium castaneum] >gi|1004402769|gb|KYB29179.1| hypothetical protein TcasGA2_TC034553 [Tribolium castaneum]	XP_008195422	1.37084e-13	58	78.1814	127
contig_69777_7.23	7.23	UNKN	hypothetical protein TcasGA2_TC005036		Tribolium castaneum	337	gi|270015861|gb|EFA12309.1|hypothetical protein TcasGA2_TC005036 [Tribolium castaneum]	EFA12309	9.59068e-09	75	61.6178	80
contig_6987_353.41	353.41	Proteolysis	93 kda serpin		Tenebrio molitor	2028	gi|349584988|dbj|BAL03254.1|93 kDa serpin [Tenebrio molitor]	BAL03254	0	77	572.392	434
contig_70027_5.92	5.92	UNKN	uncharacterized protein LOC100168749 precursor		Acyrthosiphon pisum	600	gi|240848789|ref|NP_001155799.1|uncharacterized protein LOC100168749 precursor [Acyrthosiphon pisum] >gi|239788070|dbj|BAH70730.1| ACYPI009426 [Acyrthosiphon pisum]	NP_001155799	7.45026e-93	96	280.796	154
contig_7003_28.79	28.79	UNKN	PREDICTED: uncharacterized protein LOC107163936		Diuraphis noxia	645	gi|985398941|ref|XP_015367067.1|PREDICTED: uncharacterized protein LOC107163936 [Diuraphis noxia]	XP_015367067	2.04016e-53	72	181.8	187
contig_70267_18.13	18.13	Fatty Acid & Lipid Metabolism	inactive pancreatic lipase-related protein 1		Tribolium castaneum	1070	gi|91086511|ref|XP_971476.1|PREDICTED: inactive pancreatic lipase-related protein 1 [Tribolium castaneum] >gi|642928328|ref|XP_008195535.1| PREDICTED: inactive pancreatic lipase-related protein 1 [Tribolium castaneum] >gi|642928330|ref|XP_008195536.1| PREDICTED: inactive pancreatic lipase-related protein 1 [Tribolium castaneum] >gi|270010340|gb|EFA06788.1| Vitellogenin-2-like Protein [Tribolium c…	XP_971476	9.67832e-74	57	244.588	306
contig_7043_92.81	92.81	UNKN	uncharacterized protein LOC100322888		Tribolium castaneum	1498	gi|282165752|ref|NP_001164117.1|uncharacterized protein LOC100322888 [Tribolium castaneum] >gi|270013327|gb|EFA09775.1| hypothetical protein TcasGA2_TC011917 [Tribolium castaneum]	NP_001164117	6.78354e-171	78	499.204	358
contig_70807_6.97	6.97	Development	brevican core protein		Aedes aegypti	494	gi|765339378|ref|XP_011493611.1|AAEL011612-PB [Aedes aegypti] >gi|403183205|gb|EJY57929.1| AAEL011612-PB [Aedes aegypti]	XP_011493611	3.28166e-16	63	83.9593	91
contig_7141_51.26	51.26	Fatty Acid & Lipid Metabolism	low quality protein: prolow-density lipoprotein receptor-related protein 1		Tribolium castaneum	4257	gi|1008444139|ref|XP_008195317.2|PREDICTED: LOW QUALITY PROTEIN: prolow-density lipoprotein receptor-related protein 1 [Tribolium castaneum]	XP_008195317	0	68	1471.83	1351
contig_7172_57.65	57.65	RNA Processing	pre-mrna branch site protein p14		Dendroctonus ponderosae	659	gi|478259603|gb|ENN79456.1|hypothetical protein YQE_04100, partial [Dendroctonus ponderosae]	ENN79456	7.61774e-12	44	72.0182	156
contig_71911_7.03	7.03	Defense/Immune Response	beta- -glucan-binding partial		Acyrthosiphon pisum	324	gi|328721427|ref|XP_001944473.2|PREDICTED: uncharacterized protein LOC100164352 [Acyrthosiphon pisum]	XP_001944473	3.10887e-28	79	119.013	88
contig_72359_14.50	14.5	Signal Tranduction	bone morphogenetic protein 1		Dipodomys ordii	598	gi|852743972|ref|XP_012870056.1|PREDICTED: cubilin [Dipodomys ordii]	XP_012870056	3.7958e-06	55	56.9954	88
contig_7277_47.23	47.23	Translation	eukaryotic translation initiation factor 2-alpha kinase		Halyomorpha halys	2699	gi|939665045|ref|XP_014279929.1|PREDICTED: eukaryotic translation initiation factor 2-alpha kinase [Halyomorpha halys]	XP_014279929	0	58	666.381	950
contig_72799_5.84	5.84	UNKN	unc93-like protein		Tribolium castaneum	386	gi|642917272|ref|XP_008199229.1|PREDICTED: UNC93-like protein isoform X3 [Tribolium castaneum] >gi|642917274|ref|XP_008199230.1| PREDICTED: UNC93-like protein isoform X3 [Tribolium castaneum] >gi|1004401690|gb|KYB28531.1| UNC93-like protein [Tribolium castaneum]	XP_008199229	1.32471e-28	83	119.398	97
contig_73121_13.63	13.63	Development	prominin-like protein isoform x1		Tribolium castaneum	1424	gi|1008449828|ref|XP_015838372.1|PREDICTED: prominin-like protein isoform X5 [Tribolium castaneum]	XP_015838372	6.56655e-08	43	66.2402	292
contig_73165_9.488.95	9488.95	Other	annexin a7 isoform x1	Annexin VII is a membrane binding protein with diverse properties, including voltage-sensitive calcium channel activity, ion selectivity and membrane fusion	Tribolium castaneum	375	gi|642930979|ref|XP_008196164.1|PREDICTED: annexin A7 isoform X1 [Tribolium castaneum] >gi|642930981|ref|XP_008196165.1| PREDICTED: annexin A7 isoform X1 [Tribolium castaneum] >gi|642930983|ref|XP_008196166.1| PREDICTED: annexin A7 isoform X1 [Tribolium castaneum] >gi|1008448048|ref|XP_015837931.1| PREDICTED: annexin A7 isoform X1 [Tribolium castaneum] >gi|1004397447|gb|EFA08486.2| hypothetical p…	XP_008196164	3.09319e-14	70	76.6406	60
contig_73218_19.42	19.42	UNKN	hypothetical protein YQE_11102, partial		Dendroctonus ponderosae	1264	gi|478251793|gb|ENN72239.1|hypothetical protein YQE_11102, partial [Dendroctonus ponderosae]	ENN72239	1.98722e-66	61	231.106	278
contig_7325_465.50	465.5	UNKN	27 kda hemolymph		Tribolium castaneum	1468	gi|91090714|ref|XP_975034.1|PREDICTED: 27 kDa hemolymph protein [Tribolium castaneum] >gi|270013294|gb|EFA09742.1| 27 kDa hemolymph protein-like Protein [Tribolium castaneum]	XP_975034	2.29487e-77	71	256.529	248
contig_7378_611.89	611.89	Development	brevican core protein	May play a role in the terminally differentiating and the adult nervous system during postnatal development	Anopheles gambiae str. PEST	940	gi|158294009|ref|XP_315346.4|AGAP005332-PC [Anopheles gambiae str. PEST] >gi|157015366|gb|EAA11819.4| AGAP005332-PC [Anopheles gambiae str. PEST] >gi|668444200|gb|KFB35079.1| AGAP005332-PC-like protein [Anopheles sinensis]	XP_315346	8.05861e-35	64	134.806	134
contig_74945_19.70	19.7	Fatty Acid & Lipid Metabolism	lipase 3		Tribolium castaneum	365	gi|1008437455|ref|XP_015834988.1|PREDICTED: lipase 3-like [Tribolium castaneum]	XP_015834988	4.03032e-11	77	69.3218	48
contig_75127_10.15	10.15	Sensory Response	general odorant-binding protein 99a		Bactrocera cucurbitae	302	gi|751447118|ref|XP_011177680.1|PREDICTED: general odorant-binding protein 99a-like [Bactrocera cucurbitae]	XP_011177680	1.79065e-15	63	77.7962	91
contig_75174_7.30	7.3	Carbohydrate Metabolism	gpi ethanolamine phosphate transferase 2 isoform x1	Protein involved in the synthesis or the attachment to a protein of a GPI-anchor (glycosylphosphatidylinositol anchor) or a GPI-like-anchor (glycosylsphingolipidinositol anchor)	Tribolium castaneum	558	gi|1008447212|ref|XP_015837707.1|PREDICTED: GPI ethanolamine phosphate transferase 2 isoform X5 [Tribolium castaneum]	XP_015837707	6.43688e-41	62	148.673	164
contig_75318_12.84	12.84	Defense/Immune Response	peptidoglycan-recognition protein lb isoform x3		Tribolium castaneum	579	gi|91085131|ref|XP_969556.1|PREDICTED: peptidoglycan-recognition protein LB isoform X1 [Tribolium castaneum] >gi|270009296|gb|EFA05744.1| Peptidoglycan-recognition protein LB-like Protein [Tribolium castaneum]	XP_969556	2.44004e-56	77	189.119	131
contig_75772_40.02	40.02	Fatty Acid & Lipid Metabolism	apolipoprotein d-like		Acromyrmex echinatior	603	gi|332026341|gb|EGI66470.1|Apolipoprotein D [Acromyrmex echinatior]	EGI66470	2.57521e-44	63	158.688	187
contig_75811_6.37	6.37	UNKN	probable salivary secreted peptide		Athalia rosae	325	gi|817056384|ref|XP_012269050.1|PREDICTED: probable salivary secreted peptide [Athalia rosae]	XP_012269050	1.72761e-12	56	69.707	86
contig_7630_232.77	232.77	UNKN	hypothetical conserved protein		Dendroctonus ponderosae	1115	gi|478259256|gb|ENN79158.1|hypothetical protein YQE_04344, partial [Dendroctonus ponderosae]	ENN79158	3.04312e-72	62	241.506	279
contig_76871_10.47	10.47	Transport	abc transporter g family member 20		Diachasma alloeum	434	gi|970916931|ref|XP_015124920.1|PREDICTED: ABC transporter G family member 20 [Diachasma alloeum]	XP_015124920	4.99751e-21	57	99.3673	149
contig_7701_42.73	42.73	Detoxification	integument esterase		Tribolium castaneum	1597	gi|189239947|ref|XP_001814500.1|PREDICTED: esterase FE4 [Tribolium castaneum] >gi|270012138|gb|EFA08586.1| Esterase-6-like Protein [Tribolium castaneum]	XP_001814500	0	75	645.58	511
contig_771_846.09	846.09	Protein & Amino Acid Metabolism	tyrosine-protein phosphatase lar-like protein		Tribolium castaneum	6108	gi|1004398372|gb|KYB26639.1|Tyrosine-protein phosphatase Lar-like Protein [Tribolium castaneum]	KYB26639	0	77	784.252	589
contig_773_30.28	30.28	Development	osiris 9		Acyrthosiphon pisum	1757	gi|193709302|ref|XP_001951658.1|PREDICTED: uncharacterized protein LOC100163560 [Acyrthosiphon pisum]	XP_001951658	1.59941e-112	93	349.362	264
contig_7741_231.56	231.56	Defense/Immune Response	attacin 2		Microdera dzhungarica	650	gi|576864472|gb|AHH34163.1|attacin 2 [Microdera dzhungarica]	AHH34163	4.72597e-38	68	141.354	159
contig_77502_9.06	9.06	Proteolysis	pacifastin-like protease inhibitor cvp4		Aedes aegypti	385	gi|157103392|ref|XP_001647959.1|AAEL000551-PA [Aedes aegypti] >gi|108884182|gb|EAT48407.1| AAEL000551-PA [Aedes aegypti]	XP_001647959	4.80219e-05	59	51.6026	52
contig_7788_43.14	43.14	UNKN	hypothetical protein YQE_06126, partial		Dendroctonus ponderosae	2842	gi|478257137|gb|ENN77300.1|hypothetical protein YQE_06126, partial [Dendroctonus ponderosae] >gi|546681456|gb|ERL91553.1| hypothetical protein D910_08883 [Dendroctonus ponderosae]	ENN77300	1.66186e-09	78	69.3218	47
contig_77919_19.65	19.65	UNKN	hypothetical protein LOTGIDRAFT_159529		Lottia gigantea	549	gi|676449491|ref|XP_009052071.1|hypothetical protein LOTGIDRAFT_159529 [Lottia gigantea] >gi|556108836|gb|ESO97488.1| hypothetical protein LOTGIDRAFT_159529 [Lottia gigantea]	XP_009052071	4.61226e-11	42	67.3958	128
contig_78085_9.27	9.27	Proteolysis	serine protease easter-like		Ostrinia furnacalis	369	gi|1000478154|gb|AML39475.1|serine protease [Ostrinia furnacalis]	AML39475	4.49852e-07	55	57.7658	56
contig_7851_39.57	39.57	UNKN	predicted protein		Hordeum vulgare subsp. vulgare	1015	gi|326522861|dbj|BAJ88476.1|predicted protein [Hordeum vulgare subsp. vulgare]	BAJ88476	8.02364e-27	66	114.005	114
contig_78517_12.79	12.79	UNKN	agap011571-pa-like protein		Zootermopsis nevadensis	923	gi|646718574|gb|KDR20986.1|hypothetical protein L798_04498 [Zootermopsis nevadensis]	KDR20986	1.82087e-14	69	78.5666	66
contig_79094_23.15	23.15	UNKN	multiple c2 and transmembrane domain-containing protein 1 isoform x2		Tribolium castaneum	1007	gi|642928510|ref|XP_008193821.1|PREDICTED: multiple C2 and transmembrane domain-containing protein 1 isoform X2 [Tribolium castaneum] >gi|1004398562|gb|EFA07297.2| Multiple C2 and transmembrane domain-containing protein 1-like Protein [Tribolium castaneum]	XP_008193821	2.84794e-65	83	232.646	189
contig_793_1.308.57	1308.57	Defense/Immune Response	gram negative bacteria binding protein 2	lays an important role in non-self recognition and the subsequent immune signal transmission for the induction of antimicrobial peptide genes in the Drosophila innate immune system	Nasutitermes dixoni	1224	gi|70795062|gb|AAZ08494.1|gram negative bacteria binding protein 2 [Nasutitermes dixoni]	AAZ08494	1.19296e-101	60	319.316	373
contig_79499_23.63	23.63	Proteolysis	serine protease inhibitor kazal-type 1		Diuraphis noxia	847	gi|985412767|ref|XP_015371909.1|PREDICTED: serine protease inhibitor Kazal-type 1 [Diuraphis noxia]	XP_015371909	3.10471e-45	97	160.229	96
contig_8025_54.43	54.43	Defense/Immune Response	leucine-rich repeat-containing protein 4c-like		Tribolium castaneum	3821	gi|1008455234|ref|XP_008190837.2|PREDICTED: uncharacterized protein LOC655571 [Tribolium castaneum]	XP_008190837	0	73	607.06	573
contig_80250_69.84	69.84	Defense/Immune Response	pr-5-like protein	Pathogenesis-related (PR)-5 proteins	Tribolium castaneum	567	gi|91077370|ref|XP_975175.1|PREDICTED: pathogenesis-related protein 5 [Tribolium castaneum] >gi|270001655|gb|EEZ98102.1| Pathogenesis-related protein 5-like Protein [Tribolium castaneum]	XP_975175	2.36197e-77	76	243.817	178
contig_8049_101.27	101.27	OX-REDOX	ero1-like protein	ER oxidoreductin 1 (Ero1) is an oxidoreductase enzyme	Athalia rosae	1955	gi|817084284|ref|XP_012264787.1|PREDICTED: ero1-like protein [Athalia rosae]	XP_012264787	7.00569e-167	68	498.819	495
contig_812_432.49	432.49	Translation	translocon-associated protein subunit delta		Tribolium castaneum	775	gi|91093903|ref|XP_969673.1|PREDICTED: translocon-associated protein subunit delta [Tribolium castaneum] >gi|270014509|gb|EFA10957.1| Translocon-associated protein subunit delta-like Protein [Tribolium castaneum]	XP_969673	1.21754e-38	65	144.436	164
contig_81527_11.21	11.21	Proteolysis	er degradation-enhancing alpha-mannosidase-like protein 1 isoform x1		Zootermopsis nevadensis	301	gi|646713767|gb|KDR17988.1|ER degradation-enhancing alpha-mannosidase-like 1 [Zootermopsis nevadensis]	KDR17988	3.71906e-12	73	72.0182	67
contig_81804_7.36	7.36	UNKN	ACYPI002813		Acyrthosiphon pisum	692	gi|239788501|dbj|BAH70926.1|ACYPI002813 [Acyrthosiphon pisum]	BAH70926	2.5913e-21	82	96.6709	82
contig_81934_12.30	12.3	Proteolysis	serine-protein kinase atm isoform x1		Tribolium castaneum	398	gi|642938387|ref|XP_008191049.1|PREDICTED: serine-protein kinase ATM isoform X1 [Tribolium castaneum] >gi|642938389|ref|XP_008191050.1| PREDICTED: serine-protein kinase ATM isoform X1 [Tribolium castaneum] >gi|1004403329|gb|EFA11787.2| Serine-protein kinase ATM-like Protein [Tribolium castaneum]	XP_008191049	2.86431e-10	48	68.5514	131
contig_8227_10.67	10.67	UNKN	LOW QUALITY PROTEIN: uncharacterized protein Dvir_GJ19021		Drosophila virilis	547	gi|968099095|ref|XP_002055035.2|LOW QUALITY PROTEIN: uncharacterized protein Dvir_GJ19021 [Drosophila virilis] >gi|946564828|gb|EDW65236.2| LOW QUALITY PROTEIN: uncharacterized protein Dvir_GJ19021 [Drosophila virilis]	XP_002055035	2.19172e-06	48	57.3806	138
contig_8228_129.01	129.01	UNKN	protein angel isoform x2		Dendroctonus ponderosae	1902	gi|478258505|gb|ENN78580.1|hypothetical protein YQE_04948, partial [Dendroctonus ponderosae] >gi|546681354|gb|ERL91464.1| hypothetical protein D910_08794 [Dendroctonus ponderosae]	ENN78580	9.85191e-102	57	331.257	495
contig_82729_12.47	12.47	Transport	nose resistant to fluoxetine protein 6-like protein		Tribolium castaneum	382	gi|1004400355|gb|KYB27753.1|Nose resistant to fluoxetine protein 6-like Protein [Tribolium castaneum]	KYB27753	6.1256e-05	65	51.6026	55
contig_83107_11.57	11.57	Transport	thiamine transporter 2-like isoform x1		Acyrthosiphon pisum	319	gi|641660103|ref|XP_008181368.1|PREDICTED: folate transporter 1-like [Acyrthosiphon pisum]	XP_008181368	5.34609e-34	95	130.954	68
contig_8316_224.65	224.65	UNKN	hypothetical protein RR46_05292		Papilio xuthus	578	gi|930658845|gb|KPJ01027.1|hypothetical protein RR46_05292 [Papilio xuthus]	KPJ01027	9.03811e-06	43	55.0694	130
contig_8328_156.64	156.64	Transport	cation-dependent mannose-6-phosphate receptor-like	Mannose 6-phosphate receptors bind newly synthesized lysosomal hydrolases in the trans-Golgi network (TGN) and deliver them to pre-lysosomal compartments.	Tribolium castaneum	1450	gi|642932524|ref|XP_008197150.1|PREDICTED: uncharacterized protein LOC103314060 [Tribolium castaneum] >gi|270011558|gb|EFA08006.1| hypothetical protein TcasGA2_TC005595 [Tribolium castaneum]	XP_008197150	1.04613e-37	51	149.443	286
contig_83566_8.78	8.78	DNA Replication & Repair	reverse transcriptase family protein		Erysiphe necator	327	gi|730178084|gb|KHJ32378.1|hypothetical protein EV44_g3605 [Erysiphe necator]	KHJ32378	5.97121e-35	81	132.88	88
contig_8461_84.19	84.19	Proteolysis	inter-alpha-trypsin inhibitor heavy chain h4 isoform x1		Tribolium castaneum	2856	gi|642922794|ref|XP_008193328.1|PREDICTED: inter-alpha-trypsin inhibitor heavy chain H4 isoform X1 [Tribolium castaneum]	XP_008193328	0	70	798.119	816
contig_8471_113.32	113.32	Cell Cycle & Processes	connectin-like protein	glycoprotein plays a critical role in photoreceptor cell morphogenesis	Tribolium castaneum	1092	gi|270001576|gb|EEZ98023.1|Chaoptin-like Protein [Tribolium castaneum]	EEZ98023	9.75493e-99	69	309.301	315
contig_8487_87.50	87.5	Fatty Acid & Lipid Metabolism	apolipoprotein d-like		Copidosoma floridanum	678	gi|936601558|ref|XP_014214465.1|PREDICTED: apolipoprotein D-like [Copidosoma floridanum] >gi|936601560|ref|XP_014214466.1| PREDICTED: apolipoprotein D-like [Copidosoma floridanum]	XP_014214465	9.63134e-23	52	102.449	170
contig_85576_21.82	21.82	Defense/Immune Response	c-type lysozyme 1		Harmonia axyridis	413	gi|732554597|gb|AIZ72679.1|c-type lysozyme 1 [Harmonia axyridis]	AIZ72679	4.33349e-66	92	210.305	116
contig_85638_6.52	6.52	Other	transposable element tc3 partial		Harpegnathos saltator	352	gi|307197059|gb|EFN78431.1|Transposable element Tc3 transposase, partial [Harpegnathos saltator]	EFN78431	2.33871e-21	67	84.3445	74
contig_857_535.52	535.52	Defense/Immune Response	esterase fe4-like	Evidence that the E4 and FE4 esterase genes responsible for insecticide resistance in the aphid Myzus persicae	Monomorium pharaonis	2012	gi|826425633|ref|XP_012527268.1|PREDICTED: esterase FE4-like [Monomorium pharaonis]	XP_012527268	6.75049e-80	52	276.559	561
contig_85930_10.61	10.61	Proteolysis	carboxypeptidase m-like isoform x1	There is evidence that CPM functions not only as a protease but also as a binding partner in cell-surface protein–protein interactions	Tribolium castaneum	425	gi|642932900|ref|XP_008197178.1|PREDICTED: carboxypeptidase M isoform X2 [Tribolium castaneum] >gi|1004396850|gb|KYB25743.1| carboxypeptidase A [Tribolium castaneum]	XP_008197178	4.14255e-11	73	70.0922	57
contig_86_1.262.65	1262.65	Transport	balbiani ring protein 3-like	Balbiani ring protein 3 could play a role as a transport protein	Tribolium castaneum	2796	gi|1008436257|ref|XP_015834682.1|PREDICTED: balbiani ring protein 3 isoform X1 [Tribolium castaneum] >gi|1004400778|gb|EFA02460.2| hypothetical protein TcasGA2_TC008148 [Tribolium castaneum]	XP_015834682	1.4195e-36	53	149.828	249
contig_86170_5.72	5.72	UNKN	hypothetical protein UZ11_BCD004000754		Bacteroidetes bacterium OLB11	478	gi|1000281615|gb|KXK43435.1|hypothetical protein UZ11_BCD004000754 [Bacteroidetes bacterium OLB11]	KXK43435	1.51278e-32	77	127.487	100
contig_86295_5.15	5.15	UNKN	PREDICTED: uncharacterized protein LOC100163961		Acyrthosiphon pisum	348	gi|328715340|ref|XP_001952019.2|PREDICTED: uncharacterized protein LOC100163961 [Acyrthosiphon pisum]	XP_001952019	4.51945e-19	56	90.5077	121
contig_8659_172.39	172.39	UNKN	PREDICTED: uncharacterized protein LOC107163372		Diuraphis noxia	774	gi|985397420|ref|XP_015366255.1|PREDICTED: uncharacterized protein LOC107163372 [Diuraphis noxia]	XP_015366255	2.71167e-84	91	261.536	159
contig_86623_16.88	16.88	UNKN	transmembrane protein partial		Trachymyrmex cornetzi	432	gi|1009396067|gb|KYN16826.1|hypothetical protein ALC57_10890 [Trachymyrmex cornetzi]	KYN16826	4.8416e-07	65	54.299	52
contig_8667_23.44	23.44	RNA Processing	superkiller viralicidic activity 2-like 2	May be involved in pre-mRNA splicing	Oryctes borbonicus	1566	gi|952513264|gb|KRT79869.1|helicase [Oryctes borbonicus]	KRT79869	6.00581e-19	86	101.293	82
contig_8685_175.26	175.26	Metabolism	phosphatidylinositol-glycan biosynthesis class x protein		Tribolium castaneum	989	gi|1004400627|gb|KYB27910.1|Phosphatidylinositol-glycan biosynthesis class X protein-like Protein [Tribolium castaneum]	KYB27910	1.98506e-56	62	194.512	224
contig_86896_6.47	6.47	Proteolysis	probable inactive atp-dependent zinc metalloprotease ftshi chloroplastic		Arachis duranensis	346	gi|1012092970|ref|XP_015955296.1|PREDICTED: probable inactive ATP-dependent zinc metalloprotease FTSHI 1, chloroplastic [Arachis duranensis]	XP_015955296	1.7547e-54	96	192.2	108
contig_872_443.58	443.58	Defense/Immune Response	t-cell immunomodulatory protein		Tribolium castaneum	2356	gi|1004395899|gb|KYB25191.1|RING finger protein 10-like protein [Tribolium castaneum]	KYB25191	0	81	855.514	576
contig_875_124.74	124.74	Proteolysis	er degradation-enhancing alpha-mannosidase-like protein 3		Tribolium castaneum	4099	gi|91088351|ref|XP_971536.1|PREDICTED: ER degradation-enhancing alpha-mannosidase-like protein 3 [Tribolium castaneum] >gi|1004397317|gb|EFA08227.2| ER degradation-enhancing alpha-mannosidase-like protein 3 [Tribolium castaneum]	XP_971536	0	78	1290.02	987
contig_8761_71.19	71.19	Defense/Immune Response	golgi-associated plant pathogenesis-related protein 1-like	targets misfolded glycoproteins for degradation	Acyrthosiphon pisum	1956	gi|328722183|ref|XP_001948456.2|PREDICTED: putative uncharacterized protein DDB_G0277255 [Acyrthosiphon pisum]	XP_001948456	2.07038e-98	54	325.479	606
contig_8770_33.19	33.19	Exocuticle-related	hemolymph juvenile hormone-binding partial		Tribolium castaneum	2086	gi|189234839|ref|XP_001812344.1|PREDICTED: uncharacterized protein LOC100142563 [Tribolium castaneum] >gi|1004403091|gb|KYB29376.1| hypothetical protein TcasGA2_TC032223 [Tribolium castaneum]	XP_001812344	3.80779e-92	79	300.442	277
contig_87920_13.01	13.01	UNKN	PREDICTED: uncharacterized protein LOC100164831 isoform X2		Acyrthosiphon pisum	602	gi|641675575|ref|XP_008187094.1|PREDICTED: uncharacterized protein LOC100164831 isoform X2 [Acyrthosiphon pisum]	XP_008187094	4.2501e-18	51	87.8113	129
contig_87969_19.92	19.92	UNKN	hypothetical protein RF55_11860		Lasius niger	393	gi|861625711|gb|KMQ88623.1|hypothetical protein RF55_11860 [Lasius niger]	KMQ88623	0.000121493	65	50.0618	43
contig_887_373.31	373.31	Other	zonadhesin-like isoform x1	Zonadhesin is a multiple-domain transmembrane protein that is believed to function as a sperm-zona pellucida binding protein	Tribolium castaneum	875	gi|91080607|ref|XP_967476.1|PREDICTED: mucin-5B [Tribolium castaneum] >gi|270005833|gb|EFA02281.1| hypothetical protein TcasGA2_TC007945 [Tribolium castaneum]	XP_967476	5.27992e-16	59	84.7297	120
contig_8895_12.83	12.83	Cell Cycle & Processes	flocculation protein flo11-like	Cell wall protein that participates in adhesive cell-cell interactions	Diuraphis noxia	373	gi|985388820|ref|XP_015378987.1|PREDICTED: flocculation protein FLO11-like [Diuraphis noxia]	XP_015378987	8.07926e-28	82	118.627	78
contig_89435_142.51	142.51	Defense/Immune Response	pathogenesis-related protein 5	Pathogenesis-related (PR) proteins are proteins produced in plants in the event of a pathogen attack.[1] They are induced as part of systemic acquired resistance	Tribolium castaneum	314	gi|91077370|ref|XP_975175.1|PREDICTED: pathogenesis-related protein 5 [Tribolium castaneum] >gi|270001655|gb|EEZ98102.1| Pathogenesis-related protein 5-like Protein [Tribolium castaneum]	XP_975175	4.99672e-08	70	58.5362	44
contig_89480_11.51	11.51	Other	nucleic-acid-binding protein from mobile element jockey-like		Limulus polyphemus	550	gi|926635687|ref|XP_013783744.1|PREDICTED: nucleic-acid-binding protein from mobile element jockey-like [Limulus polyphemus]	XP_013783744	0.000823254	53	42.743	84
contig_900_1.877.78	1877.78	Signal Tranduction	g-protein coupled receptor mth2		Tribolium castaneum	2170	gi|1004399753|gb|KYB27423.1|putative G-protein coupled receptor Mth-like 11 [Tribolium castaneum]	KYB27423	1.56916e-97	55	327.02	584
contig_90116_8.35	8.35	Defense/Immune Response	coleoptericin-like protein	This family consists of several insect coleoptericin, acaloleptin, holotricin and rhinocerosin proteins which are all known to be antibacterial proteins [PMID: 11520352]. These all appear to be short, glycine-rich molecules, inducible by infection.	Acalolepta luxuriosa	360	gi|353526207|sp|P81592.2|ACALA_ACALURecName: Full=Acaloleptin A; Contains: RecName: Full=Acaloleptin A1; Contains: RecName: Full=Acaloleptin A2; Contains: RecName: Full=Acaloleptin A3; Contains: RecName: Full=Acaloleptin A4; Contains: RecName: Full=Acidic peptide; Contains: RecName: Full=Acaloleptin A5; Flags: Precursor [Acalolepta luxuriosa] >gi|34097970|dbj|BAC82199.1| acaloleptin A precursor […	P81592	2.197e-06	69	55.4546	52
contig_9017_220.19	220.19	Fatty Acid & Lipid Metabolism	apolipoprotein d-like		Athalia rosae	854	gi|817067974|ref|XP_012255906.1|PREDICTED: apolipoprotein D-like [Athalia rosae]	XP_012255906	1.75193e-59	68	199.904	185
contig_9107_158.27	158.27	Fatty Acid & Lipid Metabolism	prostatic acid phosphatase-like		Tribolium castaneum	2354	gi|91085409|ref|XP_967434.1|PREDICTED: prostatic acid phosphatase [Tribolium castaneum] >gi|270009157|gb|EFA05605.1| Prostatic acid phosphatase-like Protein [Tribolium castaneum]	XP_967434	3.06199e-128	66	401.749	422
contig_911_85.04	85.04	OX-REDOX	procollagen- -oxoglutarate 5-dioxygenase 1 isoform x1		Tribolium castaneum	3456	gi|642923679|ref|XP_008193838.1|PREDICTED: procollagen-lysine,2-oxoglutarate 5-dioxygenase 1 isoform X3 [Tribolium castaneum] >gi|1004399456|gb|EFA03403.2| Procollagen-lysine,2-oxoglutarate 5-dioxygenase 3-like Protein [Tribolium castaneum]	XP_008193838	0	81	1072.38	733
contig_9167_41.07	41.07	Transport	solute carrier family 28 member 3		Tribolium castaneum	1486	gi|91084291|ref|XP_971690.1|PREDICTED: solute carrier family 28 member 3 [Tribolium castaneum] >gi|270008747|gb|EFA05195.1| Sodium/nucleoside cotransporter 2-like Protein [Tribolium castaneum]	XP_971690	2.04117e-160	75	479.174	419
contig_9230_248.76	248.76	OX-REDOX	nadh dehydrogenase		Dendroctonus ponderosae	468	gi|478255291|gb|ENN75517.1|hypothetical protein YQE_07861, partial [Dendroctonus ponderosae] >gi|546683155|gb|ERL93006.1| hypothetical protein D910_10308 [Dendroctonus ponderosae]	ENN75517	9.32403e-24	75	99.3673	70
contig_9264_48.09	48.09	Sensory Response	esterase-6-like protein	esterase-6 (EST-6), is involved in the physiological and behavioral dynamics of the response of Drosophila melanogaster to its volatile pheromone	Leptinotarsa decemlineata	1682	gi|728418139|gb|AIY68358.1|esterase [Leptinotarsa decemlineata]	AIY68358	3.53926e-139	60	427.943	548
contig_92889_9.01	9.01	UNKN	flagellar biosynthesis protein partial		Tribolium castaneum	446	gi|1008429862|ref|XP_001815109.3|PREDICTED: uncharacterized protein LOC100142559 [Tribolium castaneum] >gi|270002282|gb|EEZ98729.1| hypothetical protein TcasGA2_TC001282 [Tribolium castaneum]	XP_001815109	4.4217e-28	63	111.309	108
contig_9297_206.63	206.63	UNKN	neuferricin homolog		Tribolium castaneum	1097	gi|91088125|ref|XP_970460.1|PREDICTED: neuferricin [Tribolium castaneum] >gi|270012113|gb|EFA08561.1| Neuferricin homolog-like Protein [Tribolium castaneum]	XP_970460	7.59045e-68	66	226.098	245
contig_932_7.009.19	7009.19	Proteolysis	93 kda serpin	Serpins are a superfamily of proteins with similar structures that were first identified for their protease inhibition	Tenebrio molitor	1759	gi|349584988|dbj|BAL03254.1|93 kDa serpin [Tenebrio molitor]	BAL03254	1.55245e-148	73	462.225	412
contig_93451_8.45	8.45	Protein & Amino Acid Metabolism	histone-lysine n- h3 lysine-36 and h4 lysine-20 specific-like	This enzyme participates in methionine metabolism	Acyrthosiphon pisum	321	gi|328710201|ref|XP_001949266.2|PREDICTED: probable methylthioribulose-1-phosphate dehydratase isoform X2 [Acyrthosiphon pisum]	XP_001949266	2.42703e-20	85	94.3597	75
contig_9373_144.85	144.85	Signal Tranduction	nodal modulator 3		Tribolium castaneum	4545	gi|1008426161|ref|XP_015834614.1|PREDICTED: nodal modulator 1 [Tribolium castaneum] >gi|270014696|gb|EFA11144.1| hypothetical protein TcasGA2_TC004746 [Tribolium castaneum]	XP_015834614	0	68	1095.49	1155
contig_93822_10.78	10.78	Transport	acetyl-coenzyme a transporter 1-like		Acyrthosiphon pisum	513	gi|328717028|ref|XP_001950903.2|PREDICTED: acetyl-coenzyme A transporter 1-like [Acyrthosiphon pisum]	XP_001950903	2.97145e-80	91	259.225	171
contig_94373_8.86	8.86	Heat Shock/Stess Response	immediate early response 3-interacting protein 1	ER stress response	Cephus cinctus	365	gi|1000752186|ref|XP_015598958.1|PREDICTED: immediate early response 3-interacting protein 1 [Cephus cinctus]	XP_015598958	2.83729e-40	89	140.969	82
contig_9532_22.88	22.88	Cell Cycle & Processes	protein brambleberry-like	Dynamic assembly of brambleberry mediates nuclear envelope fusion during early development	Tribolium castaneum	2544	gi|189237709|ref|XP_001810287.1|PREDICTED: protein brambleberry [Tribolium castaneum] >gi|1004399618|gb|EFA04315.2| Protein brambleberry-like Protein [Tribolium castaneum]	XP_001810287	0	70	615.15	572
contig_9560_77.78	77.78	Other	protein takeout	takeout (to) is a Drosophila circadian clock-regulated output gene	Tribolium castaneum	1240	gi|642923622|ref|XP_972960.2|PREDICTED: protein takeout [Tribolium castaneum] >gi|270006969|gb|EFA03417.1| Protein takeout-like Protein [Tribolium castaneum]	XP_972960	3.89423e-107	73	329.717	270
contig_95793_6.05	6.05	Proteolysis	zinc metalloproteinase nas-12		Anopheles darlingi	419	gi|568256644|gb|ETN65117.1|zinc metalloproteinase nas-12 [Anopheles darlingi]	ETN65117	2.10026e-06	57	55.4546	90
contig_958_1.306.36	1306.36	Fatty Acid & Lipid Metabolism	prostatic acid phosphatase		Tribolium castaneum	1751	gi|91085409|ref|XP_967434.1|PREDICTED: prostatic acid phosphatase [Tribolium castaneum] >gi|270009157|gb|EFA05605.1| Prostatic acid phosphatase-like Protein [Tribolium castaneum]	XP_967434	4.38333e-90	57	296.204	362
contig_96022_13.28	13.28	Cell Cycle & Processes	tgf-beta receptor type-1 isoform x2		Tribolium castaneum	430	gi|642915224|ref|XP_008190530.1|PREDICTED: TGF-beta receptor type-1 isoform X2 [Tribolium castaneum]	XP_008190530	2.278e-12	79	73.9442	44
contig_961_122.86	122.86	Defense/Immune Response	cysteine-rich venom protein 6	may be involved in the pathogenesis of these disease	Tribolium castaneum	682	gi|91080607|ref|XP_967476.1|PREDICTED: mucin-5B [Tribolium castaneum] >gi|270005833|gb|EFA02281.1| hypothetical protein TcasGA2_TC007945 [Tribolium castaneum]	XP_967476	1.36885e-19	49	93.9745	206
contig_9642_145.00	145	Other	receptor-type tyrosine-protein phosphatase f isoform x1		Tribolium castaneum	2262	gi|642927772|ref|XP_008195399.1|PREDICTED: receptor-type tyrosine-protein phosphatase F isoform X1 [Tribolium castaneum]	XP_008195399	1.16267e-08	37	70.0922	446
contig_9673_32.46	32.46	UNKN	calcium-dependent protein kinase 17		Nicotiana plumbaginifolia	650	gi|47271334|emb|CAG27840.1|calcium-dependent protein kinase 17 [Nicotiana plumbaginifolia]	CAG27840	2.96945e-13	56	78.5666	125
contig_96805_16.30	16.3	Other	platelet glycoprotein v		Dendroctonus ponderosae	589	gi|478254642|gb|ENN74884.1|hypothetical protein YQE_08549, partial [Dendroctonus ponderosae] >gi|546679235|gb|ERL89729.1| hypothetical protein D910_07090 [Dendroctonus ponderosae]	ENN74884	1.24563e-18	67	93.2041	100
contig_97127_8.38	8.38	Fatty Acid & Lipid Metabolism	fatty acyl- reductase cg5065		Cimex lectularius	529	gi|939262801|ref|XP_014251339.1|PREDICTED: putative fatty acyl-CoA reductase CG5065 isoform X2 [Cimex lectularius]	XP_014251339	6.11547e-65	73	219.164	174
contig_9741_64.79	64.79	Carbohydrate Metabolism	cation-independent mannose-6-phosphate receptor		Tribolium castaneum	4332	gi|1008425130|ref|XP_015832869.1|PREDICTED: cation-independent mannose-6-phosphate receptor [Tribolium castaneum]	XP_015832869	4.87803e-91	51	322.783	679
contig_97496_10.07	10.07	Proteolysis	gamma-interferon-inducible lysosomal thiol reductase-like		Tribolium castaneum	602	gi|1008430419|ref|XP_008190387.2|PREDICTED: uncharacterized protein LOC100142038 [Tribolium castaneum]	XP_008190387	3.3745e-41	63	155.606	158
contig_97942_15.90	15.9	UNKN	hypothetical protein RMATCC62417_13512		Rhizopus microsporus	439	gi|727138342|emb|CEG78987.1|hypothetical protein RMATCC62417_13512 [Rhizopus microsporus]	CEG78987	1.13533e-54	77	181.03	129
contig_980_107.86	107.86	UNKN	membrane protein fam174b-like		Acromyrmex echinatior	1062	gi|746853862|ref|XP_011057550.1|PREDICTED: membrane protein FAM174B-like [Acromyrmex echinatior] >gi|332023281|gb|EGI63535.1| hypothetical protein G5I_08053 [Acromyrmex echinatior]	XP_011057550	5.81411e-09	55	65.4698	144
contig_983_831.79	831.79	Cell Cycle & Processes	protein isoforms b c		Tribolium castaneum	5842	gi|642933924|ref|XP_008197569.1|PREDICTED: protein Skeletor, isoforms B/C isoform X1 [Tribolium castaneum]	XP_008197569	0	85	1052.74	669
contig_9885_68.07	68.07	UNKN	PREDICTED: uncharacterized protein LOC107163372		Diuraphis noxia	708	gi|985397420|ref|XP_015366255.1|PREDICTED: uncharacterized protein LOC107163372 [Diuraphis noxia]	XP_015366255	6.86509e-89	93	272.322	159
contig_98900_15.32	15.32	Other	circadian clock-controlled		Diuraphis noxia	1111	gi|985394974|ref|XP_015364913.1|PREDICTED: protein takeout-like [Diuraphis noxia]	XP_015364913	1.43911e-170	99	489.189	260
contig_98917_11.31	11.31	Fatty Acid & Lipid Metabolism	lipolytic protein g-d-s-l family		Verrucomicrobia bacterium IMCC26134	301	gi|809017395|ref|WP_046296982.1|hypothetical protein [Verrucomicrobia bacterium IMCC26134] >gi|807238891|gb|AKC81591.1| hypothetical protein IMCC26134_00245 [Verrucomicrobia bacterium IMCC26134]	WP_046296982	2.15605e-17	63	84.3445	86
contig_99_367.68	367.68	OX-REDOX	ferric-chelate reductase 1 homolog		Tribolium castaneum	2949	gi|91086463|ref|XP_969857.1|PREDICTED: putative ferric-chelate reductase 1 homolog [Tribolium castaneum] >gi|1008444835|ref|XP_015836986.1| PREDICTED: putative ferric-chelate reductase 1 homolog [Tribolium castaneum] >gi|270009811|gb|EFA06259.1| Putative ferric-chelate reductase 1 homolog-like Protein [Tribolium castaneum]	XP_969857	0	78	774.622	606
contig_99098_17.98	17.98	Defense/Immune Response	coleoptericin-like protein		Zophobas atratus	444	gi|116876|sp|P80032.1|COLE_ZOPATRecName: Full=Coleoptericin [Zophobas atratus] >gi|241393|gb|AAB20744.1| coleoptericin=peptide A [Zophobas atratus, Peptide, 74 aa]	P80032	5.15099e-18	71	84.3445	74
contig_9943_86.11	86.11	UNKN	osiris 6-like precursor		Acyrthosiphon pisum	1922	gi|242247417|ref|NP_001156069.1|osiris 6-like precursor [Acyrthosiphon pisum] >gi|239792779|dbj|BAH72689.1| ACYPI000840 [Acyrthosiphon pisum]	NP_001156069	2.42292e-125	97	385.185	286
contig_9952_80.92	80.92	Defense/Immune Response	leucine-rich repeats and immunoglobulin-like domains protein 1 isoform x1		Tribolium castaneum	2342	gi|642912957|ref|XP_008201325.1|PREDICTED: leucine-rich repeat-containing protein let-4-like [Tribolium castaneum]	XP_008201325	3.71367e-42	52	172.17	494
contig_9973_105.35	105.35	Fatty Acid & Lipid Metabolism	phospholipase a2 inhibitor and ly6 plaur domain-containing protein		Tribolium castaneum	1255	gi|642934343|ref|XP_008198610.1|PREDICTED: uncharacterized protein LOC103314398 [Tribolium castaneum] >gi|1004396618|gb|KYB25614.1| hypothetical protein TcasGA2_TC034294 [Tribolium castaneum]	XP_008198610	6.75804e-55	86	190.66	122
